# Supplementary material for: XLF acts as a flexible connector during non-homologous end joining
Source: eLife. 2020 Dec 8;9:e61920. doi: 10.7554/eLife.61920 (PMC7744095; doi:10.7554/eLife.61920)
Supplement: Figure 2—figure supplement 1—source data 1. [file elife-61920-fig2-figsupp1-data1.xls]

## Sheet: Sheet1
2020 07 07 Averaging and Replicate analysis
	2020 07 01		Replicate 1				Boltzman-derived								Derivative curve-determined
	Well	Protein	Ligand	Buffer	Salt	Task	Tm B	dTm B	B Fit	Tm B Start	Tm B End	Flag Indicator	Single/Multiple	Analysis Mode	Tm D	dTm D
	A01			Buffer 1		NPC						0	Single	Auto
	A02	Protein 1				Reference	54.6366	0.00748062	1.21449	43.0847	60.8051	0	Single	Auto	55.8512	0.0493088
	A03	Protein 2				Sample	54.8455	0.216446	1.19133	44.7213	60.8051	0	Single	Auto	55.8512	0.0493088
	A04	Protein 3				Sample	56.9674	2.33832	1.02161	49.8004	60.918	1	Single	Auto	57.6263	1.82445
	A05	Protein 4				Sample	56.0889	1.45987	1.10328	47.938	60.4665	1	Single	Auto	56.7388	0.936882
	A06	Protein 5				Sample	54.6249	-0.00415039	1.20743	44.6648	60.8051	1	Single	Auto	55.7033	-0.0986214
	A07	Protein 6				Sample	54.0082	-0.62085	1.14284	44.4955	58.9428	1	Single	Auto	55.1116	-0.690338
	B01			Buffer 1		NPC						0	Single	Auto
	B02	Protein 1				Reference	54.7208	0.0917511	1.22022	43.0282	60.7487	0	Single	Auto	55.8512	0.0493088
	B03	Protein 2				Sample	54.8344	0.205307	1.20266	44.6648	60.918	0	Single	Auto	55.8512	0.0493088
	B04	Protein 3				Sample	57.1937	2.56457	1.01812	49.9132	61.2002	1	Single	Auto	57.7743	1.97238
	B05	Protein 4				Sample	56.2045	1.57537	1.07284	48.3895	60.4101	1	Single	Auto	56.8867	1.08481
	B06	Protein 5				Sample	54.7731	0.143974	1.2097	45.3985	60.1279	0	Single	Auto	55.8512	0.0493088
	B07	Protein 6				Sample	54.0833	-0.545811	1.16924	44.6084	59.225	0	Single	Auto	55.1116	-0.690338
	C01			Buffer 1		NPC						0	Single	Auto
	C02	Protein 1				Reference	54.5299	-0.0992279	1.16569	43.3668	60.0715	1	Single	Auto	55.7033	-0.0986214
	C03	Protein 2				Sample	54.7406	0.1115	1.17927	44.7777	60.4665	0	Single	Auto	55.7033	-0.0986214
	C04	Protein 3				Sample	57.0792	2.45011	1.04259	49.3489	61.3695	1	Single	Auto	57.9222	2.12031
	C05	Protein 4				Sample	56.2175	1.58839	1.05573	48.5024	60.2972	1	Single	Auto	56.8867	1.08481
	C06	Protein 5				Sample	55.1644	0.535362	1.20961	45.0599	60.8051	0	Single	Auto	56.1471	0.345165
	C07	Protein 6				Sample	54.1928	-0.436295	1.22343	44.7213	60.0715	0	Single	Auto	55.2595	-0.542408
							Average Tm B
		Protein 1					54.6291
		Protein 2					54.8068
		Protein 3					57.0801
		Protein 4					56.1703
		Protein 5					54.8541
		Protein 6					54.0948
	2020 07 01B		Replicate 2				Boltzman-derived								Derivative curve-determined
	Well	Protein	Ligand	Buffer	Salt	Task	Tm B	dTm B	B Fit	Tm B Start	Tm B End	Flag Indicator	Single/Multiple	Analysis Mode	Tm D	dTm D
	A01					NPC						0	Single	Auto
	A02	Protein 1				Reference	54.7933	0.00958633	1.21471	43.1893	61.1204	0	Single	Auto	56.0082	0
	A03	Protein 2				Sample	54.9686	0.184868	1.18809	44.8349	61.0636	0	Single	Auto	56.0082	0
	A04	Protein 3				Sample	57.0614	2.27773	1.02304	49.7148	61.0636	1	Single	Auto	57.7835	1.77532
	A05	Protein 4				Sample	56.5501	1.76639	1.03856	49.7148	60.8934	1	Single	Auto	57.1917	1.18355
	A06	Protein 5				Sample	55.1351	0.351437	1.19973	45.9697	60.7799	0	Single	Auto	56.1561	0.147945
	A07	Protein 6				Sample	54.3864	-0.397308	1.24013	44.2674	60.6097	0	Single	Auto	55.4164	-0.591774
	B01					NPC						0	Single	Auto
	B02	Protein 1				Reference	54.7563	-0.0273972	1.21803	43.3028	61.0069	0	Single	Auto	56.0082	0
	B03	Protein 2				Sample	54.9353	0.151619	1.19414	45.0618	61.0636	0	Single	Auto	55.8602	-0.147942
	B04	Protein 3				Sample	57.1264	2.34267	1.03444	49.5446	61.5176	1	Single	Auto	57.9315	1.92327
	B05	Protein 4				Sample	56.6982	1.91454	1.04096	50.3958	60.3827	1	Single	Auto	57.1917	1.18355
	B06	Protein 5				Sample	55.3666	0.582947	1.21006	45.2888	61.4041	0	Single	Auto	56.452	0.443832
	B07	Protein 6				Sample	54.3508	-0.432922	1.23276	44.3242	60.4962	0	Single	Auto	55.4164	-0.591774
	C01					NPC						0	Single	Auto
	C02	Protein 1				Reference	54.8015	0.0178108	1.20084	43.0191	61.0636	0	Single	Auto	56.0082	0
	C03	Protein 2				Sample	54.9352	0.15152	1.19215	45.0051	61.1204	0	Single	Auto	55.8602	-0.147942
	C04	Protein 3				Sample	57.2648	2.4811	1.01876	50.3958	61.2339	1	Single	Auto	57.9315	1.92327
	C05	Protein 4				Sample	56.6351	1.85136	1.01625	49.8851	60.6097	1	Single	Auto	57.1917	1.18355
	C06	Protein 5				Sample	55.2689	0.485153	1.20896	45.2888	61.2339	0	Single	Auto	56.3041	0.295887
	C07	Protein 6				Sample	54.3448	-0.438904	1.23254	44.3242	60.5529	0	Single	Auto	55.4164	-0.591774
							Average Tm B
		Protein 1					54.7837
		Protein 2					54.9464
		Protein 3					57.1509
		Protein 4					56.6278
		Protein 5					55.2569
		Protein 6					54.3607
					Average Tm B			Min/Max
			Replicate 1		Replicate 1	Replicate 2	Mean	Error
			wtXLF	Protein 1	54.6291	54.7837	54.7064	0.0773082
			XLFnoKBM	Protein 2	54.8068	54.9464	54.8766	0.0697675
			XLF1-285	Protein 3	57.0801	57.1509	57.1155	0.0353935
			XLF1-265	Protein 4	56.1703	56.6278	56.399	0.228753
			XLF1-245	Protein 5	54.8541	55.2569	55.0555	0.201367
			XLF L117D	Protein 6	54.0948	54.3607	54.2277	0.132946
					54.0948
					57.1509
				Range	3.05611
