# Supplementary material for: XLF acts as a flexible connector during non-homologous end joining
Source: eLife. 2020 Dec 8;9:e61920. doi: 10.7554/eLife.61920 (PMC7744095; doi:10.7554/eLife.61920)
Supplement: Figure 3—source data 1. [file elife-61920-fig3-data1.xlsx]

## Sheet: Sheet1
Fret Efficiency Histogram Data			2020 03 10-14b experiments.
			Raw data column is FRET efficiency data points pooled from multiple replicates to generate histogram (X and y values)
Buffer
Buff 0-15			Buff 15-30			Buff 30-45				WT 0-15			WT 15-30			WT 30-45				mut 0-15			mut 15-30			mut 30-45
Raw FRET Data	X-values	y-values	Raw FRET Data	X-values	y-values	Raw FRET Data	X-values	y-values		Raw FRET Data	X-values	y-values	Raw FRET Data	X-values	y-values	Raw FRET Data	X-values	y-values		Raw FRET Data	X-values	y-values	Raw FRET Data	X-values	y-values	Raw FRET Data	X-values	y-values
0.0582034	-0.983633	9.68195e-05	0.0147485	-0.955071	5.94318e-05	0.0842663	-0.909587	6.76636e-05		0.15849	-0.987535	0.000127836	-0.0495556	-0.971743	2.72717e-05	0.0876009	-0.91403	4.02398e-05		0.0899518	-0.982443	0.00012579	0.00350126	-0.97939	6.61223e-05	0.0484924	-0.984463	4.03633e-05
0.0362524	-0.959257	4.84097e-05	0.00797213	-0.930482	2.97159e-05	0.0116629	-0.885819	6.76636e-05		0.119604	-0.963119	0.000159795	-0.0361228	-0.946975	0	0.198454	-0.889876	4.02398e-05		0.0626096	-0.957566	3.14475e-05	0.00232391	-0.954524	0	0.0239624	-0.959544	0
0.0140218	-0.934881	7.26146e-05	0.00383938	-0.905892	2.97159e-05	0.025693	-0.862051	6.76636e-05		0.107125	-0.938703	9.58773e-05	-0.0241587	-0.922208	5.45435e-05	0.263976	-0.865723	0.000120719		0.0162459	-0.93269	6.28951e-05	0.00966052	-0.929658	6.61223e-05	-0.0598222	-0.934625	0
0.0391518	-0.910505	0	0.0196236	-0.881303	0	0.00126514	-0.838283	0.000202991		0.103766	-0.914287	3.19591e-05	-0.00726024	-0.897441	0	0.213828	-0.841569	4.02398e-05		0.0500704	-0.907813	0	0.0333313	-0.904792	6.61223e-05	0.022942	-0.909706	4.03633e-05
0.0436988	-0.886129	4.84097e-05	-0.00653043	-0.856713	2.97159e-05	0.0157662	-0.814515	6.76636e-05		0.109897	-0.889871	0.000127836	-0.0110772	-0.872674	5.45435e-05	0.187631	-0.817415	0		0.0595532	-0.882936	0.00012579	-0.020966	-0.879927	0	0.146102	-0.884787	8.07265e-05
0.0394522	-0.861753	0.000145229	0.0130913	-0.832124	2.97159e-05	0.0827939	-0.790746	6.76636e-05		0.103065	-0.865455	0.000127836	-0.0425037	-0.847907	5.45435e-05	0.278968	-0.793262	4.02398e-05		0.0526828	-0.85806	3.14475e-05	0.0192234	-0.855061	3.30611e-05	-0.0205637	-0.859868	4.03633e-05
0.043223	-0.837376	7.26146e-05	0.000109632	-0.807535	2.97159e-05	0.0797653	-0.766978	0.000135327		0.0962027	-0.841039	0.000223714	-0.124245	-0.823139	0	0.243487	-0.769108	0		0.0579319	-0.833183	6.28951e-05	0.0148085	-0.830195	3.30611e-05	0.154051	-0.834949	0
0.0135045	-0.813	4.84097e-05	-0.00461489	-0.782945	0	0.0973567	-0.74321	0.000135327		0.10665	-0.816623	0.000191755	-0.0821824	-0.798372	0	0.242394	-0.744954	4.02398e-05		0.0520961	-0.808306	3.14475e-05	-0.017787	-0.805329	9.91834e-05	-0.00460776	-0.81003	0
0.00461323	-0.788624	2.42049e-05	0.00662256	-0.758356	8.91477e-05	0.0540336	-0.719442	0.000135327		0.0846193	-0.792206	0.000159795	0.0640142	-0.773605	2.72717e-05	0.21755	-0.720801	4.02398e-05		0.0171964	-0.78343	6.28951e-05	0.0141794	-0.780463	0.000132245	0.0597432	-0.78511	4.03633e-05
0.0361206	-0.764248	0	-0.00395013	-0.733766	2.97159e-05	0.0756171	-0.695674	6.76636e-05		0.0926115	-0.76779	0.000159795	-0.0949359	-0.748838	5.45435e-05	0.290339	-0.696647	0		0.0380554	-0.758553	9.43426e-05	0.0104747	-0.755598	0	0.166095	-0.760191	4.03633e-05
0.0328121	-0.739872	0	0.0287468	-0.709177	5.94318e-05	0.126016	-0.671906	0.000202991		0.06198	-0.743374	0.000287632	-0.0154824	-0.724071	0	0.205906	-0.672493	4.02398e-05		0.0532081	-0.733677	3.14475e-05	0.0348081	-0.730732	0.000132245	0.154953	-0.735272	4.03633e-05
0.0348176	-0.715496	0.000169434	0.00355007	-0.684587	0.00014858	0.119611	-0.648138	0.000135327		0.0970724	-0.718958	0.000255673	0.160121	-0.699303	8.18152e-05	0.344172	-0.64834	0.000120719		0.0359709	-0.7088	9.43426e-05	0.0613446	-0.705866	9.91834e-05	-0.0639046	-0.710353	0.000161453
0.0332846	-0.69112	7.26146e-05	0.0410197	-0.659998	5.94318e-05	0.0138221	-0.62437	0		0.0749043	-0.694542	0.000255673	0.125984	-0.674536	8.18152e-05	0.211777	-0.624186	0		0.041238	-0.683923	0.00012579	0.0290844	-0.681	3.30611e-05	0.0256669	-0.685434	8.07265e-05
0.00857801	-0.666743	0.000121024	0.0287583	-0.635408	2.97159e-05	0.275873	-0.600602	0		0.0864618	-0.670126	0.000479386	-0.0493659	-0.649769	2.72717e-05	0.219036	-0.600032	8.04797e-05		0.0364178	-0.659047	6.28951e-05	-0.01859	-0.656134	6.61223e-05	0.0715807	-0.660515	8.07265e-05
0.00181542	-0.642367	9.68195e-05	0.00383358	-0.610819	0.00014858	0.114134	-0.576834	6.76636e-05		0.0511704	-0.64571	0.000319591	0.0319892	-0.625002	0.000109087	0.198174	-0.575879	8.04797e-05		0.0466151	-0.63417	3.14475e-05	0.0382546	-0.631269	6.61223e-05	0.0832887	-0.635596	0.00012109
0.0300718	-0.617991	7.26146e-05	0.0144208	-0.58623	8.91477e-05	0.032868	-0.553066	0.000270654		0.0541065	-0.621294	0.00035155	0.039164	-0.600235	8.18152e-05	0.206214	-0.551725	0.000160959		0.0582013	-0.609294	6.28951e-05	-0.0188376	-0.606403	3.30611e-05	0.201384	-0.610677	0.00012109
0.0289939	-0.593615	0.000145229	-0.0112085	-0.56164	0.000237727	0.13106	-0.529298	0.000135327		0.0671452	-0.596878	0.000511345	0.149326	-0.575467	5.45435e-05	0.23631	-0.527571	8.04797e-05		0.0604688	-0.584417	0.000220133	0.0215475	-0.581537	0	0.172768	-0.585758	8.07265e-05
0.0227191	-0.569239	0.000193639	0.0118973	-0.537051	5.94318e-05	0.0846502	-0.50553	6.76636e-05		0.0807492	-0.572461	0.000479386	-0.0918951	-0.5507	0.000136359	0.1732	-0.503418	0.000160959		0.0463836	-0.55954	6.28951e-05	-0.00278978	-0.556671	0.000132245	0.0711017	-0.560838	0.00024218
0.027774	-0.544863	0.000121024	-0.039607	-0.512461	0.000178295	0.142127	-0.481761	0.000202991		0.0314117	-0.548045	0.000639182	-0.116475	-0.525933	0.000218174	0.300767	-0.479264	8.04797e-05		0.0465446	-0.534664	0.00025158	0.0235177	-0.531805	9.91834e-05	0.274646	-0.535919	0.00012109
0.0109323	-0.520486	0.000145229	-0.0142721	-0.487872	0.000297159	0.0744719	-0.457993	0.000338318		0.0655886	-0.523629	0.000862895	-0.00141856	-0.501166	8.18152e-05	0.252969	-0.455111	0.000120719		0.0409984	-0.509787	0.000283028	0.0145529	-0.50694	9.91834e-05	-0.00438176	-0.511	4.03633e-05
0.0191828	-0.49611	0.000169434	-0.0119779	-0.463282	0.00014858	0.0549626	-0.434225	0.000270654		0.0476124	-0.499213	0.000735059	-0.312264	-0.476398	5.45435e-05	0.260576	-0.430957	0.000321919		0.0485649	-0.48491	0.00025158	-0.00970007	-0.482074	9.91834e-05	0.14711	-0.486081	0.00012109
0.00750224	-0.471734	0.000314663	0.0358842	-0.438693	0.00014858	0.0895044	-0.410457	0.000541309		0.0706357	-0.474797	0.0007031	0.0872039	-0.451631	0.000218174	0.190292	-0.406803	0.000160959		0.0706078	-0.460034	0.000534608	0.0209541	-0.457208	0.000231428	0.158498	-0.461162	0.00024218
0.0158144	-0.447358	0.000338868	-0.0279313	-0.414103	0.000416023	-0.0264269	-0.386689	0.000338318		0.0848955	-0.450381	0.000830936	0.136181	-0.426864	0.000190902	0.231493	-0.38265	0.000160959		0.0415941	-0.435157	0.000283028	0.050557	-0.432342	9.91834e-05	0.0751462	-0.436243	0.00012109
0.0149334	-0.422982	0.000290458	0.0287885	-0.389514	0.000297159	0.0854048	-0.362921	0.000338318		0.0704593	-0.425965	0.000735059	0.0476395	-0.402097	0.000299989	0.202069	-0.358496	0.000523118		0.0339818	-0.410281	0.000283028	0.0393425	-0.407476	0.000231428	-0.0946651	-0.411324	0.00012109
0.0519583	-0.398606	0.000484097	0.0382468	-0.364925	0.000267443	-0.0825518	-0.339153	0.000405981		0.0872596	-0.401549	0.000830936	-0.412294	-0.37733	0.000354533	0.179686	-0.334342	0.000402398		0.0329709	-0.385404	0.00050316	-0.0160882	-0.382611	0.000165306	0.21631	-0.386405	0.000201816
0.0488075	-0.37423	0.000484097	0.019953	-0.340335	0.000832046	-0.826737	-0.315385	0.00094729		0.102013	-0.377133	0.00143816	0.0829351	-0.352562	0.000572706	0.209521	-0.310189	0.000603597		0.0373191	-0.360527	0.000534608	-0.0289107	-0.357745	0.000363672	-0.0892709	-0.361486	0.000484359
0.0217774	-0.349853	0.000701941	0.00549804	-0.315746	0.000921193	-0.0321257	-0.291617	0.000676636		0.0517013	-0.352716	0.00150208	0.130067	-0.327795	0.000709065	0.222313	-0.286035	0.000724317		0.0692644	-0.335651	0.000849083	-0.00811772	-0.332879	0.000495917	0.192185	-0.336566	0.000807265
0.0195057	-0.325477	0.00108922	-0.02649	-0.291156	0.00104006	0.151859	-0.267849	0.00128561		0.0727304	-0.3283	0.00169383	0.0479436	-0.303028	0.000763609	0.294507	-0.261881	0.00112672		0.0291741	-0.310774	0.000754741	0.0344183	-0.308013	0.000892651	-0.012492	-0.311647	0.000847629
-0.00349951	-0.301101	0.00116183	0.0173685	-0.266567	0.00118864	0.0995195	-0.244081	0.00135327		0.0728518	-0.303884	0.00233301	-0.275355	-0.278261	0.000981782	0.198177	-0.237728	0.00128767		0.0395036	-0.285898	0.00122645	0.0257846	-0.283147	0.000793467	0.129998	-0.286728	0.000686176
-0.0484381	-0.276725	0.00121024	-0.0106197	-0.241977	0.00154523	0.110626	-0.220313	0.00155626		0.0723468	-0.279468	0.00262065	0.116261	-0.253494	0.00100905	0.137077	-0.213574	0.00173031		0.0295808	-0.261021	0.00147803	0.0333184	-0.258282	0.00125632	0.0664502	-0.261809	0.00117053
-0.0258423	-0.252349	0.00130706	0.0349817	-0.217388	0.00190182	0.00424274	-0.196544	0.00318019		0.0815485	-0.255052	0.0036753	-0.144953	-0.228726	0.0016363	0.226479	-0.18942	0.00225343		0.0258152	-0.236144	0.00204409	0.0283852	-0.233416	0.00201673	0.0184968	-0.23689	0.00129162
-0.03164	-0.227973	0.00222685	0.0356328	-0.192798	0.00193153	-0.0193626	-0.172776	0.00433047		0.0712847	-0.230636	0.00409076	0.063687	-0.203959	0.00237264	0.224081	-0.165267	0.00338015		0.027723	-0.211268	0.00292462	0.0693842	-0.20855	0.00247958	0.0326914	-0.211971	0.00181635
0.0262631	-0.203597	0.00312243	-0.0116928	-0.168209	0.00362534	0.0821788	-0.149008	0.00554841		0.0358715	-0.20622	0.0049217	0.0116003	-0.179192	0.00403622	0.263932	-0.141113	0.00507022		0.0330136	-0.186391	0.00393094	0.0259949	-0.183684	0.00350448	-0.0054057	-0.187052	0.00294652
0.0137027	-0.17922	0.00426006	0.0532885	-0.143619	0.00573517	-0.0253604	-0.12524	0.00852561		0.0799103	-0.181804	0.00744647	0.105286	-0.154425	0.00515436	0.153576	-0.116959	0.00788701		0.0554506	-0.161515	0.00550332	0.0146304	-0.158819	0.00525672	0.00510357	-0.162133	0.00411705
0.00952651	-0.154844	0.00706782	0.0435697	-0.11903	0.00906335	0.0831503	-0.101472	0.0124501		0.0471122	-0.157387	0.0089805	-0.0110997	-0.129657	0.00763609	0.192212	-0.0928056	0.009899		0.0560426	-0.136638	0.00858518	0.0428574	-0.133953	0.00793467	0.292896	-0.137214	0.00621594
0.0162736	-0.130468	0.00885898	0.0661353	-0.0944406	0.0166409	0.0100455	-0.0777041	0.0205021		0.0588228	-0.132971	0.0135507	-0.26747	-0.10489	0.0124905	0.282445	-0.0686519	0.0136413		0.0534755	-0.111761	0.0130822	-0.00196327	-0.109087	0.01134	0.245759	-0.112294	0.0108174
0.0263016	-0.106092	0.0144503	0.0217879	-0.0698512	0.0267443	-0.0266832	-0.053936	0.0320725		0.0396448	-0.108555	0.0203899	0.0758925	-0.080123	0.0208901	0.198107	-0.0444982	0.0227757		0.0724454	-0.0868847	0.0226422	0.00154617	-0.0842211	0.0202665	0.0101383	-0.0873754	0.0169122
0.00785354	-0.0817158	0.0239628	0.0010467	-0.0452617	0.0470997	-0.00227453	-0.0301679	0.0572434		0.0509027	-0.0841391	0.0288591	0.00638167	-0.0553558	0.0347715	0.216146	-0.0203446	0.0333991		0.0570396	-0.062008	0.039844	-0.00883508	-0.0593553	0.0339538	0.130131	-0.0624562	0.0289001
0.0480471	-0.0573396	0.0416082	0.0464486	-0.0206723	0.0850767	0.0105519	-0.00639987	0.0867447		0.0535076	-0.059723	0.044519	-0.0184178	-0.0305886	0.0567525	0.114044	0.00380908	0.0459941		0.0353086	-0.0371314	0.0711972	-0.0279024	-0.0344895	0.062221	0.0816517	-0.0375371	0.0511806
0.0389667	-0.0329635	0.0712833	0.005703	0.00391718	0.145935	0.00215497	0.0173682	0.130591		0.0431119	-0.0353069	0.0704698	0.0641008	-0.0058214	0.0838333	0.462106	0.0279627	0.0558529		0.065882	-0.0122548	0.121356	0.0125858	-0.00962375	0.107085	0.046454	-0.012618	0.0887588
0.00313167	-0.00858733	0.124389	-0.0157888	0.0285066	0.176334	0.0192718	0.0411363	0.153935		0.023835	-0.0108908	0.108565	-0.103167	0.0189458	0.0935421	0.361882	0.0521164	0.0533178		0.0273145	0.0126218	0.164879	0.0278223	0.015242	0.161371	0.0446658	0.0123011	0.135378
0.005419	0.0157888	0.172411	0.00693437	0.0530961	0.164775	0.108744	0.0649044	0.142161		0.0511823	0.0135253	0.132534	-0.0415881	0.043713	0.0809425	0.331027	0.0762701	0.0422116		0.0373737	0.0374984	0.169848	-0.0177855	0.0401078	0.172844	0.194082	0.0372202	0.167023
0.0322265	0.040165	0.162439	0.00692674	0.0776855	0.114674	-0.0218803	0.0886724	0.102037		0.0623657	0.0379414	0.127581	0.192277	0.0684802	0.0600251	0.408949	0.100424	0.03356		0.0517101	0.062375	0.120067	0.0662353	0.0649736	0.134327	0.0976878	0.0621393	0.143209
-0.0885542	0.0645411	0.122114	0.0316135	0.102275	0.0710805	-0.0216295	0.112441	0.0681372		0.0513315	0.0623575	0.100128	0.174338	0.0932474	0.0410985	0.27898	0.124577	0.0286508		0.0575115	0.0872516	0.082707	0.00178197	0.0898394	0.0950177	0.115674	0.0870584	0.107851
0.0272167	0.0889173	0.077625	0.0212007	0.126864	0.0399976	-0.0355177	0.136209	0.0474322		0.0682244	0.0867737	0.0695749	-0.108495	0.118015	0.0320443	0.368093	0.148731	0.0237415		0.0517692	0.112128	0.0526746	0.0538227	0.114705	0.0615268	0.0651706	0.111978	0.0690616
0.0304342	0.113293	0.0502735	0.0340762	0.151454	0.0232081	0.00116997	0.159977	0.029975		0.0524828	0.11119	0.0502077	-0.133535	0.142782	0.0235901	0.299492	0.172885	0.0233793		0.0515641	0.137005	0.0342149	0.0177534	0.139571	0.036764	0.0450522	0.136897	0.0482341
-0.018978	0.13767	0.0312727	-0.0198347	0.176043	0.0153037	0.0134222	0.183745	0.021314		0.0763588	0.135606	0.0335251	-0.214405	0.167549	0.0201538	0.205892	0.197038	0.019959		0.034179	0.161881	0.0219818	-0.014547	0.164437	0.0235726	0.113123	0.161816	0.0271645
-0.0128721	0.162046	0.0199932	-0.00278204	0.200633	0.00965767	0.0691917	0.207513	0.01448		0.0577291	0.160022	0.0243848	-0.136443	0.192316	0.0187084	0.438421	0.221192	0.0181079		0.0427887	0.186758	0.0149376	0.0678419	0.189303	0.0155718	0.175623	0.186735	0.0184864
0.0448277	0.186422	0.0121024	-0.0125143	0.225222	0.00674551	-0.0176588	0.231281	0.00933757		0.0465571	0.184438	0.0197188	0.0587217	0.217084	0.0155449	0.360562	0.245346	0.0193956		0.0405841	0.211635	0.00996887	0.0111975	0.214168	0.00962079	0.0345739	0.211654	0.0108577
0.00655003	0.210798	0.00832648	0.0196293	0.249812	0.00493284	0.0349307	0.255049	0.00669869		0.038494	0.208854	0.0139981	0.184888	0.241851	0.0152722	0.366536	0.269499	0.019798		0.0332359	0.236511	0.00676122	0.0325808	0.239034	0.00598406	0.0328233	0.236573	0.00774975
0.0169037	0.235174	0.00609963	0.060611	0.274401	0.00359563	-0.0394994	0.278817	0.00629271		0.0435579	0.23327	0.0108341	-0.0182149	0.266618	0.0154085	0.516457	0.293653	0.0212869		0.0190265	0.261388	0.00493726	0.0887222	0.2639	0.00446325	0.216077	0.261492	0.00629667
-0.0194838	0.25955	0.00435688	0.0394792	0.298991	0.00240699	0.0816001	0.302585	0.00412748		0.0341146	0.257686	0.00939597	0.189936	0.291385	0.0155994	0.435419	0.317807	0.0237013		0.0589594	0.286265	0.00286173	-0.00470197	0.288766	0.00290938	-0.00328311	0.286411	0.00367306
0.0128532	0.283926	0.00365494	0.00963082	0.32358	0.00163438	-0.0427526	0.326353	0.00378916		0.0627694	0.282103	0.00699904	0.185576	0.316152	0.0160358	0.429249	0.34196	0.0280069		0.0633133	0.311141	0.00232712	-0.0172569	0.313632	0.00148775	0.0537725	0.31133	0.00339051
-0.00870625	0.308303	0.00280776	-0.010381	0.348169	0.00136693	-0.0786004	0.350121	0.00263888		0.0641364	0.306519	0.00594439	0.0194324	0.34092	0.0171812	0.290403	0.366114	0.0305823		0.0585885	0.336018	0.00216988	0.0235363	0.338497	0.00175224	0.0452923	0.33625	0.00221998
0.00240895	0.332679	0.00239628	0.0105459	0.372759	0.00157494	-0.0913426	0.373889	0.0022329		0.0551835	0.330935	0.00479386	0.0858159	0.365687	0.0194993	0.401316	0.390268	0.0342039		0.030947	0.360894	0.00150948	-0.0161512	0.363363	0.00115714	0.0200112	0.361169	0.00189707
0.00375286	0.357055	0.00193639	0.0106591	0.397348	0.0013075	-0.563287	0.397657	0.0014886		0.0267033	0.355351	0.0050815	0.0968315	0.390454	0.0206447	0.510024	0.414421	0.0371414		0.0631543	0.385771	0.00106922	0.00964252	0.388229	0.000958773	0.0559628	0.386088	0.00108981
-0.000479651	0.381431	0.00181537	0.0485178	0.421938	0.000891477	-0.123316	0.421426	0.0014886		0.0547418	0.379767	0.00463407	0.150252	0.415221	0.0252264	0.203286	0.438575	0.0406422		0.0419526	0.410648	0.00106922	-0.0664546	0.413095	0.000727345	0.12316	0.411007	0.0012109
-0.00709345	0.405807	0.00157332	0.0668895	0.446527	0.00118864	-5.1398e-05	0.445194	0.000744299		0.0603275	0.404183	0.00412272	-0.0135695	0.439988	0.0255263	0.234804	0.462729	0.0420506		0.0790043	0.435524	0.000628951	0.0212387	0.437961	0.000727345	0.0250159	0.435926	0.000887992
0.0460731	0.430183	0.00162173	0.0440658	0.471117	0.00109949	0.0064494	0.468962	0.00121794		0.0452376	0.428599	0.00444231	0.19232	0.464756	0.0270536	0.440742	0.486882	0.0385095		0.0394614	0.460401	0.000471713	-0.0333786	0.462826	0.000429795	0.166212	0.460845	0.0012109
0.0146001	0.45456	0.00089558	0.0480356	0.495706	0.000742898	-0.0241068	0.49273	0.000879626		0.0548407	0.453015	0.00418664	0.233703	0.489523	0.0268354	0.475762	0.511036	0.0371011		0.0447191	0.485277	0.000471713	0.00596552	0.487692	0.0005951	0.120265	0.485764	0.00129162
0.0278507	0.478936	0.000726146	0.040349	0.520296	0.000742898	-0.00721084	0.516498	0.000608972		0.0474899	0.477431	0.0043784	0.116649	0.51429	0.0255263	0.156282	0.53519	0.0323126		0.0462244	0.510154	0.000628951	0.0562004	0.512558	0.000429795	0.0910113	0.510683	0.00104945
0.0146866	0.503312	0.000580917	0.0141821	0.544885	0.000624034	0.0622688	0.540266	0.000744299		0.032253	0.501848	0.00498562	-0.17515	0.539057	0.0221719	0.380345	0.559343	0.0292141		0.046281	0.535031	0.000345923	0.091272	0.537424	0.000396734	0.0425083	0.535602	0.00149344
0.00824567	0.527688	0.000629327	0.02878	0.569474	0.000416023	0.0461843	0.564034	0.000473645		0.0533142	0.526264	0.00361138	0.165155	0.563824	0.0190902	0.404117	0.583497	0.0243049		0.0315874	0.559907	0.000345923	0.0604524	0.56229	0.000462856	0.0485475	0.560522	0.00189707
-0.0248218	0.552064	0.000217844	0.0205913	0.594064	0.000564602	-0.455449	0.587802	0.000676636		0.034541	0.55068	0.00319591	0.0464293	0.588592	0.0167176	0.288369	0.607651	0.0210454		0.0378978	0.584784	0.000188685	0.018302	0.587155	0.000429795	-0.00104423	0.585441	0.00238143
0.0214062	0.57644	0.000435688	-0.000898697	0.618653	0.000416023	-0.000339735	0.61157	0.000473645		0.0527171	0.575096	0.00287632	-0.00946835	0.613359	0.0140177	0.257303	0.631804	0.015935		0.0445216	0.609661	0.000157238	0.014925	0.612021	0.000132245	0.0734808	0.61036	0.00266398
-0.00962459	0.600816	0.000411483	-0.000563144	0.643243	0.000237727	0.0518214	0.635338	0.000405981		0.0505222	0.599512	0.00191755	0.0603924	0.638126	0.0112905	0.334465	0.655958	0.0126755		0.0410322	0.634537	0.000220133	-0.0355988	0.636887	0.000330611	0.0537322	0.635279	0.00205853
-0.0416945	0.625193	0.000314663	0.0384497	0.667832	0.000267443	0.53679	0.659106	0.000608972		0.0422587	0.623928	0.00159795	-0.229208	0.662893	0.00883604	0.312438	0.680112	0.00957708		0.0575894	0.659414	0.00025158	-0.0270914	0.661753	0.000198367	0.102361	0.660198	0.00250252
0.000768507	0.649569	0.000314663	0.000275275	0.692422	0.000208011	0.0575734	0.682874	0.000338318		0.0474945	0.648344	0.00204538	-0.0455619	0.687661	0.00782699	0.422108	0.704265	0.00700173		0.0362201	0.68429	0.000157238	0.0300963	0.686618	0.000231428	0.000846018	0.685117	0.00181635
0.0241232	0.673945	0.000169434	-0.0222173	0.717011	0.000118864	0.0327057	0.706643	6.76636e-05		0.0448607	0.67276	0.00182167	0.0353601	0.712428	0.00477255	0.45263	0.728419	0.00595549		0.0553109	0.709167	0.000157238	0.0506443	0.711484	0.000165306	0.0480976	0.710036	0.00129162
-7.2415e-05	0.698321	0.000193639	0.00635352	0.741601	0.000118864	0.0458416	0.730411	0.000270654		0.0419289	0.697177	0.00121445	0.204456	0.737195	0.00512709	0.279928	0.752573	0.0047483		0.0511583	0.734044	0.000157238	0.0345355	0.73635	0.000132245	-0.006362	0.734955	0.00100908
-0.0438108	0.722697	0.000121024	0.0300093	0.76619	5.94318e-05	-0.0261062	0.754179	0.000338318		0.0275698	0.721593	0.00108661	-0.0167106	0.761962	0.00340897	0.368864	0.776726	0.00342039		0.035434	0.75892	0.00012579	0.00981306	0.761216	0.000330611	0.0596152	0.759874	0.000605449
-0.0308582	0.747073	7.26146e-05	0.0260674	0.790779	0.000118864	0.00261283	0.777947	0.000202991		0.0392387	0.746009	0.00134228	0.038125	0.786729	0.00291808	0.331446	0.80088	0.00237415		0.0460799	0.783797	0.000283028	0.0239018	0.786082	0.000231428	0.057894	0.784793	0.000484359
-0.0210513	0.771449	9.68195e-05	-0.0148929	0.815369	0.000118864	0.0371691	0.801715	0.000135327		0.0234904	0.770425	0.000575264	0.0872059	0.811497	0.00190902	0.334099	0.825034	0.00160959		0.042952	0.808673	9.43426e-05	0.0371447	0.810947	0.000165306	0.0303009	0.809713	0.000403633
0.0409256	0.795826	0.000121024	0.00658447	0.839958	0.000118864	0.0607512	0.825483	0.000541309		0.0174181	0.794841	0.000511345	0.0848458	0.836264	0.00169085	0.367377	0.849187	0.00140839		0.0592482	0.83355	0.00012579	0.0274799	0.835813	0.000264489	0.10781	0.834632	0.000443996
0.0374683	0.820202	7.26146e-05	0.0294787	0.864548	0.000118864	0.109136	0.849251	0.000270654		0.011917	0.819257	0.000255673	0.0334894	0.861031	0.00174539	0.259074	0.873341	0.00120719		0.057692	0.858427	0.00012579	0.000582588	0.860679	0.000132245	0.127876	0.859551	0.000161453
-0.00038757	0.844578	0.000217844	0.0304856	0.889137	0	-0.00422865	0.873019	0.000338318		0.0339977	0.843673	0.000319591	0.0163186	0.885798	0.00128177	0.406372	0.897495	0.00112672		0.0112083	0.883303	6.28951e-05	0.060294	0.885545	0.000264489	0.0115126	0.88447	0.000201816
0.00569627	0.868954	9.68195e-05	0.0319336	0.913727	0.000118864	-0.000791379	0.896787	6.76636e-05		0.0413213	0.868089	0.000191755	0.0892529	0.910565	0.00100905	0.290658	0.921648	0.000523118		0.0697017	0.90818	6.28951e-05	0.0440565	0.910411	0.000132245	0.159435	0.909389	0.000363269
-0.0102842	0.89333	7.26146e-05	0.00426508	0.938316	0.000118864	0.107712	0.920555	0.000202991		0.0459965	0.892505	0.000255673	0.0778783	0.935333	0.00079088	0.315145	0.945802	0.000482878		0.0592962	0.933057	9.43426e-05	0.0112678	0.935276	0.000165306	0.186499	0.934308	0.00012109
0.00141369	0.917706	9.68195e-05	0.0161083	0.962906	5.94318e-05	-0.0963604	0.944323	0.000135327		0.0291972	0.916922	0.000223714	-0.104475	0.9601	0.000872696	0.428404	0.969956	0.000362158		0.037653	0.957933	3.14475e-05	-0.00701469	0.960142	0.000198367	-0.0247047	0.959227	0.000282543
0.0241845	0.942083	2.42049e-05	0.0259032	0.987495	5.94318e-05	0.0559938	0.968091	0.000135327		0.0380299	0.941338	0.000191755	0.243813	0.984867	0.000409076	0.594914	0.994109	0.000281679		0.0627618	0.98281	0	0.0568608	0.985008	6.61223e-05	0.133604	0.984146	8.07265e-05
0.00530492	0.966459	2.42049e-05	0.0422403	1.01208	0	0.0552972	0.991859	0		0.0474952	0.965754	0.000127836	-0.00617908	1.00963	0.000545435	0.247783	1.01826	0.000402398		0.0669206	1.00769	3.14475e-05	-0.0134747	1.00987	0.000198367	0.0344236	1.00907	0.00024218
-0.0193542	0.990835	7.26146e-05	0.0285858	1.03667	8.91477e-05	0.00653614	1.01563	0.000202991		0.0363386	0.99017	6.39182e-05	-0.230234	1.0344	0.000272717	0.325711	1.04242	0		0.021195	1.03256	9.43426e-05	0.000795286	1.03474	6.61223e-05	0.0940421	1.03398	0.000201816
-0.00596958	1.01521	9.68195e-05	0.0467369	1.06126	2.97159e-05	0.103166	1.0394	0		0.0247556	1.01459	3.19591e-05	-0.163646	1.05917	0.000245446	0.493904	1.06657	0		0.0644682	1.05744	6.28951e-05	0.0229211	1.05961	0.000231428	0.131627	1.0589	8.07265e-05
0.0284469	1.03959	4.84097e-05	0.0569758	1.08585	2.97159e-05	0.078374	1.06316	0.000135327		0.0455246	1.039	3.19591e-05	-0.078537	1.08394	0.000272717	0.345163	1.09072	0		0.0290279	1.08232	0.000157238	0.037002	1.08447	3.30611e-05	0.0617485	1.08382	8.07265e-05
0.00406002	1.06396	9.68195e-05	0.0512358	1.11044	2.97159e-05	-0.00229559	1.08693	0		0.0171693	1.06342	3.19591e-05	0.190218	1.1087	0.000245446	0.206853	1.11488	0		0.0831955	1.10719	3.14475e-05	0.0228303	1.10934	3.30611e-05	-0.164457	1.10874	0
0.0233672	1.08834	0.000121024	0.0122049	1.13503	8.91477e-05	0.113514	1.1107	0		0.0437751	1.08783	3.19591e-05	0.0616147	1.13347	0.000190902	0.258664	1.13903	8.04797e-05		0.00959909	1.13207	9.43426e-05	0.0665018	1.1342	6.61223e-05	-0.0212431	1.13366	0.000161453
-0.02581	1.11272	4.84097e-05	0.0293125	1.15962	2.97159e-05	-0.0792787	1.13447	6.76636e-05		0.034192	1.11225	0	-0.0792129	1.15824	0.000136359	0.347333	1.16318	0		0.062898	1.15695	6.28951e-05	0.0601434	1.15907	9.91834e-05	0.0647669	1.15858	4.03633e-05
0.0226427	1.13709	4.84097e-05	-0.00555917	1.18421	5.94318e-05	0.00907198	1.15824	6.76636e-05		0.0393926	1.13667	0	-0.51012	1.183	0.00016363	0.427101	1.18734	0		0.0414245	1.18182	9.43426e-05	0.0278676	1.18393	6.61223e-05	0.0396362	1.1835	4.03633e-05
0.0187487	1.16147	4.84097e-05	0.0534882	1.2088	8.91477e-05	-0.0631032	1.182	6.76636e-05		0.0477573	1.16108	3.19591e-05	0.0937471	1.20777	0.00016363	0.32271	1.21149	0		0.0661292	1.2067	3.14475e-05	0.0377601	1.2088	6.61223e-05	0.0667866	1.20842	0.00012109
-0.0017596	1.18584	2.42049e-05	0.0483088	1.23339	0	0.0230274	1.20577	0		0.019309	1.1855	3.19591e-05	-0.0402159	1.23254	8.18152e-05	0.180428	1.23565	4.02398e-05		0.0569552	1.23158	0	-0.00911709	1.23367	6.61223e-05	0.0645948	1.23334	0
0.00708342	1.21022	2.42049e-05	0.0707269	1.25798	2.97159e-05	0.011713	1.22954	0.000135327		0.0310992	1.20991	0	-0.0615013	1.25731	0.000136359	0.29748	1.2598	0		0.0600473	1.25645	3.14475e-05	-0.0479405	1.25853	0	0.0929837	1.25826	0
0.0371776	1.2346	4.84097e-05	0.0324699	1.28257	0	0.0546838	1.25331	6.76636e-05		0.0349481	1.23433	0	-0.048612	1.28207	2.72717e-05	0.229901	1.28395	0		0.0614306	1.28133	6.28951e-05	0.0359961	1.2834	0	0.0151013	1.28318	8.07265e-05
0.0083143	1.25897	2.42049e-05	0.0337465	1.30716	2.97159e-05	0.22483	1.27708	0.000135327		0.0453012	1.25875	0	0.0561553	1.30684	2.72717e-05	0.190728	1.30811	0		0.0501999	1.30621	3.14475e-05	0.0560482	1.30826	6.61223e-05	0.0587294	1.30809	4.03633e-05
0.00307274	1.28335	2.42049e-05	0.034318	1.33175	5.94318e-05	0.04235	1.30084	6.76636e-05		0.0520917	1.28316	0	0.0846571	1.33161	5.45435e-05	0.28123	1.33226	0		0.0939047	1.33108	3.14475e-05	0.00709223	1.33313	3.30611e-05	0.39153	1.33301	0.000161453
-0.00538478	1.30772	2.42049e-05	-0.00760556	1.35634	0	0.0697205	1.32461	0		0.0371316	1.30758	0	-0.300302	1.35638	5.45435e-05	0.327501	1.35641	0		0.0704098	1.35596	6.28951e-05	0.0344231	1.35799	9.91834e-05	-0.138579	1.35793	0
0.00972736	1.3321	0	-0.00216356	1.38093	0	0.017786	1.34838	6.76636e-05		0.027606	1.332	3.19591e-05	-0.058224	1.38114	2.72717e-05	0.533862	1.38057	0		0.0607464	1.38084	6.28951e-05	0.0265015	1.38286	6.61223e-05	0.0284233	1.38285	0
0.044387	1.35648	2.42049e-05	-0.0207852	1.40552	2.97159e-05	0.0374447	1.37215	0		0.00846369	1.35641	3.19591e-05	-0.0525495	1.40591	5.45435e-05	0.405956	1.40472	0		0.0572086	1.40571	3.14475e-05	0.0417089	1.40773	6.61223e-05	0.234204	1.40777	0
0.0194809	1.38085	0	0.0212027	1.43011	2.97159e-05	0.116889	1.39592	0.000135327		0.00423591	1.38083	3.19591e-05	0.0305512	1.43068	5.45435e-05	0.379386	1.42888	0		0.0643205	1.43059	6.28951e-05	0.0325053	1.43259	6.61223e-05	0.0612602	1.43269	4.03633e-05
-0.000923855	1.40523	0	0.0048454	1.45469	2.97159e-05	0.108055	1.41968	0		0.0177492	1.40524	3.19591e-05	0.0632273	1.45544	0	0.385347	1.45303	0		0.0333673	1.45547	6.28951e-05	0.0282376	1.45746	0	0.0189215	1.45761	0
0.0193434	1.42961	2.42049e-05	0.0225947	1.47928	2.97159e-05	0.0346258	1.44345	6.76636e-05		0.0203406	1.42966	6.39182e-05	0.0201912	1.48021	2.72717e-05	0.482535	1.47718	8.04797e-05		0.0503042	1.48034	6.28951e-05	0.0685092	1.48232	6.61223e-05	-0.150851	1.48253	8.07265e-05
0.0230462			0.0122697			0.0970807				0.011476			0.116675			0.512794				0.0275708			0.0257358			0.101596
-0.0107791			0.0207873			-0.055451				0.0528015			-0.0760642			0.439322				0.0225265			0.0174037			0.0382427
-0.038158			-0.00665362			0.113419				0.0213977			0.114563			0.480071				0.04579			0.0259488			0.0552413
0.00685912			0.0371279			0.0509013				0.019702			-0.184574			0.532383				0.0356406			0.0463521			0.112157
0.0124784			-0.00648511			0.0323516				0.0190288			0.0207742			0.264883				0.0386535			0.0186897			-0.047565
0.02455			0.00431299			-0.0727155				0.026512			-0.167617			0.276074				0.017247			0.0347075			-0.0214807
0.0538089			0.0487096			0.0260015				0.0412804			-0.618624			0.459612				0.0388012			0.0024414			0.0393413
0.0054571			-0.00913542			0.00618925				-0.00272833			0.027764			0.546636				0.0443315			0.0242891			0.108233
0.0153572			0.0610544			0.135453				0.0443836			-0.254492			0.211053				0.0555251			0.0103491			-0.010632
0.0161326			0.0390902			0.129497				0.0248275			0.00515673			0.478697				0.0446316			0.0143459			0.152772
0.0157284			0.0509108			0.158716				0.0690731			-0.069768			0.125247				0.0281562			0.0155954			0.0878846
-0.033401			0.0278465			0.0148599				0.034483			0.112455			0.453129				0.0512034			0.0396466			-0.0244552
0.0491143			0.0228968			0.139205				0.00896799			-0.115519			0.412354				0.0251177			0.0228047			0.00670503
0.0143084			0.0201271			0.0384461				0.0157932			0.0471512			0.419589				0.0261689			0.0866767			0.110964
0.00478594			0.0271579			-0.0890286				-0.00110502			-0.0395057			0.443272				0.0535651			0.00559891			0.0268415
0.0263602			0.0433929			0.326662				0.00905232			0.0522052			0.485625				0.0804495			0.0222919			0.0682049
0.0166964			0.0260104			0.0228592				0.0540749			-0.288904			0.630481				0.0459813			0.0526972			0.129135
-0.00196187			0.0423141			0.0804576				0.0347722			-0.0132634			0.711126				0.0287173			-0.0208844			0.0345454
0.0031098			0.0230449			0.188316				0.0291666			-0.0908586			0.587721				0.0765471			0.0184095			0.0364626
0.0179771			-0.0199674			0.0199404				0.0374884			0.0362051			0.598153				0.0198132			-0.0115836			0.0697786
0.00193123			0.0381185			0.0554946				0.0228663			0.103714			0.634706				0.0362182			-0.0293557			0.124774
0.00875449			-0.0171527			0.0213207				0.0545909			0.0135637			0.622038				0.0549782			0.0321206			-0.0251756
0.0255852			0.00469912			0.122261				0.00280101			0.121848			0.629491				0.0446679			-0.00249838			0.167193
-0.00172751			0.0436715			0.0163687				0.0259404			-0.229912			0.617078				0.0488643			-0.0177447			-0.114774
0.00202118			0.0257416			0.102597				0.0268093			-0.0766892			0.559299				0.0979533			0.017682			0.0644152
0.00568265			0.00875642			0.0701486				0.0431792			0.0717866			0.639445				0.0459879			0.0443189			0.0116479
-0.00375212			-0.0136872			0.0981505				0.00300134			-0.12254			0.635445				0.0486723			0.0191076			0.0229652
-0.0115187			0.0186292			0.0776259				0.0472554			0.0731536			0.594514				0.0454158			0.00178246			0.0725316
-0.00704021			0.0957587			0.0377055				0.0252512			0.00846073			0.577603				0.0221862			0.020851			0.0569143
0.0146862			-0.0610891			0.0600846				0.00983064			-0.175343			0.621723				0.0383174			-0.000122771			0.0519958
0.0111375			0.0189421			-0.0363798				0.0277281			0.0874465			0.67486				0.0412471			0.0282252			0.141162
-0.00998658			-0.042907			-0.0594096				0.0431571			-0.071632			0.53612				0.0532488			-0.0190563			0.124633
0.0399187			0.0351913			0.372133				0.026788			-0.0260782			0.723687				0.0384636			0.0294746			0.181917
0.0277386			0.0674449			0.0702703				0.0357259			0.00951438			0.657248				0.0437179			-0.0525565			-0.0281251
-0.00876256			0.0830507			-0.0446955				0.0414327			0.00169131			0.613943				0.00844952			0.0432739			0.0654071
0.0143918			0.0175136			-0.0250744				0.0397171			0.0155214			0.596498				0.0285697			-0.0187887			0.0638616
-0.00875892			0.0816743			0.0688939				0.02608			-0.0467448			0.616211				0.027407			0.0704599			-0.00204889
0.0177422			0.0562694			-0.104287				0.0348296			-0.0697087			0.655222				0.0484786			0.0221721			0.0329598
-0.0149461			0.120476			0.0199616				0.0417808			-0.138252			0.583131				0.0713035			0.00644269			0.0348432
-0.000186673			0.152776			0.0547231				0.0430228			0.0760201			0.679675				0.0521312			0.00732125			0.125727
0.0177468			0.0857221			0.0760521				0.0434201			0.0389329			0.574047				0.0486073			-0.00112622			0.0520936
0.0219064			-0.0224681			-0.0656927				0.0376987			0.205455			0.673898				0.0505758			-0.00265202			0.0262485
-0.0127419			0.063112			-0.150943				0.0327759			-0.270348			0.767654				0.06009			0.0290287			0.090998
-0.00278783			0.0469185			-0.106366				0.033334			-0.180735			0.75547				0.0279128			0.0107996			0.162293
-0.0108034			0.152885			-0.0732912				0.0435949			0.027677			0.656405				0.0240296			0.0737344			-0.00238711
0.0402241			0.0404257			0.0616607				0.0831823			0.0523893			0.682525				0.0477925			3.04495e-05			0.0393642
0.0196371			-0.0799603			0.0841269				0.0576433			0.0138553			0.629971				0.0416291			0.0744786			-0.0134886
0.00948453			-0.0792082			0.0235105				0.0481065			0.0558132			0.601824				0.0318738			0.0761458			0.014296
-0.00579672			-0.0957008			-0.048029				0.0479229			-0.0421134			0.660748				0.0129071			0.0977248			-0.0276738
-0.0442281			-0.0602879			0.0273108				0.022348			-0.00562995			0.643942				0.0123226			0.0526432			0.129426
-0.0301119			0.117467			-0.0375526				0.0268927			-0.0182199			0.666273				-0.00281956			0.137061			0.201433
0.0052431			0.0639591			0.00556937				0.0340372			-0.00352456			0.60844				0.0219284			0.00186689			0.15864
0.0345038			0.056811			-0.666984				0.0306024			0.019961			0.6145				0.0584653			-0.048247			-0.183745
-0.0101864			-0.0819339			-0.211186				0.0405373			-0.0355276			0.687385				0.0491098			-0.327057			-0.0609356
0.032058			0.00124216			0.0908515				0.0313576			-0.0562219			0.676646				0.0484802			0.0718199			0.0353258
0.000504443			0.0702774			0.00880964				0.0285812			0.0609805			0.566497				0.0111163			0.110224			-0.0203928
0.0458154			-0.0556053			0.017746				0.0414204			0.0587845			0.592024				0.0431214			0.0582904			0.0813131
0.0018443			-0.0470303			0.135267				0.0449102			0.0531784			0.553142				0.0455939			0.256567			-0.035547
0.00171045			0.00775592			0.0824724				0.0117412			-0.030425			0.553437				0.0322056			0.202027			0.131501
0.0106244			-0.0283749			-0.0863413				0.0282947			0.0319806			0.597499				0.0332448			-0.0236692			0.108678
-0.00637325			-0.0604214			0.0505533				0.0409838			-0.0440773			0.569552				0.0508474			0.0643365			-0.0335661
0.0217035			0.167551			-0.114898				0.00660954			-0.00050673			0.645744				0.03189			0.16035			-0.0410659
0.00804829			-0.0358633			0.154248				0.024563			0.00110879			0.670864				0.0104039			-0.0393871			0.105623
0.0404138			0.082119			-0.0208824				-0.005047			0.0743338			0.604087				0.0137527			-0.0521217			0.0797357
0.0167949			0.0591381			-0.100086				0.0315246			0.0268369			0.38331				0.0121893			0.00252909			0.149844
-0.0150487			0.0496563			-0.00572998				0.0432506			-0.0486985			0.580671				0.00797528			-0.00578315			0.0350763
-0.00207777			0.0643772			0.0940674				0.0306353			0.00970395			0.493494				0.0351791			0.0850818			0.0630069
0.00728038			0.0794328			0.0104549				0.0256722			0.00860785			0.43039				0.00245526			0.2084			0.152689
0.0206961			0.0132316			-0.153401				0.00478621			0.0702129			0.316059				-0.00655625			0.0891273			-0.0742604
-0.0225529			0.0585433			-0.0880333				0.0313486			-0.0218081			0.409716				0.0318			0.0721769			0.0297599
0.00421395			0.076713			-0.0962113				0.041968			0.0336672			0.377315				0.0438015			0.0230643			-0.0511766
0.0207229			0.0512455			-0.12713				0.0375127			-0.0343525			0.476226				0.0166985			0.013397			-0.0356735
0.0188399			0.0156346			-0.00728133				0.0259919			0.050294			0.285116				0.0339901			0.142994			0.0251818
0.0104991			0.0251494			-0.00903101				0.00738317			0.0504136			0.409677				0.011559			-0.00689298			0.0926432
0.00534347			0.0498001			0.107499				0.0386319			0.141858			0.381734				0.00590952			0.0793896			0.108589
-0.0166641			0.0533052			-0.029086				0.0283383			-0.0246726			0.345209				0.0104335			0.0444114			0.00343734
-0.00271299			-0.0383668			0.0744542				0.029491			0.0804186			0.418238				0.0244771			0.0640608			0.116013
0.0398429			-0.00247053			0.145872				0.0309934			0.0331184			0.682839				0.00648221			0.176755			-0.0217836
0.0251804			0.0416057			0.00873649				0.0545849			-0.00198629			0.484411				0.0036969			-0.197385			-0.0870309
0.0277588			0.0781997			0.0591495				0.0202831			0.150823			0.35065				0.0304419			0.0582637			0.00108059
0.0338748			0.0421394			-0.0935486				0.0445606			-0.0535251			0.302074				0.0410421			-0.156339			0.0524395
0.0410307			0.0928134			0.0831187				-0.133462			0.0219702			0.374362				0.0823044			-0.0206215			-0.0435994
0.0100098			0.143057			-0.0533386				0.0480789			-0.0170582			0.534528				0.0206797			-0.0941436			0.0133944
0.0206562			-0.08043			-0.0551928				0.0387957			-0.204213			0.482768				0.0561027			0.0762098			0.0245678
0.00821668			0.119159			0.118895				0.0198633			0.0165899			0.321525				0.0143762			0.00321038			0.0160804
-0.00971366			0.0274256			0.0353881				0.0341796			0.0435589			0.46208				0.039153			0.110804			0.0205274
0.020822			-0.00520902			0.0633879				0.0566913			-0.0248028			0.390157				0.0271494			0.11097			-0.0306606
-0.00563932			0.0829486			-0.0463745				0.0467634			0.064085			0.41247				0.0462957			0.00635086			-0.0159418
-0.022006			0.0156218			-0.0371338				0.0233108			0.0878594			0.41389				0.0209852			0.041631			0.0188246
0.0213247			0.0199996			0.00571978				0.0240305			0.00267889			0.0369483				0.0622384			-0.159303			0.0523163
0.0280128			0.0509431			-0.186903				0.022458			-0.0182932			0.358446				0.0503469			0.00595461			0.0148627
0.000824167			0.0774497			-0.184028				0.00462566			0.0613254			0.349252				0.0412855			0.0163233			0.33461
0.0459859			-0.00452053			0.0193106				0.0356076			-0.0468762			0.219724				0.0157617			0.101878			0.0504525
0.00316171			0.0444675			0.0624736				0.0198324			-0.0825346			0.374913				0.0407358			-0.247561			0.0599719
0.00378693			-0.0239997			0.00321832				0.0352601			0.026999			0.585382				0.0198063			0.0645611			0.12049
0.00906413			0.0594555			0.0123788				0.0312499			0.0194212			0.49406				0.0127515			-0.18057			0.0448469
0.000896694			0.0355702			0.047122				0.0136157			0.0348517			0.342165				0.0204317			0.0233777			0.0415833
-0.00637665			0.061316			0.0901316				0.0405323			0.0059498			0.303833				0.00560226			0.0266933			0.0810266
0.024332			0.122195			0.145321				0.0294475			-0.0834416			0.403745				0.0524757			0.0813211			0.04948
0.0175847			0.0876615			0.0281376				0.0450122			-0.069733			0.413464				0.0580895			0.0404983			0.0487644
0.0267175			0.0424704			0.0499373				0.0408897			-0.0458036			0.339399				0.0637067			-0.0250978			0.0461754
0.027216			-0.00736041			0.0601247				0.0481492			0.0475534			0.349331				0.00318175			0.119508			-0.0207967
-0.0168981			-0.0179218			0.0685444				0.0171298			0.0414522			0.288953				0.0357902			0.19454			0.159466
-0.00733438			-0.0716635			0.0729592				0.0270256			0.160824			0.4187				0.0544664			-0.181082			0.00229502
0.0223526			0.0371093			0.00934213				0.0359721			-0.154622			0.382643				0.00526055			0.0372122			-0.00821988
0.0626141			0.0225105			0.117927				0.0292199			-0.0231037			0.451252				0.0270011			-0.00834478			0.0642445
0.00240268			-0.0582148			0.0821513				0.02068			0.124871			0.511852				0.0333152			-0.00415038			0.111065
0.0173344			0.0193869			0.0749591				0.0174321			0.095618			0.516228				0.0796471			-0.0304365			0.101585
0.0200741			0.074792			0.0050249				-0.00703343			0.0594997			0.427946				6.53122e-05			-0.0962117			0.02937
-0.00249099			0.0404117			0.0397011				0.0165984			-0.0529195			0.353222				0.0121013			-0.0165181			0.0237473
-0.00413463			0.226347			0.0206237				0.0461033			-0.0145304			0.37327				0.0459948			-0.0186902			0.184371
0.0278587			0.0596031			0.037379				0.0334406			-0.0203585			0.355732				0.0257767			0.0457313			0.0841527
-0.000116799			-0.0338195			0.0387429				0.0184869			-0.0180124			0.283166				0.00461495			0.0911361			0.185396
0.0209891			0.00850848			0.0163586				0.00780892			0.110292			0.193824				-0.00588558			-0.0387196			0.0840574
-0.00670057			-0.00238622			0.0339811				0.0357492			-0.058391			0.488438				0.0323806			-0.0430797			0.0479379
0.0426872			0.0595837			0.0301305				0.0414121			-0.0673954			0.179996				0.0359583			-0.00683611			0.0614671
-0.00011384			0.00376443			0.0631107				0.0357804			0.0436544			0.368518				0.0370482			-0.0113424			0.0315716
0.0246235			0.143231			0.0467827				0.0261726			-0.0405766			0.485199				0.0628621			0.0731636			0.00400476
0.0273853			-0.0522713			0.0671708				0.0328297			0.093689			0.26361				0.0429119			0.0361955			0.0165431
0.0625248			0.0157117			0.0973883				0.0213051			-0.0432731			0.302413				-0.0167412			-0.0127747			0.0277523
0.0313596			0.0467315			0.180059				0.0423498			-0.105193			0.520768				0.0454499			-0.00763391			0.0689912
0.00267796			-0.0956643			0.0754253				0.0381912			-0.00569124			0.263915				0.0604067			0.0199766			0.0578531
0.0164516			-0.0443109			-0.0482572				0.0612382			0.1192			0.30949				0.0368196			-0.0781438			0.0389703
0.011562			0.0550745			0.237954				0.0433981			0.0630749			0.385453				0.0934446			0.0853567			0.0594467
0.0308276			0.00678007			0.229846				0.0307726			-0.0762792			0.426285				0.0805839			-0.0683692			0.0753158
-0.00302235			0.0512179			0.0639242				0.0340587			-0.0372985			0.475483				0.00236156			0.0871885			0.147951
0.00323308			0.0791222			-0.242633				0.0413879			-0.023611			0.38898				0.0467496			-0.129871			0.00966341
0.0437122			0.0590456			0.0752911				0.0445292			0.0924209			0.436758				0.035745			0.0358289			0.0127472
-0.0311543			0.067427			0.025418				0.0240706			0.0245849			0.466136				0.0302828			0.147405			0.0780415
-0.0367276			0.0388182			-0.0234934				0.0411357			-0.0873543			0.333686				-0.0127192			0.112627			0.0544595
0.0315158			-0.0267083			0.0463548				0.0382038			-0.0359011			0.272711				0.0746699			0.0610762			0.0849941
0.0543175			-0.0378698			-0.0804839				0.0406998			-0.0046364			0.392979				0.0454405			0.154405			0.0907419
-0.0381991			0.027711			-0.0112873				0.0571784			0.0899203			0.435777				0.0097759			0.0232829			0.190014
-0.0113111			-0.1369			-0.00327028				0.0292201			0.0228336			0.243033				0.0365071			0.0538596			0.0513077
0.0311418			-0.0667867			0.0626619				0.0533438			-0.0511795			0.459548				0.0223975			0.0292918			0.048557
0.0529991			0.0409479			0.0342996				0.0308959			0.0462889			0.44777				0.0381914			0.0275253			0.176103
0.0264524			-0.12547			0.0702195				0.0477039			-0.0994741			0.404296				0.00600296			0.0690515			0.139806
0.00931989			0.0683001			-0.0170293				0.0538603			-0.0251095			0.46427				0.00818399			0.176095			0.0954055
-0.0323419			-0.131886			-0.216052				0.0299548			0.0530235			0.0834928				-0.0152761			0.0404593			0.079227
0.0202712			0.0994022			0.106891				0.0343933			-0.00692501			0.0808416				0.0675774			-0.0847644			0.185295
0.00112993			0.114728			0.0404811				0.0462519			-0.0695168			0.0552802				0.0292052			-0.016018			0.109457
0.0277785			0.109004			0.00945338				0.070008			0.0247656			0.0882853				0.0342687			0.171735			0.272576
-0.0426112			0.0963995			0.0778316				0.0775876			-0.0932629			0.0780329				0.00783177			-0.0352354			0.0416016
-0.00423452			-0.131373			-0.0435164				0.0536458			-0.00531652			0.0852827				0.0435547			0.0632556			-0.00577358
0.033941			0.0467828			0.0180197				0.0627728			0.000345801			0.087394				0.0379177			-0.0558438			0.107183
0.0520035			-0.0382322			0.0369051				0.0353459			0.0235488			0.0607018				0.0338002			0.0248311			0.172923
0.0284358			-0.0322018			0.117419				0.0438864			0.044126			0.0664089				0.0941649			-0.114046			0.0711101
0.0417608			-0.0223712			0.0883518				0.0475144			-0.100816			0.0748488				0.0524293			-0.0422673			0.263702
0.0649799			0.016951			-0.0208404				0.0494558			0.0288276			0.121299				0.0327566			0.0393765			-0.0856944
0.0367243			0.151918			0.0499566				0.0516306			0.0925608			0.115554				0.0495328			0.0703754			0.136418
0.0157606			0.0619417			0.0135541				0.030178			0.0649053			0.112308				0.0552266			0.00258962			0.043012
0.00911607			0.10568			-0.0680726				0.0487815			0.0104499			0.109785				0.0988873			0.0895473			0.0126954
0.00138609			0.174309			0.281572				0.0504258			0.000878053			0.0649253				0.050342			-0.0327805			0.12171
0.0332955			0.160015			0.174805				0.0303249			0.0512108			0.0855111				0.0819955			-0.0788266			0.0457724
0.00426888			0.0482323			0.109949				0.0259787			-0.00431417			0.0727167				0.0557219			0.0308219			0.0757139
-0.000377229			0.168959			0.268717				0.0612899			0.040681			0.114356				0.0236533			-0.00467207			-0.0488538
-0.0169767			0.222704			0.942713				0.0486607			-0.0103324			0.113334				0.0762644			-0.156648			0.204173
0.0159029			-0.0926526			0.0759117				0.0361388			0.0589414			0.100677				0.0251073			-0.0381403			-0.0130675
0.0187741			-0.0930559			0.0486389				0.048246			0.0147968			0.0993764				0.0545248			0.0632818			0.0110325
0.0027146			0.0109267			0.0558552				0.0408356			-0.152358			0.126521				0.0408993			0.000213343			0.0461064
0.0340584			0.172517			0.0566972				0.0525649			0.0280011			0.0745649				0.0118125			0.0625666			0.119369
0.0180593			0.0158188			0.0608098				0.049824			0.0715105			0.0829561				0.0594008			0.0640312			0.086059
0.0279085			0.211626			0.0365927				0.0407221			-0.132296			0.108922				0.0432176			0.0892401			0.155955
0.0364311			-0.194146			0.107024				0.0488666			-0.082983			0.11887				0.0278843			0.00967231			-0.0661672
0.0109757			-0.0964384			0.0039852				0.0366886			-0.0649377			0.0744278				0.0308313			0.110349			0.131449
0.0252609			0.0446169			-0.0368697				0.056939			-1.75778e-05			0.0978157				-0.0128326			0.0318602			0.0828511
0.0129766			0.118715			0.0245066				0.0636924			0.0721576			0.103918				0.067834			-0.0588837			0.152436
0.0349702			0.0197212			0.0493917				0.0155837			0.104862			0.108101				-0.00490583			0.0761553			0.0833062
0.0558603			-0.0071811			-0.0348733				0.0579015			-0.0832542			0.102253				0.021691			0.0672395			0.150578
-0.00574557			0.00823062			0.0545396				0.0337005			-0.0344305			0.0788086				0.0103931			0.0133221			0.128112
-0.0199336			0.052815			0.14116				0.0261526			-0.0133966			0.126203				-0.00654731			0.100116			0.0944462
0.0653218			-0.259075			0.0598245				0.0501679			-0.0321705			0.109792				0.0474172			-0.056505			0.0258307
0.00951656			0.0330415			0.0582305				0.0160903			0.00620738			0.122728				0.0303811			0.0716846			0.0370358
-0.0120225			0.0249825			0.0492012				0.0685244			-0.0310545			0.0801323				0.00149381			0.119278			0.0421685
0.0461582			-0.0886805			0.0598138				0.0286984			0.014355			0.0882702				0.00881206			-0.0212067			0.0871086
0.0677632			0.0599627			0.0424594				0.0415744			-0.0572945			0.09293				0.00910509			0.0122069			0.224814
0.0491832			0.0559161			-0.00321398				0.0467034			-0.0368009			0.124314				0.0340539			0.0771241			0.129603
0.0636824			0.0991567			0.164579				0.0432204			-0.00970697			0.0992429				0.0263492			0.149828			0.0969482
0.0555423			-0.048148			0.117949				0.0608094			0.0754457			0.100282				0.0121165			-0.00554899			0.0926193
0.0658615			0.181756			0.050786				0.0275173			-0.00950345			0.0796947				0.0872376			0.0442749			-0.0384312
0.065852			-0.0460816			0.0752566				0.0179162			-0.0192711			0.121936				0.0358168			0.212645			-0.120682
0.0493471			-0.00645338			0.120238				0.0193531			0.0378613			0.121658				0.0384747			-0.0339142			-0.00736438
0.0520357			0.0921088			0.0245598				0.0274422			0.00189827			0.143862				0.0378921			0.0403213			0.148046
0.0547021			0.00832641			0.0303854				0.0334106			-0.00547427			0.0997506				0.0051027			0.00768458			0.0252351
0.0527			0.0121889			0.172335				0.0314525			0.0548564			0.131091				0.0177083			0.00565125			0.0447627
0.0686314			-0.0693907			0.00233673				0.0301574			-0.00148179			0.11835				0.00307568			0.00983018			0.0703156
0.0665967			0.0310648			0.0225611				0.0494537			-0.0232489			0.106527				0.00824624			0.0790253			0.159137
0.0561181			0.114138			0.0482275				0.0506936			0.021073			0.121983				0.015244			0.057435			-0.0162845
0.071473			-0.00212009			0.0675405				0.0297844			0.00199134			0.125488				0.0463875			-0.0182526			-0.0104927
0.0486391			0.0581438			0.0853814				0.0636135			-0.102447			0.11474				0.0570906			-0.0194063			0.00790492
0.0588543			0.0665916			0.117697				0.046001			0.026656			0.131875				-0.00388277			0.0997928			0.0812324
0.0563119			0.0494952			0.0722539				0.0388965			-0.00351264			0.159115				0.0668423			0.0460644			0.0773048
0.0551958			0.0971424			0.0765241				0.0486426			-0.0089885			0.139202				0.0449605			0.0189881			0.0364639
0.057843			0.00683313			0.164935				0.0367711			0.00175666			0.10064				0.0555286			0.0576283			-0.027219
0.0367649			0.0275229			0.0158806				0.0214582			-0.0106086			0.135377				0.0264991			-0.00728855			0.0381838
0.0453638			-0.0482542			-0.0102022				0.047157			0.0251113			0.123329				0.0537932			0.0715614			0.024724
0.024101			0.0662934			0.0857365				0.0474149			0.0219882			0.114919				0.0648588			0.0324108			0.0131844
0.0418734			0.00570586			0.0224992				0.02825			0.0355507			0.138915				0.0520443			-0.0473302			0.0281189
0.0595025			0.00284906			0.0614852				0.0339487			-0.00518426			0.129304				0.0126785			0.0538883			0.0812123
0.0361694			0.0467726			0.0245174				0.0501868			0.0227736			0.145588				0.0265794			0.081117			-0.0134205
0.0273231			0.0332042			0.0441908				0.0417594			-0.0369845			0.157558				0.0364262			-0.032012			0.0632237
0.0524007			0.120917			0.060957				0.0248626			0.0152609			0.136745				0.0654413			0.0410915			0.0858236
0.0446554			0.080034			0.0671456				0.0238756			0.0572938			0.123496				0.0350816			0.0510469			0.295316
0.0135379			-0.0305641			0.0267762				0.0181704			0.0826303			0.135742				0.0378211			-0.0204319			-0.154224
0.0486869			0.0189996			0.0478468				0.0563315			-0.0227649			0.137219				0.0485574			0.00511855			-0.0608491
0.0546231			0.0027706			0.0662354				0.021996			0.0840238			0.118751				0.0674147			-0.0641676			0.103752
0.0564617			0.0904694			0.0910538				0.0549836			0.0774621			0.100644				0.0509625			-0.029399			0.168886
0.065795			0.0270505			0.0632024				0.0530392			-0.094368			0.0934749				0.0466092			-0.0179922			0.119416
0.0614911			0.11997			0.0618601				0.0404478			-0.0718078			0.12846				0.0423694			0.0312343			0.048141
0.0528712			0.12993			0.0728005				0.0530254			-0.205043			0.0957085				0.0402628			-0.0955378			0.0313072
0.0556319			0.11014			0.0397466				0.0300571			-0.0198896			0.132625				0.040591			-0.0433478			0.156129
0.0304493			0.0256296			0.0490755				0.0207286			-0.0469482			0.113131				0.0326688			-0.0937336			0.0122335
0.0761852			0.111731			0.0469605				0.0707963			0.0420563			0.109458				0.0654031			0.0409976			0.00628502
0.0535174			0.0617714			0.0599312				0.00674896			-0.0520155			0.131786				0.025547			0.0801004			0.176658
0.0550623			0.0469847			0.0972341				0.034271			0.0300312			0.075917				0.0362391			-0.0125899			-0.0015594
0.0555246			0.0882088			0.0764802				0.0410023			0.0592115			0.108504				-0.00639705			0.0406461			0.191048
0.0428412			-0.0113796			0.130722				0.047502			0.0993495			0.0851271				-0.0430175			0.0183778			-0.105656
0.0567645			-0.0105833			0.12399				0.0310959			-0.168691			0.0957639				0.0172212			-0.00226845			0.089865
0.0676839			-0.034988			0.107685				0.0521281			0.0192785			0.102556				0.0419738			-0.00178141			0.00139556
0.0623429			0.0152758			-0.0196806				0.0413142			0.173286			0.11431				0.0606569			-0.0415132			0.0754264
0.0697098			0.0466257			-0.00435542				0.0464798			0.0998614			0.0871348				0.0851097			-0.0202796			0.0276865
0.0576092			0.0268917			0.0340892				0.0480684			-0.162249			0.119259				0.0510681			0.0317085			0.0317689
0.0487852			0.0359002			0.0717942				0.0389617			-0.0646137			0.107325				0.0292765			-0.0234992			0.0740166
0.0653378			0.0107309			0.0902367				0.0180394			0.00202244			0.10916				0.0742231			-0.0144773			0.138117
0.0604935			0.0567627			0.0606747				0.0344682			-0.0542708			0.136384				0.0442812			0.0296983			0.063264
0.0620112			0.0114563			0.0417953				-0.0172007			-0.00963568			0.124175				0.0313963			0.0116686			0.187254
0.0531847			0.0335859			0.0528113				0.0453607			0.0402934			0.0894978				0.0817368			0.0217612			0.0478488
0.0516883			0.0500241			0.0728773				0.0322797			0.169009			0.112722				0.0134511			0.00414328			0.124035
0.0831595			0.0294858			0.0633877				0.0775785			0.00988124			0.100667				-0.00105713			0.0213511			0.154131
0.0535312			0.102099			0.036264				0.0543253			-0.0690259			0.0966862				0.0685665			-0.0441164			0.167862
0.0710222			0.0229858			0.00883333				0.056889			-0.0910073			0.0895451				0.0478683			-0.00726486			0.355247
0.0466654			-0.011948			0.0105372				0.031817			-0.01176			0.116386				-0.0391822			0.0295545			0.121127
0.0402097			0.0214041			0.103716				0.0500532			-0.0026504			0.109763				0.0549325			-0.0183653			-0.0855505
0.0527876			-0.0230403			0.0898039				0.0545448			0.121996			0.117038				0.0348627			-0.00717403			0.114329
0.0403473			-0.0269352			0.0754715				0.0918218			-0.0411261			0.0987258				0.104438			0.0324783			0.0373178
0.0573273			0.013038			0.0406426				0.0443566			-0.139793			0.0852466				-0.075301			-0.0101467			0.0662212
0.0350786			0.0319123			0.0130957				0.0455445			-0.0492003			0.104654				-0.0209463			0.0074768			0.326362
0.0695388			0.00847763			0.0319072				0.0636435			-0.0889313			0.111738				0.0374479			-0.00596762			0.106438
0.0614603			0.0974443			-0.00683227				0.0305623			-0.00504068			0.108268				-0.0194568			0.0339222			0.233548
0.0716131			-0.0861121			0.092639				0.0395776			0.00943009			0.140756				8.92701e-05			-0.00245747			0.142523
0.055843			0.0810524			0.0349105				0.0227157			-0.0117015			0.131384				0.0219097			-0.0396153			0.0413326
0.0592106			0.0344221			0.0944007				0.0335907			0.0677554			0.107697				0.0414478			0.00641989			0.108079
0.0353689			0.0135374			0.0464524				0.0366451			0.135615			0.105974				-0.0264095			0.0250116			0.123942
0.0656025			0.0508547			0.0672232				0.0608022			0.0436698			0.119136				-0.0492515			-0.00156345			0.20785
0.0528296			-0.0169759			0.0386076				0.0456056			-0.0386699			0.122206				-0.110933			0.0350928			-0.0403604
0.0457424			0.0426631			0.018012				0.0500082			0.00518813			0.11179				0.0258995			0.00219144			0.0296591
0.107675			-0.038493			0.00682507				0.0240678			-0.00945743			0.154912				0.0526767			-0.0300709			0.0340537
0.0526775			-0.0915113			0.0548841				0.0367379			-0.0222526			0.0976912				-0.00245858			0.059103			0.108386
0.0465936			0.0481339			0.0592964				0.0533419			-0.0404905			0.134723				0.0484639			-0.00734454			0.203625
0.0323431			-0.0269036			0.0141829				0.0202891			0.0463683			0.131838				-0.00837191			-0.024814			0.103713
0.045492			-0.0229425			0.0279462				0.0564597			0.0705407			0.105403				0.0724174			-0.0323755			-0.0640381
0.0517941			-0.021802			0.0748958				0.0171245			0.118605			0.0957128				0.0230213			-0.0390944			0.156336
0.0473455			0.0229297			0.0755337				0.127989			-0.0671141			0.100602				-0.0037693			-0.0352816			0.115774
0.0524365			0.0331561			0.0966388				0.126513			-0.273425			0.106758				0.0464122			0.0239001			0.102269
0.0493852			0.0273311			0.0660272				0.193611			-0.160051			0.127805				0.0635809			0.0577033			-0.0657142
0.0420665			0.0172469			0.0620576				0.166484			0.13629			0.15149				0.135133			-0.00334001			0.0161435
0.0611009			-0.00127277			0.0905854				0.131329			0.142678			0.127486				0.0260664			-0.00519204			0.150898
0.0629161			0.0207238			0.0528442				0.161227			-0.0210358			0.103711				-0.0505057			-0.0603076			0.0162192
0.0698097			0.0484506			0.0582126				0.221405			0.124822			0.0806546				0.0602292			0.0106332			-0.00560651
0.0455254			0.0287237			0.0387721				0.0789651			-0.0426281			0.118188				-0.0212776			-0.026882			-0.0298389
0.0514827			0.0168358			0.0251328				0.115972			0.204751			0.105365				0.00439855			-0.167226			0.0323769
0.0503175			0.0284479			0.0617906				0.0178678			-0.0836954			0.128915				0.0891081			0.0360184			-0.012409
0.0494211			-0.0096051			0.041695				0.0911144			0.155497			0.0847167				0.0852813			0.0286216			-0.0327531
0.0723018			0.0241403			0.0687927				0.00853616			-0.0967828			0.194006				-0.0224161			-0.0317892			0.136817
0.053962			-0.022038			0.0605127				0.0995398			-0.0361014			0.104755				0.0965793			-0.0569853			0.0901585
0.0397801			-0.0196909			0.0268752				-0.0688281			-0.143352			0.455855				0.0518057			0.0396477			0.330796
0.0547277			-0.00427978			0.104295				-0.0512099			0.00950147			0.532166				-0.0411062			0.0723333			-0.173326
0.0349338			0.0128411			0.0985788				0.0382864			-0.0572997			0.421734				0.011268			0.0247596			0.0702956
0.0505352			-0.00545793			0.112289				0.00865531			0.0434147			0.483287				0.0776012			0.0661739			0.135201
0.047485			-0.012529			0.134032				0.0256411			0.17221			0.318474				0.0434848			-0.00610306			-0.155697
0.0577266			0.0210875			0.049161				-0.018875			-0.0619614			0.405802				-0.148349			-0.0662802			0.149984
0.047834			0.0472618			0.0649882				0.03256			-0.173531			0.159145				-0.00881437			-0.0560856			0.234902
0.0580868			-0.0271652			0.0584348				0.0222466			0.0343742			0.281267				-0.0390529			0.19084			0.114224
0.0668657			0.0158109			0.0969468				-0.00735099			0.0452084			0.438897				0.0401093			0.0236806			0.144785
0.0426423			0.063556			0.000522554				-0.017606			-0.0228615			0.40325				-0.00217519			-0.0536503			0.159807
0.0721085			-0.0282079			-0.00480002				-0.00170939			-0.0248137			0.17348				0.0587344			-0.0411197			0.153671
0.0616734			-0.0404986			0.0181973				-0.00390442			-0.0038712			0.327356				-0.00651737			0.0364026			0.0180237
0.0437614			-0.0102073			0.0410146				-0.01635			0.0280792			0.0433374				0.0197405			-0.0444516			0.0633468
0.0611434			-0.00367813			0.117398				-0.00921547			-0.0256911			0.287791				-0.0551522			-0.0334302			0.014799
0.0663917			0.0255598			0.0304105				0.00664555			-0.00279577			0.329606				0.0552754			0.0933779			-0.176785
0.0501345			0.0303466			0.100319				0.0299386			0.0210058			0.0810518				-0.0117881			0.0144756			-0.0438014
0.0343105			0.0273854			0.097403				-0.00875919			-0.000671458			0.547812				0.0215881			0.216762			0.0675458
0.0469983			-0.0181269			0.0917689				-0.0151675			-0.0636371			-0.0350132				-0.035086			-0.0426481			0.168308
0.0211641			0.0170286			0.0576803				-0.00691819			-0.0119705			0.0551742				0.019794			0.0598305			0.0253684
0.0264226			0.044514			0.0519059				-0.0219788			-0.0146971			0.0540235				0.03155			0.0242191			0.0253399
0.0293156			-0.0365702			0.0483786				-0.0126			-0.047802			-0.170892				-0.0710175			0.0826762			0.00391706
0.0256574			0.0432285			0.0631437				-0.0247869			-0.105138			-0.119484				0.00837381			0.0386795			0.0772391
-0.000764665			0.0108494			0.099763				-0.0231528			0.0397708			0.00536682				0.0656412			0.0461567			0.0635059
0.0263449			-0.0120598			0.0332002				0.00324048			0.0259363			0.254633				-0.000158035			0.0740814			0.113832
0.0307467			0.00487886			0.0482549				-0.00584063			0.0718866			0.0727091				0.0357534			0.0581256			0.033453
0.0139086			0.00971776			0.0427029				0.0393795			0.140401			-0.0311153				-0.0149488			-0.0274733			0.0869032
0.0390173			0.0231601			0.0699094				-0.00679616			-0.0492219			-0.0389079				0.0661308			0.0511764			-0.0360035
0.0381204			0.0230363			0.0922537				0.0163183			0.088778			-0.0293647				0.0468342			0.04375			0.024695
0.0483798			0.00491573			-0.0300704				-0.00894787			-0.179376			0.0815326				0.0669021			0.107478			0.0890591
0.0539869			0.0562502			-0.0123439				-0.0574031			0.0713816			-0.0997527				0.0582902			0.0585185			0.14013
0.0292031			0.0274379			-0.0658052				-0.0266549			0.0232557			0.258623				0.0551214			0.0626321			0.119034
0.0640753			0.031671			0.0215998				0.0197712			0.0849999			0.130941				0.0859414			0.0928913			0.0525064
0.0396899			0.00235657			0.0776234				-0.0183336			0.0400743			0.161675				0.0117555			0.0175529			-0.0098432
0.0155091			-0.0347805			0.0626307				-0.0138898			0.107011			0.150388				-0.0358434			0.0241124			0.126376
0.0215941			0.0608743			-0.129287				0.0386293			-0.011972			0.0419861				0.0510259			0.0345973			0.170439
0.0193517			0.0743559			0.0912108				0.00189199			0.0836457			0.188986				0.121469			-0.0230971			0.0229225
0.0476052			-0.0171594			-0.00294111				-0.0464014			0.0970257			0.180825				0.0108988			-0.0133798			0.0847121
0.0324616			0.0292162			0.125409				-0.00875888			-0.187048			0.127036				0.00892753			0.0403922			-0.00374031
0.0187541			0.041221			0.00479426				-0.0288576			-0.198999			0.132504				-0.00287254			-0.00707929			0.167681
0.0424093			0.05945			0.0293621				-0.0233722			-0.184993			0.0409166				-0.0697063			0.0067667			-0.23054
0.0181692			0.0280764			-0.0329225				0.0416387			0.198583			-0.0757758				0.0119566			-0.0290471			0.140737
0.0409849			0.0495126			-0.00278695				-0.00509741			-0.0207963			-0.101342				0.0353106			0.0665089			0.125782
0.0190704			0.0183619			0.0365701				0.0110854			-0.111857			-0.00749724				0.00762897			0.0497879			-0.00140275
0.0338356			-0.0403457			-0.0912893				-0.0420835			-0.0291025			0.115346				-0.0661512			0.0106928			0.130571
0.0433668			0.000298928			0.117881				0.0161175			-0.123427			0.208389				0.0479233			0.0611412			0.160108
0.0146287			0.0536315			0.039303				0.0259763			0.0146473			0.233966				0.0482523			0.211593			-0.537328
0.0131763			-0.0139106			0.0179406				0.0038038			0.0850456			-0.15738				0.0019469			0.138035			-0.00654561
0.0224771			0.0904878			0.0278841				0.0212386			0.0188137			0.0423775				-0.0410679			0.046323			0.141848
0.0172811			0.0390942			0.0397742				0.00882905			0.0704192			0.541508				-0.0303545			0.0742421			0.0341655
0.0239381			0.00741472			0.0321585				-0.0241475			-0.0258933			0.370316				0.00323266			0.0109527			0.0341057
0.0391412			0.0914426			-0.000421979				0.00853183			-0.0523672			0.49231				0.0969085			0.114322			0.00812217
0.0363606			0.0462815			0.0149392				0.00364012			0.138948			0.0636002				-0.0810044			0.0804041			-0.161941
0.0450565			0.0795393			0.102798				0.00877942			-0.101394			0.327068				-0.00437944			0.0436381			-0.319049
0.0503547			0.0651585			0.00818406				0.014814			0.0834356			0.306393				-0.0601404			0.0144661			0.110562
0.018501			0.00892699			-0.0148594				0.00965511			0.165644			0.400887				0.0522516			0.0197453			0.142261
0.00137658			0.0662548			0.0403169				0.0472958			0.170675			0.281912				0.0206186			0.0299687			0.0834775
0.0329046			0.00792281			0.0475283				0.0209302			-0.00510976			0.510385				0.0618032			0.159969			0.201735
0.027312			0.0579966			0.0640739				-0.00876248			-0.12902			0.248741				0.182394			0.069942			0.00965292
0.0389274			-0.0180549			0.0168431				-0.0113417			-0.0227363			0.387604				0.171668			0.0156914			0.059357
0.0322116			-0.00530342			0.0442246				0.0542895			-0.240743			0.108368				0.0642959			0.0417605			0.102091
0.0307566			0.070958			0.0337685				0.00525556			-0.13866			0.273871				-0.0512563			0.0325224			-0.110492
0.0282814			0.0242801			0.0430838				0.00595379			0.0466383			0.24832				0.0292398			0.107706			0.171144
0.0458332			0.0787135			0.0773581				-0.00286977			0.183177			0.0531358				0.0824942			0.00530507			0.0130309
0.0511895			0.0706644			0.0647813				-0.0381727			0.000784724			0.569021				0.0898147			-0.0614858			0.0827992
0.0350926			0.0129968			0.0550634				0.0361061			0.133952			0.208258				0.0632202			0.0234402			0.20228
0.0211135			0.0465026			0.0551449				0.00345388			0.0891853			-0.0818211				-0.0165961			-0.0335532			0.135362
0.038783			0.039471			0.0686079				-0.00114144			-0.109114			-0.142336				0.0445158			0.0276513			0.107371
0.0357075			0.0410362			0.0699478				0.0117913			-0.245894			0.152502				0.0675544			0.0277312			0.164511
0.0437941			0.0626559			0.0457789				0.0274496			0.0575831			0.160359				0.00721694			-0.144092			0.149581
0.0165804			0.0308289			0.0655847				-0.0208354			-0.0829682			0.227955				0.0673258			-0.0599509			0.117335
0.0260248			0.0671903			0.0517643				-0.0524023			0.0158731			0.0479359				0.00213017			0.059338			0.156581
0.0150007			0.0352267			0.046816				-0.0503876			-0.0738949			0.164907				-0.00477882			0.104045			-0.0250791
0.04239			0.0448197			0.0535305				-0.0279639			0.00685954			-0.00914213				0.0740737			0.102027			0.147656
0.0450327			0.0935864			0.058299				0.0191204			-0.343826			0.200991				0.0438944			-0.0222293			0.0820182
0.0359855			0.0566654			0.055895				0.00568919			0.0404795			0.219309				0.0491201			0.0647725			0.143574
0.006139			-0.00481203			0.0714259				-0.00200559			0.0283404			0.161737				-0.00345457			-0.168611			0.0468067
0.0235177			0.0030343			0.0720063				0.0172261			0.197326			0.106316				0.0248644			0.0759489			0.0817036
0.00865587			0.0310694			0.0501031				0.0197666			-0.0519297			0.216619				0.0583319			-0.0976758			0.147717
0.0359779			-0.0126632			0.0742964				0.00871437			0.0305912			0.142723				-0.0157625			0.0453194			0.215123
0.0336368			0.0376202			0.0568135				0.0867384			0.00757966			0.126866				-0.000570079			-0.160849			0.259032
0.0473958			-0.00638907			0.0850398				0.0204964			0.00553844			0.111964				0.0356942			-0.0270107			0.0793186
0.0247076			0.0488306			0.0457532				0.0468309			0.194554			0.305907				0.163533			0.123004			0.0753155
0.0353123			-0.0177407			0.0455294				-0.00421095			-0.195115			0.197503				0.0809823			0.0731553			0.169648
0.0182697			0.0553211			0.0681609				0.00626394			-0.10788			0.0960446				0.0865007			0.0579525			0.00361161
0.0344711			0.0309993			0.0338004				0.0419086			0.121923			0.169916				0.0525795			0.0681184			0.0642928
0.0138409			0.0605334			0.0860278				-0.00324574			0.0566738			0.00874612				-0.0118524			-0.103983			0.175356
0.0357571			0.000871146			0.0217347				0.0620462			0.0257507			0.120634				-0.0109983			0.0285164			0.0499181
0.0307135			0.0430688			0.027767				0.0251611			0.0252916			0.0666455				0.0793138			0.064143			0.0988898
0.0335208			0.0461311			0.0430539				0.0201841			-0.0245903			0.103399				-0.0118286			0.123479			-0.013106
0.0194765			0.0143526			0.0424985				0.024328			0.0195747			0.123465				0.0936482			0.140243			-0.0140925
0.0375883			0.0527303			0.0491839				3.24762e-05			0.152291			0.141145				-0.0136627			0.198819			0.0200457
0.0151177			-0.0125935			0.0473241				0.0388487			0.0929243			0.102087				0.0652091			0.091876			0.133609
0.0368131			0.0631541			0.0350242				0.0497996			0.0864858			0.120396				0.0480765			-0.0497151			0.138934
0.0189347			0.0414901			0.0436119				0.0321963			0.11972			0.0889864				0.0478013			0.0212471			0.0385586
0.0319956			0.0387568			0.0210261				0.00384738			0.155595			0.139498				0.0422262			0.181542			0.0420973
0.0346687			-0.0293621			0.0563887				0.0259688			0.0177874			0.0290325				0.0110797			0.0529268			0.140045
0.0177143			0.0376435			0.0310017				-0.0306895			0.087327			0.121734				0.0709714			0.146626			0.243976
0.022954			-0.0241478			0.0338431				0.0122958			-0.000571134			0.104903				0.062289			-0.00220011			0.0946296
0.0331128			-0.0186374			0.0742759				0.0141996			0.0715217			0.0442403				-0.00693793			0.108839			0.104961
0.0349529			0.0156592			0.0416976				-0.0386382			-0.0619947			0.0810664				0.0298489			0.00867844			0.11627
0.0215298			-0.0367059			0.0593166				0.0328101			-0.119689			0.0109575				-0.0162193			-0.00134811			0.15973
0.0288594			0.0215392			0.0256014				0.0398498			0.255048			0.147652				0.00525617			0.0224293			0.127505
0.0337168			0.0506481			0.0433524				0.04256			0.00641493			0.0438628				0.0805332			0.102505			0.0195686
0.0476055			0.0104063			0.0482322				0.0363371			0.00942011			0.200041				0.0316592			0.0714729			0.176945
0.0159129			0.103149			0.0551617				-0.0168935			0.0594104			0.0301217				0.00420156			-0.0418122			0.160379
0.0175558			0.00492083			0.0405003				0.0499675			-0.108301			0.262859				-0.078461			0.0864835			0.0413811
0.0392912			0.000797636			0.0454711				0.117188			-0.0205567			0.104496				0.105443			-0.0196753			0.0545409
0.0350517			0.0323357			0.0584865				0.0362827			-0.118561			0.0745835				-0.0189844			-0.0816729			0.0951925
0.0143741			0.0102455			0.0475525				0.0105976			0.0616523			0.0883115				0.0371007			0.11606			0.11022
0.0877003			-0.0321689			0.046879				0.0134657			0.0405762			0.101874				0.0296274			0.0677146			-0.00819212
0.0577846			0.0336694			0.0533337				0.01274			0.054143			0.0939346				0.10061			0.125767			0.0847276
0.0539108			-0.0819734			0.0780019				0.0171389			0.0363315			0.110831				0.109289			0.0222091			0.0905736
0.0492805			-0.0108971			0.0439244				-0.00285383			-0.00246303			0.102697				0.0122069			0.0539624			-0.0299088
0.0330259			0.0108886			0.0506477				-0.0146577			0.221711			0.0230319				0.0570665			0.0609502			0.189473
0.0604982			0.141476			0.0442544				0.0254906			-0.0882241			0.129161				0.0852604			0.0881573			0.128423
0.0788537			0.258453			0.0490954				0.01098			-0.171357			0.0238323				0.13259			0.0152009			0.0919157
0.0214671			0.232143			0.0183334				0.0367201			0.170288			0.0735356				0.0443623			0.0601223			0.020746
0.0387104			0.0890098			0.0485527				0.0383791			0.0242358			0.038473				0.0721847			-0.058295			-0.0757834
0.0433761			0.22351			0.0410148				0.0765219			0.0660849			0.0783671				-5.63113e-05			0.101608			0.126527
0.114815			-0.0384209			0.018255				0.00987693			0.173924			-0.132919				-0.047939			0.00932598			0.117653
0.0846767			0.0645622			0.0373201				0.0481817			0.0446741			0.0198759				-0.0299601			0.0767856			-0.02468
0.0311862			-0.291756			0.0376933				0.0456907			-0.131632			0.0906543				0.042705			0.0449919			0.241049
0.0168131			-0.254206			0.0366878				0.00880482			0.0107793			0.115272				0.0761301			-0.234779			0.0390789
0.045271			-0.149948			0.0343739				0.0159499			0.0551042			0.0530508				0.0261205			0.0902042			-0.00201235
0.0440196			0.349675			0.0599301				-0.0221869			0.0970142			0.0101958				-0.0661401			0.0426471			0.149323
0.0753633			0.269309			0.0469685				-0.026229			0.13068			0.0959918				0.0377472			-0.0353423			0.202041
0.0551297			-0.0216894			0.0490935				-0.0141912			0.132289			0.0743595				0.00759984			-0.0414506			0.101903
-0.00690093			0.087163			0.049325				0.0511556			-0.00134978			0.0294195				0.0896171			0.167082			0.163047
-0.0176788			0.125062			0.0385486				0.101169			0.159207			0.00135245				0.0816578			0.0241259			0.22065
0.0686839			0.0362134			0.024959				0.0518177			-0.00672436			0.0956577				-0.0397213			0.14766			0.136805
0.078255			-0.0431151			0.0405362				0.0170576			-0.00863356			-0.0280837				0.0165987			0.0604797			0.153545
0.0367291			0.0888085			0.0180831				0.030623			-0.0558781			0.0316153				0.0585432			0.0290722			0.195244
0.0471345			0.0468024			0.119727				0.060492			-0.316616			-0.0577936				0.0933708			0.0166225			-0.0304525
0.0455834			0.0601767			0.143038				-0.00164759			-0.0648665			0.116042				0.0805093			0.0974206			0.197384
0.069612			0.0265162			0.0169151				0.0146214			0.0824594			0.182597				0.00847908			-0.143964			-0.0577392
0.0359759			-0.0819685			0.0587653				0.0153333			0.00881036			0.0656787				0.0283066			0.0503309			0.092326
0.0553651			0.0781299			-0.0607514				0.0250058			0.159907			0.0867096				0.0298438			0.201618			0.0827997
0.075108			-0.0704096			-0.0204197				0.0361269			0.0124939			0.0120182				0.0535093			0.0881987			0.105514
0.0276766			0.0285771			-0.0219368				0.0790184			-0.136961			0.113007				0.777467			0.0228496			0.0595974
0.0245094			0.0883261			0.0537921				0.101455			-0.05992			0.071371				-0.0506437			0.0914133			0.219454
0.0748201			0.000833488			0.00174557				0.0198555			-0.00117676			-0.016165				0.216114			-0.0574067			0.143424
0.111037			-0.0374767			-0.02504				0.0430557			0.0390013			0.0431206				-0.11275			0.0115717			0.121001
0.164757			-0.130539			0.00249195				0.0554896			-0.235487			0.128107				0.0293503			-0.0576824			0.243414
0.0740746			-0.129271			0.0747715				0.0318214			-0.11947			0.0168314				0.0561192			0.0569252			0.0801684
0.108335			0.0148759			-0.0168847				-0.0121658			-0.384298			-0.00314492				-0.110299			0.195048			0.110287
0.0683022			0.0477665			0.00709006				0.00134521			-0.129894			0.0965052				0.0284119			0.101022			0.155904
0.0524343			0.186005			0.200746				0.0363696			0.326809			-0.029522				0.0332659			0.00210852			0.166253
0.0795185			-0.00720648			0.185327				-0.00296661			-0.0629187			0.0662324				0.139699			0.021716			0.293814
0.0328488			0.166089			0.0674595				0.0499969			-0.0240823			0.00229872				0.0270014			-0.015179			0.179046
0.0906222			0.0593218			-0.0201852				-0.0767462			-0.077083			0.0683401				-0.0263595			0.0380265			0.150099
0.000869104			-0.0126395			0.0491465				0.0492894			0.128937			0.0127014				-0.00587294			0.0256065			0.159568
0.0523129			-0.0410462			0.113505				0.127324			0.18704			-0.0267541				0.0332614			-0.000704961			0.202627
0.0394295			0.0838682			0.0661438				0.074611			-0.174247			0.0972309				-0.00118803			0.0281816			0.274561
0.0468229			0.137725			0.0983934				0.0744862			0.0511916			0.0897098				-0.0193509			0.0622361			-0.0613903
0.0340351			0.00772028			-0.121253				0.0583531			-0.135743			0.0743505				0.0220892			0.0889857			0.203519
0.0039026			-0.0450449			0.0140592				0.118678			0.129754			0.0461809				-0.0180735			-0.0381001			0.138713
0.0380439			0.130732			-0.0144831				0.135382			-0.117227			0.147429				0.0337145			-0.00978374			0.133996
0.0629032			0.0563056			0.0409916				0.0990116			0.072362			0.0782933				-0.00705914			-0.0353564			0.0848222
0.0393369			0.133111			0.0660327				0.0614497			-0.0154376			0.0682727				0.0139166			0.0433274			0.183668
0.0590302			-0.0089219			0.0494789				0.119484			-0.110326			0.110776				-0.0494768			0.124403			0.0581154
0.0510356			-0.0198049			0.0540571				0.175145			0.104836			0.0455891				0.0114752			0.105562			0.077598
0.0752376			-0.061324			0.0040485				0.0783584			0.02159			-0.0503129				-0.0322956			0.012328			0.143273
-0.0388318			-0.111034			0.0412189				-0.0376136			0.0922157			0.0403233				0.00868394			0.0985755			0.16764
0.0688476			0.125662			0.19443				-0.00877474			0.0217784			0.0675535				0.0443686			0.0849619			0.22556
0.00406694			0.141594			0.259207				0.0162009			0.084306			-0.0100762				-0.0495038			-0.00101646			0.154177
0.0661845			0.00724457			0.458842				0.0721827			-0.0120045			0.0731836				0.0134252			0.0539434			0.0556572
0.0347951			0.0531908			0.0587339				-0.0272727			0.183726			-0.0322875				-0.0531586			0.0850355			-0.0754697
0.0237493			-0.11957			0.192538				0.0793896			-0.0977521			0.0822839				-0.0584326			0.0259168			0.134114
0.0917817			0.018025			0.08342				0.0287258			0.138849			0.0602444				-0.00128866			-0.0233429			0.106268
0.0401354			0.0316006			0.0630176				0.0124264			-0.0129559			-0.00609155				-0.0460232			0.00714396			0.223651
0.0633604			0.0836625			0.00412156				0.00101197			0.137171			0.130462				0.0228779			0.150952			0.172733
0.0352885			0.0268198			-0.0680831				0.0465453			-0.066782			0.0688956				0.0138972			-0.0563552			0.139139
0.0133006			0.0945201			0.0164797				0.00343124			0.0784682			-0.0111575				0.0475566			0.1649			0.0701081
0.012681			0.164984			0.101132				0.063018			-0.150997			0.058419				0.03753			-0.0236006			0.0679419
0.0476002			0.0208866			-0.0118801				0.0520297			-0.0810325			-0.0350415				-0.0412426			0.124475			0.0527069
0.0633273			0.0512903			0.0048609				0.053687			-0.00433218			0.124609				-0.0298589			-0.0524621			0.198407
0.0608611			0.0672834			0.00942206				-0.0233124			-0.110484			0.0817192				-0.00545922			0.00954049			0.108406
0.0425663			0.0541435			0.0417079				-0.0156514			-0.189899			0.118373				-0.0564231			0.0516976			0.106282
0.0168223			0.0320685			-0.148586				0.0746234			0.0392134			0.0578708				0.0726252			0.0755345			0.143404
0.0230392			0.00518031			-0.0353236				0.0467331			0.042197			0.0925058				-0.187372			-0.0410707			0.108003
0.0904844			0.0450302			0.0115954				0.0392795			0.0642221			0.0485842				-0.0543138			-0.0126128			0.117452
0.037722			0.0703871			0.0707604				0.0883628			0.0311381			0.0470753				-0.00725912			-0.132049			0.163412
0.0677908			0.0252546			0.077744				-0.0198256			0.0181755			0.0466162				0.0614658			-0.00772448			0.103506
0.06825			0.0503039			0.0231836				0.0726545			-0.0161573			0.0930754				-0.0555893			0.0322282			0.126657
0.0714175			0.104637			-0.0343555				-0.038586			-0.0745159			0.0489059				0.0769708			0.03309			-0.00941881
0.050334			0.0625164			0.0335048				0.0666263			-0.00878344			-0.00157667				-0.0130617			-0.0513326			0.0198614
0.0120284			0.0553345			0.0808094				0.0243257			-0.107651			0.0312609				0.0286311			0.0214323			0.0511368
0.0681979			0.0284637			0.0368523				0.0881766			-0.0553674			0.07459				0.0386509			0.0809869			0.0401674
0.0258568			0.0308942			0.129415				0.0175198			-0.135452			0.124067				0.0284991			0.254564			0.165387
0.080731			0.0429154			-0.0775384				0.122531			0.00702604			0.069643				0.1165			0.0453798			0.0796192
-0.00283841			0.0774894			-0.111343				-0.0311512			-0.216882			-0.106722				0.216812			-0.0383792			0.20489
0.0146612			-0.0342937			-0.0190477				0.0580129			-0.10963			0.0439241				0.0900095			0.0309458			0.172378
0.0156263			0.0457736			0.0283984				0.043199			-0.0549281			0.182528				0.0406162			0.0227217			0.106714
0.0726767			0.121935			-0.0481603				0.0687362			-0.017177			0.0835383				-0.0528539			-0.0153101			0.130343
0.0126824			0.0049914			-0.112227				-0.00670641			0.0544734			-0.0468323				0.0441564			0.0353553			0.0378401
0.101536			0.0724862			-0.0190976				0.174152			0.115916			0.00720215				0.0875503			-0.163292			0.196216
0.115233			0.0271596			0.0923254				0.0837262			0.110318			0.106611				0.089182			0.0470958			0.169247
0.0622317			0.12421			0.0377838				0.0651862			0.0938664			0.286678				0.115891			0.0569692			0.134882
0.0757726			0.0775755			0.0207847				0.0317932			-0.125792			0.211587				-0.0979031			0.0326758			0.0960254
0.0666225			0.0721871			0.0351565				0.0514289			0.138969			0.151046				0.131466			-0.0633595			0.14065
0.0256103			0.110156			0.0718464				0.019777			0.0671584			0.107502				-0.0200916			0.0924314			0.103521
0.0378074			-0.0179328			0.065262				-0.222589			0.00564144			-0.0642788				0.0300505			0.076653			0.147902
0.0130987			0.0468008			0.0413979				-0.00709803			-0.0118387			0.0414227				0.114435			0.0293255			0.137072
0.0124413			0.0265256			0.0316841				0.122942			0.233565			0.148598				-0.0122954			0.114556			0.208244
0.0145686			0.057311			0.0900523				0.0624969			-0.124081			0.0126667				-0.0472883			0.0296439			0.00388766
0.0316219			0.133257			-0.00291886				0.0344398			0.105829			0.0692157				0.0310001			0.104462			0.00425601
0.0212604			0.131275			0.075351				0.0570878			0.129292			0.0577975				0.0688008			-0.0276991			0.113822
0.0159529			0.029735			0.0159316				0.0861961			0.117863			-0.0384507				0.103754			0.0765565			0.204034
0.0141884			0.0742403			0.0138244				0.0663275			0.0982796			0.0654483				0.014658			0.0836996			0.131466
0.0242348			0.089449			0.0471799				0.00572594			0.0356799			0.0266947				0.10027			0.033355			0.0175283
0.0420942			0.0787077			0.0555825				0.0569631			-0.0174827			-0.0357144				0.020368			0.00552976			0.08135
0.00104545			0.038885			0.186789				0.0184532			-0.0454445			-0.0886803				0.0130923			-0.0743344			0.089506
0.0518527			0.117628			-0.102242				0.0494621			0.133297			-0.0332248				0.00577616			0.0434369			0.157264
0.0575286			0.0451804			0.103935				0.0669755			-0.0784667			0.0898192				0.0323075			0.0792939			0.122414
0.0551055			0.0292336			0.125517				0.0205777			0.127715			0.0148216				0.131642			-0.0591148			0.151367
0.22663			0.0228465			0.0319333				0.101821			-0.0390392			0.0459547				-0.0376463			0.00277803			0.0562131
0.0953368			0.000911059			0.342039				-0.00276123			-0.0229905			0.0194815				0.0157251			-0.0845805			0.169798
0.0629795			-0.00922711			0.148757				-0.0143898			0.0256052			-0.0168023				0.0984545			-0.000362927			0.130245
-0.128077			-0.0587101			0.0536606				0.0533823			0.0174243			0.0751145				0.00632711			-0.00581177			0.0965993
0.083935			0.0129232			0.065496				0.00600467			0.0975378			0.101469				0.0224828			0.163272			0.0647358
0.186401			0.00981474			0.181675				0.0108924			0.0219246			0.123198				0.0466883			0.0704294			-0.0376348
0.170574			-0.0135199			-0.0187893				0.0333859			0.0657606			-0.0423218				0.0395192			0.0341636			0.127082
0.115519			0.0600678			0.0137918				0.0586764			0.128866			0.0216401				0.14444			0.117909			0.0171173
-0.0466008			0.0422072			0.09084				-0.119284			0.0799565			0.315122				0.132249			0.0477648			0.0584224
0.0663937			-0.00362137			0.0388832				-0.0435007			0.0547574			0.18035				-0.0640751			0.0514379			0.101807
0.145614			-0.0218824			0.127116				-0.0472745			-0.01587			0.123832				0.0476709			0.0733811			0.0731518
0.0135792			0.0285578			0.0318135				0.0467526			0.494987			0.321424				-0.0301842			0.103467			0.0765453
0.21625			-0.066926			0.0605036				0.00366465			0.0681626			0.419903				-0.0176185			-0.0463438			0.0981284
0.0681687			0.0823413			0.0480193				0.0609196			0.0646292			0.322012				0.186092			0.110615			0.153568
0.0508331			-0.0409454			0.131538				0.0909145			0.0606593			0.274659				0.08187			0.11136			0.135926
0.100949			0.0242929			0.0875926				0.0808252			0.0428822			0.0973995				0.0815381			0.0139567			0.106197
0.0655778			0.00260126			0.0475735				0.0547568			0.0772845			0.053273				0.0546909			0.160343			0.151894
0.01881			-0.0614706			0.120285				-0.100496			0.0241935			0.0291181				-0.0301393			0.0870669			0.00699635
0.102842			0.0343855			0.0283337				0.121556			0.0500132			0.105953				-0.124936			0.0628595			0.132814
0.0518071			0.082913			0.0765589				0.0174417			0.0396667			0.0465385				0.191783			0.0666549			0.0824456
0.101113			0.0603772			0.00779589				0.0491101			0.0159886			0.0552242				-0.00700786			0.0818621			0.154135
0.125412			0.0105092			0.0678376				0.00600389			0.012705			0.064882				0.0179721			0.108149			0.113092
0.116388			-0.0551456			0.0453744				0.0998848			0.0451772			0.104286				0.0278548			0.148829			0.13832
0.122123			-0.0339098			0.0610321				0.0690584			0.0188488			0.0772559				-0.0480631			0.0630481			0.183849
0.0750381			0.0752741			0.0650055				0.0878098			0.0574534			0.232974				0.015879			0.120104			0.132474
-0.156209			0.0385057			0.0332992				-0.0829368			0.00184727			0.0959713				0.10333			0.0965796			0.0483969
0.0435461			0.0727408			0.0364281				-0.0116959			0.0417894			0.193406				0.0302612			-0.0620156			0.121845
0.0936781			-0.020194			0.0884523				0.0379103			0.0385107			0.185482				-0.185604			0.169619			0.0669517
0.104106			-0.0883522			0.0815828				0.00312299			0.0448418			-0.122287				-0.0278767			0.0701376			0.146748
0.142701			0.021799			0.0101958				-0.010411			0.0232339			-0.0216728				0.0303678			0.0242258			0.140787
0.0558027			-0.0860993			0.0572909				0.00222604			0.0395233			0.147813				0.0513944			0.0800426			0.127326
0.108179			0.0605848			0.0242832				-0.0318541			0.00146947			0.10042				0.0886141			0.141038			0.0655863
0.113015			-0.00764171			0.156194				0.118457			0.0284598			-0.0207742				0.109353			0.025435			0.108027
0.074916			-0.000536766			0.000508783				0.0459567			0.0447474			0.0696641				-0.0108326			-0.0261403			-0.0379736
0.00464744			-0.0189174			0.128032				0.0674324			-0.0220574			0.0652752				0.0655344			-0.0589934			0.0650235
-0.0746255			0.0172921			0.0734594				0.00255556			0.0572424			0.0714155				0.0754871			0.0513609			0.146386
0.217784			0.000740612			0.0948248				0.143975			0.0310101			0.463835				0.0640685			0.130337			0.181524
0.0829014			0.0568066			0.0635727				0.11576			-0.00582981			0.295303				0.158538			0.052533			0.0701024
0.201854			0.0135167			0.146561				-0.0917538			0.0464908			0.435807				-0.0208805			0.0925443			0.11973
0.121102			0.0041322			0.0477245				-0.0917817			0.0228552			0.396618				0.176615			0.167029			0.0126403
0.127062			-0.0407843			0.0635159				0.0538669			-0.0247964			0.162279				0.00221725			-0.0885444			0.18743
-0.0254804			-0.024664			0.0478782				-0.0562294			-0.0131302			0.261597				0.258161			0.0175297			0.07446
0.104129			0.129635			0.0603106				0.0526786			0.0396058			0.191954				0.0767986			0.0129343			0.114677
-0.0144833			-0.0240333			0.0989263				0.0462911			0.00910722			0.37158				0.233239			-0.0462916			0.0844355
0.0524395			-0.019027			0.0294697				-0.300623			0.00793191			0.262251				0.268795			0.0449893			0.128696
0.156106			0.194897			0.124698				0.0342233			0.0478021			0.465217				0.0431488			0.0386514			0.110367
-0.0339095			-0.0151839			0.190828				0.0256253			-0.0331877			0.382547				-0.0690069			0.0667082			0.0680717
0.099715			0.0302862			0.0252056				0.00292244			0.0436462			0.330434				0.0483511			0.0766727			0.129737
0.0573807			0.0285288			0.156327				0.107902			-0.00181173			0.157227				0.0842598			0.0628404			0.0660506
0.0306874			-0.0531733			0.126331				0.102467			-0.0384916			0.48396				-0.118699			-0.123176			0.185635
0.0553972			-0.0831148			0.0201972				-0.0793865			0.0487876			0.192295				0.0878245			-0.0454775			0.182081
0.0457458			0.0351337			0.0652335				0.0550749			0.0170368			0.431593				0.213404			0.0387946			0.0840392
0.0190959			0.0286261			0.127685				-0.109786			0.0190944			0.416363				0.0191179			0.0929657			0.179539
-0.0454398			0.0687867			0.104259				-0.0520506			0.0114067			0.342161				0.0834764			-0.100691			0.085715
0.160019			0.0675772			0.0605376				0.0580119			-0.0473384			0.368439				0.0615591			0.00254268			0.103151
0.176181			-0.102967			-0.00958378				0.15968			0.031041			0.42971				0.0601395			-0.0584739			0.14382
0.0323743			0.0164208			0.0181573				-0.0246776			0.0320855			0.404599				0.226043			-0.20069			0.0688114
0.0580227			0.0232678			0.0774584				-0.0480954			-0.0217302			0.272743				0.0117967			0.0320623			0.147178
0.0606239			0.0508116			0.108219				-0.107039			0.0312625			0.376012				0.015723			-0.094759			0.0714545
0.0512226			0.0605957			0.0909816				0.085238			0.0482901			0.269564				0.110267			-0.0260136			0.00341877
0.0202543			-0.00133887			0.0300577				0.072899			0.0130991			0.212847				-0.0273121			-0.0491683			0.0194898
0.0230278			0.0127773			0.0783997				0.027278			-0.0165358			0.165675				0.0357211			-0.0379443			0.121031
-0.0235409			0.0723056			0.0698317				0.0696693			0.00960595			0.0971959				-0.039265			0.0907594			0.126231
0.0723205			0.0120797			0.1005				0.111722			0.0878588			0.107419				-0.0334671			-0.085964			0.0756914
0.179098			0.00591697			0.0763955				0.0747171			0.0189722			0.0819781				0.0507986			0.0378003			0.0803433
0.107963			0.0646939			0.151147				0.0217157			0.0168448			0.0519727				0.0293533			-0.307973			0.131659
0.109479			0.0344705			0.121585				0.0720403			0.0149162			0.0974128				-0.00671897			0.100639			0.0473619
0.0349971			0.0668603			0.079202				0.0732139			0.0140993			0.11768				-0.0196803			-0.0475922			0.0490898
-0.0396327			0.0367093			0.0953986				0.00753771			0.0133104			0.081251				0.0452428			0.0555487			0.100671
0.142774			-0.025845			0.184279				-0.166152			0.029215			0.0935332				0.0418147			-0.121022			0.102719
0.0607456			-0.117206			0.0502284				0.174123			0.0404637			0.0831903				-0.0198531			0.00432094			0.140067
0.00941447			-0.0245442			0.08585				0.109649			-0.0247257			0.0573543				0.238036			0.0328722			0.149274
0.0265371			-0.00286029			0.038443				-0.0501241			0.0124041			0.101539				0.0820698			-0.00230961			0.151277
0.0607455			0.0992393			0.0606424				0.0360231			0.0786192			0.0821018				0.0652664			0.077575			0.0510556
0.074303			0.202063			0.191718				0.0405802			0.0794687			0.0855769				-0.0947769			0.0670857			0.0598287
0.0414222			-0.289126			-0.0255972				0.0910346			0.0371104			0.102889				0.0803022			-0.132332			0.000274512
0.0925089			0.143076			0.0959568				0.0197052			0.0342796			0.08742				-0.000443376			-0.0341101			0.106429
0.0470057			-0.000482104			0.102689				0.0080915			0.0671401			0.0517534				0.117879			-0.018368			0.0981406
0.042957			0.220597			0.29325				0.00107569			-0.0869188			0.0718311				0.0186133			-0.0421321			0.0518222
0.115271			0.144508			0.183316				-0.0974669			0.02312			0.0540415				0.213977			-0.0860303			0.0404507
0.061548			0.0289559			0.0862783				-0.14613			0.00994155			0.0852362				0.12359			0.0689579			0.0719818
0.0471253			0.161482			0.138286				0.162886			0.0265834			0.0340548				0.166859			0.0751475			0.0551556
0.0696703			-0.00344414			0.081379				-0.0344241			0.0153774			0.0680943				0.0543073			0.160777			0.103504
-0.00798614			0.00987592			0.116403				0.114072			-0.0417305			0.0542536				0.0145333			-0.070854			0.102752
0.0399031			0.0147816			0.107663				0.0381902			-0.0384177			0.0497531				0.0907468			-0.115618			0.0118855
0.0433002			-0.0858053			0.0348795				0.0842927			-0.0116751			0.0266665				-0.0362317			0.0706334			0.0750843
0.0695675			-0.074275			0.0978265				0.0685941			0.257781			0.0627035				0.127065			0.0927742			0.0443069
0.0381932			0.122661			0.135224				0.0331962			0.306754			0.0670831				0.0150684			-0.0894886			0.0418859
0.0582688			-0.233014			0.161873				-0.0609287			0.257346			0.0612803				-0.00319809			0.0136726			0.162795
0.00766419			0.169597			0.0646272				0.0149365			0.317697			0.0517578				0.00956052			0.164472			0.0244738
-0.0537509			0.108341			0.0754523				0.00200728			0.27015			0.0274288				0.028735			0.0899565			0.0703906
0.0611327			0.271689			-0.0230925				0.00544943			0.323033			0.0531005				0.0176089			0.0901734			0.0653285
0.0272491			0.0136698			0.0762325				0.0159359			0.300974			0.0353165				0.0596392			0.152176			0.0479175
0.0498508			-0.00525365			0.00753165				0.00552719			0.271778			0.0581018				0.0267043			0.0345925			0.0396216
0.051322			-0.0284792			0.0424005				0.000482268			0.245624			0.0892557				0.0605131			-0.0837033			0.00831124
0.0184253			0.0167361			0.0680465				-0.0208775			0.396544			0.0729443				-0.00632423			-0.0486022			0.0475842
0.0241751			0.021557			0.0717711				0.0137705			0.301517			0.101988				0.00978855			0.0823138			0.129097
-0.00448761			0.147341			-0.0138439				0.0117198			0.327846			0.0693096				-0.0173973			0.0480609			0.048402
-0.0019763			-0.221102			0.0508097				0.0148479			0.323542			0.06634				0.0170711			0.0484249			0.183424
-0.00381409			0.125485			0.0261951				-0.00439861			0.315945			0.0809123				-0.0345858			0.0417777			0.143785
0.00803016			0.0351986			0.10182				-0.0227176			0.288241			0.0377395				0.0651443			0.0364662			0.0236986
-0.0363247			0.00337237			0.0766042				-0.0155985			0.287854			0.067345				0.0156986			0.0922819			0.022829
0.0576758			0.0350216			0.00153189				-0.0291911			0.301756			0.0826045				0.0227271			0.0377921			-0.0177259
0.006083			0.0878832			0.0805672				-0.00527115			0.271106			0.0562267				-0.00074245			0.148534			0.188162
0.056581			-0.009497			0.0351275				0.0142492			0.369583			0.0636073				0.00468806			0.154932			0.178406
0.0555121			-0.00437388			0.11769				0.0120392			0.381808			0.054352				-0.00555936			0.0114962			0.0551972
0.0547161			0.0365558			0.0527714				0.0085916			0.412137			0.0569554				-0.00409615			0.0195481			0.14782
0.000553251			-0.120203			0.100925				0.0192781			0.258114			0.0392392				0.00957384			0.111585			0.0159042
-0.102163			-0.0182863			0.0535768				-0.00600181			0.314474			0.0843686				0.0190858			0.0903558			0.060145
-0.0856184			-0.021233			0.0646289				0.0164202			0.292628			0.0738189				0.0562411			0.109417			0.13182
0.006206			-0.0686543			0.131345				0.0143696			0.344937			0.0445798				-0.017704			0.123724			0.0465557
-0.0393806			0.0864284			0.0901213				0.0257886			0.356834			0.0401063				0.0352244			-0.00356237			0.10758
0.0404875			0.0230698			0.0225908				-0.0215527			0.378818			0.0369955				0.0252731			0.0305428			0.0326824
-0.0414709			-0.0140587			0.153358				0.0373383			0.31779			0.0733515				-0.0427304			-0.0249795			0.118306
-0.0261789			0.0613763			0.0547127				0.00909334			0.2489			0.153064				-0.0827838			-0.0278422			0.0905638
-0.00816135			0.058025			0.10257				0.018891			0.251945			0.110275				-0.00265538			0.0642566			0.167558
0.0192307			0.0142204			0.122638				-0.00126197			0.243831			0.128787				0.0100197			0.117683			0.14396
0.0532081			0.0127527			0.0825476				0.00244868			0.322894			0.134932				-0.0300679			0.0690527			0.044697
0.041635			-0.0356077			0.0461397				0.0159159			0.286834			0.133696				0.0619196			0.0451738			0.0438248
-0.0380696			0.0182715			0.0545055				0.0235755			0.374969			0.122542				0.010431			-0.0949936			0.0149392
0.0471961			0.0371245			0.146801				0.0396628			0.249945			0.142163				0.0173321			0.178718			0.0854374
0.0882592			0.0468913			0.0819539				0.0188222			0.359297			0.137365				-0.036075			0.0891242			0.015251
0.0612083			-0.0292337			0.0796093				-0.00788775			0.278233			0.162162				-0.0332236			-0.0183437			0.0802314
0.0734919			0.0110346			0.106673				-0.0351166			0.355004			0.139461				0.00683105			-0.225403			0.122709
0.082303			0.0248003			-0.011342				0.0345376			0.27483			0.125836				0.0322584			-0.0266797			0.173617
0.183831			0.105209			0.0469709				0.0643678			0.335368			0.106296				0.0574583			0.0185683			0.223806
0.0626979			0.0029112			0.114581				-0.0498486			0.221334			0.149656				0.0754836			-0.0430624			0.150824
-0.16356			0.066393			0.129791				0.0531088			0.304024			0.160919				-0.00912366			0.0432395			0.368932
0.0395045			0.0339552			0.11664				0.0550123			0.419796			0.194372				0.0252123			0.141931			-0.0193745
0.112922			-0.0223646			0.0951043				0.0987562			0.317055			0.162682				-0.0628785			-0.0327095			0.0815763
0.183955			0.0477411			0.096187				0.000900645			0.365064			0.145288				0.0532338			0.0365608			0.10829
0.210162			-0.0194348			0.0778588				0.0624508			0.343722			0.173513				0.00415647			0.00475579			0.070352
0.0697942			0.0567005			0.0651819				0.115938			0.330938			0.173132				0.00815399			0.0438441			-0.0966658
0.0972669			0.0058338			0.0809557				0.0522319			0.329805			0.120996				0.0429084			-0.0741928			0.124874
0.0565391			0.0608118			0.0816179				0.0647667			0.321762			0.163431				-0.0493888			0.121039			0.228486
-0.0760751			0.000298533			0.0993645				-0.0323027			0.357471			0.15167				0.0111361			0.0261932			0.199627
0.0210071			0.0262723			0.0611514				0.0433802			0.308709			0.126808				0.0267826			-0.109551			0.101255
-0.0391226			0.0124087			0.118002				0.0785984			0.233136			0.158464				0.0548485			-0.0673851			0.239715
0.0255858			-0.00145795			0.149894				0.0401187			0.262726			0.106988				-0.0230366			0.036548			0.0987173
0.021872			0.0381191			0.101951				0.0761135			0.382633			0.0583271				-0.00667972			0.010474			-0.32566
-0.172292			0.04032			0.0352259				0.0497195			0.372309			0.0213247				-0.0238186			-0.0247506			0.006195
0.110329			0.00701937			0.0419328				0.0529408			0.342889			0.0557091				0.0321095			0.0505154			0.0130765
0.0870945			-0.0562896			-0.024819				0.0679944			0.39731			0.0658444				0.0351204			0.0369936			0.0580096
0.00696244			-0.00262466			0.0456347				0.0910193			0.415003			0.045982				-0.0312142			-0.00528479			-0.996923
0.00951667			0.0682311			0.0227765				0.0411503			0.273894			0.0614778				0.0524534			-0.0198106			0.239505
0.0458006			0.0413772			-0.0249801				0.0674545			0.260369			0.0475701				-0.0358674			-0.028931			0.290924
0.0675204			-0.012023			0.0544037				0.0488636			0.454993			0.0451967				0.0368789			-0.0578325			4.62096e-05
0.0391519			0.0742275			0.0124922				-0.0056541			0.378744			0.0704234				-0.00363916			0.00400818			0.0927183
0.111851			0.0445496			0.0314998				0.00616184			0.36888			0.0580368				-0.0212373			0.00891944			-0.138803
0.0287166			0.0869708			0.0875045				0.0585765			0.397812			0.0399728				0.0437598			0.0306885			0.197347
0.0800122			0.0106799			-0.000113802				0.0699819			0.303882			0.0614751				0.0526802			-0.01049			0.346039
0.034212			0.0512176			0.155536				0.0740924			0.248235			0.0400145				0.0483171			-0.0395976			-0.0169353
0.0225306			0.00946344			0.0531344				0.139306			0.439977			0.0485119				0.0233645			-0.108031			-0.0311646
0.0237636			0.0405723			-0.0465426				0.189239			0.312242			0.0482998				0.0255902			0.0599664			0.180075
0.0495098			0.00166686			0.0237878				-0.0725244			0.381609			0.0621				0.0492806			0.048809			-0.0498608
-0.0655659			0.0643928			-0.0752199				-0.191883			0.323177			0.0468971				0.0121462			0.0314648			0.185894
0.0477387			0.0348463			0.0273173				-0.215008			0.322035			0.0569601				-0.0210435			-0.0148472			0.177094
0.0608513			-0.0229774			0.0626441				0.208974			0.335709			0.0325148				0.0646599			-0.0553508			0.0775121
0.0150049			0.0546178			0.0442632				-0.22875			0.424111			0.0673047				0.0262686			0.0449514			0.0705682
0.0303072			0.0138976			0.0966355				0.0471575			0.304234			0.0374669				0.0611086			-0.0836709			0.0549115
0.0400193			-0.0126274			0.0126803				0.0140867			0.352289			0.0490837				-0.0104489			-0.0599773			0.22934
-0.0061416			0.00788386			-0.0819491				0.127408			0.300678			0.0555249				0.0412446			0.0735277			0.16984
0.0314867			-0.0331306			0.0614577				0.0465195			0.263731			0.0492868				-0.0115555			0.0955777			0.296483
-0.204047			0.030341			-0.0895831				0.0668729			0.243161			0.0457823				0.0305867			0.091691			0.231912
0.128296			0.0103107			-0.429063				-0.0924197			0.306258			0.0481576				0.0639869			-0.0145773			0.158549
-0.102668			0.000677551			-0.0496831				0.110643			0.194943			0.0420877				0.00746193			0.0336068			0.263445
0.0680089			0.0103743			0.0466334				0.0414278			0.31995			0.03528				0.0354398			-0.0156874			0.298264
0.0666454			0.0193747			-0.0411227				-0.0395597			0.316885			0.0272835				0.0260802			0.0767515			0.210174
-0.0204493			0.0512587			-0.0626462				0.145066			0.336436			0.0284232				0.0268701			0.0704412			0.128192
-0.0173824			0.0499107			0.0489621				0.115951			0.363244			0.0318762				0.0834868			0.0352555			0.165761
0.0867401			0.003577			0.0978499				0.027765			0.234029			0.0494826				0.0642335			0.0836376			0.140596
-0.0330616			0.066324			0.0804438				0.124051			0.3033			0.0490482				-0.0180583			0.00626808			0.0920355
0.0735548			0.0390346			0.0580745				0.264965			0.310183			0.0379957				0.0407602			0.0706191			0.120783
-0.0536491			0.0370549			-0.0286904				0.174601			0.276173			0.0330518				-0.0190987			0.132072			-0.0108072
-0.0121889			0.000789503			-0.113776				0.175046			0.256417			0.0295741				-0.0114464			-0.00100622			0.0910727
-0.0799603			0.0477305			0.0260007				0.120605			0.0746032			0.0244955				0.0136766			-0.0065742			0.275076
0.0620961			0.12322			0.0146339				-0.215851			0.114174			0.0354465				0.00806281			0.0210392			0.070545
-0.280109			0.0197022			0.0905881				-0.0964137			0.0804975			0.0310274				-0.00793101			0.0786241			-0.0958665
0.021523			0.110183			0.062489				0.166819			0.152104			0.0640774				0.0700117			-0.0078806			0.114742
-0.0604369			0.0845903			0.13665				0.075105			0.213757			0.0413003				0.0283838			-0.0468979			-0.0164219
-0.169542			0.10128			0.0464018				0.0151929			0.127403			0.0220891				0.0198815			-0.0391193			0.0348308
-0.188816			0.100857			-0.113672				-0.0668498			0.12755			0.0311805				0.0295172			-0.134809			0.0836442
-0.0125748			0.00462776			-0.0464952				0.0240404			0.116747			0.0198702				-0.0143964			0.195359			0.0121886
0.0112042			0.092395			0.0145052				0.0750303			0.12123			0.0454469				0.0698689			-0.146364			0.0629487
0.0147993			0.0931403			-0.00450574				0.0506757			0.129873			0.0287413				-0.00626335			0.0560733			-0.10887
0.00347303			0.0236474			0.0341538				0.0530989			0.176618			0.0347044				0.0361191			-0.0483696			-0.0880332
-0.0777713			0.0943367			0.0884847				0.118975			0.106868			0.0402943				0.0422096			-0.108281			-0.0796591
0.0684893			0.0367152			0.0928586				0.00293267			0.126584			0.0496495				0.048609			0.0337812			0.0160331
-0.0207482			0.0350903			-0.0302463				0.0297418			0.162972			0.0192957				0.0495444			0.0248981			0.0292794
0.00709822			0.0288858			-0.00209968				0.0261338			0.1316			0.0378741				0.0357747			-0.0446714			-0.0540381
-0.0471653			0.0350445			0.0119943				0.0512023			0.176793			0.0289319				0.0165931			0.10302			0.0170037
0.0611525			0.0158773			0.204671				0.00490848			0.184312			0.0324715				-0.0295847			0.0898174			0.0862104
-0.0739808			0.0586613			-0.0668085				-0.0378112			0.151168			0.525942				0.0215819			0.186189			0.108076
-0.0028338			0.0698111			0.119386				0.0166615			0.140334			0.468477				0.00113163			-0.0129286			0.00472116
-0.223358			0.0860915			0.104083				0.024599			0.0871729			0.367074				0.0300421			0.0155456			-0.11412
-0.0947007			0.0481522			-0.134171				0.0665806			0.131651			0.379601				-0.0463341			0.0466114			0.01242
0.0682619			0.0225019			0.081189				0.0523909			0.0944842			0.443435				0.0309613			0.0972736			-0.0618756
-0.0528009			0.0613236			-0.0045875				0.0517199			0.158954			0.434837				0.0208595			0.0153873			-0.00196257
0.0966937			0.0877635			0.0681512				0.000935997			0.18814			0.471821				0.0369574			0.0645839			0.0309039
0.1181			0.102834			0.0799959				-0.031362			0.125452			0.456325				0.0411465			0.0452931			-0.0488183
-0.00998932			0.0820956			0.00135487				-0.0260308			0.114137			0.339308				0.0239197			0.148439			-0.150491
0.0130976			0.090684			0.0403446				-0.0183646			0.143937			0.429728				0.0618577			0.0266928			-0.0651838
-0.111383			0.0130531			0.021569				-0.000693655			0.172038			0.252992				0.0690859			-0.0644471			0.00208394
0.00178821			0.0159162			0.00869456				-0.0385924			0.125806			0.397959				-0.00624738			0.272373			-0.0933249
-0.0601403			0.0538398			0.0976811				0.0295221			0.179878			0.491808				-0.0677581			0.0389137			0.0589397
0.160357			0.0330544			-0.0119359				0.0547808			0.14665			0.510888				-0.0518934			-0.0389948			-0.0279161
-0.0881519			0.106141			-0.0312338				0.0603932			0.105839			0.453324				0.0473239			0.0398994			-0.0256115
0.0688899			0.0362488			0.0113487				0.092892			0.170388			0.456205				-0.004564			0.0229979			0.0160692
-0.0305167			0.0384164			0.089081				0.0327624			0.147506			0.558072				-0.00377164			0.0106606			-0.0644771
0.0434602			0.0568026			0.0873682				0.0114875			0.139229			0.515365				-0.0347258			0.0367465			0.0166586
0.165759			0.0545089			-0.0503812				-0.00389889			0.144012			0.46705				0.0505951			0.16174			-0.0162918
0.112917			0.0261585			0.0410904				0.0368219			0.0832316			0.463407				0.0554466			0.00723344			0.0144575
0.0574282			0.0421273			-0.0353832				0.0705122			0.163513			0.490484				0.044416			0.00724379			0.0554519
-0.158953			0.00920254			0.00377089				0.0479301			0.147054			0.506053				0.0763945			0.0373993			0.0249406
0.0791441			-0.0725597			0.0741117				0.0587653			0.147008			0.457463				0.0443831			0.13025			0.0773132
0.112615			0.00969176			0.0845942				0.00481581			0.201183			0.460379				0.125662			0.198408			0.0459597
0.0796878			0.0805289			0.0696062				0.0119476			0.190126			0.324416				-0.0237261			0.321536			-0.0283506
0.104349			-0.0017779			0.0913457				-0.0411901			0.154947			0.438843				0.0757796			0.463406			-0.073088
0.0914964			0.0462331			-0.0063381				0.0483789			0.146321			0.456279				0.0647039			0.372124			-0.141355
0.115673			0.0629129			0.0687925				0.00352752			0.0769718			0.589418				0.0401251			0.228232			0.00914054
0.123573			0.05368			0.00562624				0.0336677			0.187192			0.399793				0.0263353			0.0452549			-0.0183808
0.130141			0.0452499			0.0422296				0.0585394			0.194133			0.393516				0.01483			0.106559			-0.054876
0.0802594			0.0371278			-0.0764617				-0.0903299			0.166823			0.384721				0.0264486			0.0159565			0.0566714
0.0934377			0.083781			0.0423888				0.0511496			0.160536			0.361433				0.0540252			0.267374			-0.109473
0.104965			0.14686			-0.0848863				0.0743291			0.165622			0.444015				0.0197401			-0.0592384			0.0101047
0.0914777			0.0266416			0.0550697				0.0594413			0.181367			0.410774				-0.0314541			0.130416			0.0820211
0.100657			0.0406719			-0.0206353				0.115236			0.133977			0.341562				0.0272273			0.0693983			0.0118682
0.0920936			0.0672716			0.0294998				0.0469583			0.134481			0.331102				0.0801854			-0.0281763			0.0632169
0.0884473			0.110102			0.0412502				0.0588847			0.11224			0.604296				0.0440935			0.111742			0.145492
0.104424			-0.0109351			0.120901				0.0355775			0.0704447			0.355486				0.0535986			0.0255724			0.156214
0.0888429			0.0764916			0.181879				-0.00480135			0.208203			0.431889				0.062333			-0.0081582			0.0701456
0.0914293			-0.00152922			0.113424				0.037673			0.14511			0.319521				-0.0465302			0.144294			0.0476185
0.0956637			-0.0590976			0.129511				0.0967496			0.210905			0.400008				0.0265098			0.0392908			0.0804901
0.0927286			0.0186737			0.00113653				0.0970698			0.180656			0.395028				0.0136685			0.0470085			-0.111356
0.0771708			0.00923064			0.183109				-0.00833054			0.111141			0.337794				0.086378			-0.0141712			0.0902585
0.0953638			0.0549294			0.123147				0.0702044			0.185615			0.453397				-0.0070676			-0.0523441			0.035401
0.0968472			0.0194734			0.118042				0.0803498			0.165306			0.643091				0.00125438			0.0607958			0.0816321
0.0900973			0.028787			0.0968724				-0.00421268			0.151584			0.530737				0.120516			0.059979			0.0304218
0.0654304			0.204158			0.0717977				0.0957334			0.118118			0.472204				0.050743			0.158733			-0.127056
0.0471083			-0.17986			0.0925675				0.0461984			0.118769			0.571881				0.0294962			0.0372667			-0.143849
0.0794304			0.0674252			0.0555145				0.0282929			0.140674			0.651629				0.113476			0.0139411			-0.123024
0.0511119			-0.0172219			0.0295941				0.0238519			0.082854			0.523481				0.0748755			0.0914051			-0.0435407
0.0989036			0.0967011			0.123641				-0.0291668			0.109184			0.340682				0.0729877			0.0120031			0.0093593
0.0917715			-0.0463112			-0.00511593				0.0840535			0.10455			0.487567				0.0215287			-0.18947			-0.0276054
0.0740161			0.0692731			0.105043				-0.048897			0.114178			0.488612				0.0967699			-0.0810454			0.0193937
0.0775728			0.00825919			0.0865864				0.0189908			0.192229			0.367827				0.109448			0.199474			-0.0211709
0.0779198			0.0364795			0.000904912				0.00404203			0.0909763			0.271787				-0.0496533			-0.00924217			-0.0368657
0.0887968			0.127717			0.106125				0.0764162			0.170212			0.452458				0.111397			0.05293			0.00139673
0.0909402			0.0583115			0.0570732				0.0560754			0.257093			0.434822				0.048576			-0.0165419			0.0217243
0.0652563			0.0485967			0.0730557				0.189643			0.144594			0.475697				-0.00550055			0.0388472			0.0167345
0.100425			0.0065577			-0.0183194				0.0069518			0.151233			0.403574				0.019206			0.059168			0.0506778
0.0852903			-0.0485854			0.0397994				0.130307			0.0824655			0.421175				0.0803166			0.040951			0.0894217
0.0887665			0.0339889			0.0704899				0.073401			0.0259869			0.391106				0.0466846			0.0159173			0.0541388
0.0478107			-0.0633168			0.0418911				0.0599313			0.168684			0.411905				0.0943635			0.0123049			0.102498
0.068498			-0.0601766			0.10024				0.167544			0.138644			0.477853				0.0778762			-0.0834389			0.0086857
0.100202			0.018704			0.0279706				0.0369945			0.136198			0.450249				0.0439622			-0.0292831			0.0399932
0.0714051			0.0676669			0.0118009				0.00543935			0.163915			0.451084				0.0890461			0.0161606			-0.00803543
0.080469			-0.00329443			0.0484939				0.104695			0.0798341			0.435861				0.10676			-0.185392			0.0723556
0.0734309			0.0374973			0.0164594				0.0459662			0.152933			0.399445				0.0956324			0.10131			0.0100971
0.0657409			0.00539368			0.093746				0.0187276			0.156577			0.460139				0.129949			-0.0387192			0.0894863
0.0570973			0.0255915			0.0324561				0.047242			0.216479			0.451977				-0.0237169			0.00826761			-0.0413984
0.0688671			0.0667575			0.0964506				-0.0101327			0.227376			0.461202				0.103824			0.0771397			0.00509444
0.0607277			0.115053			0.0776171				-0.0428718			0.130244			0.36297				0.118092			0.0685027			0.0641844
0.0441727			0.0621668			0.0890434				0.0385785			0.237597			0.51536				0.0878291			0.108099			0.000330781
0.0770116			0.076343			0.0282086				0.0548198			0.240711			0.362748				-0.170022			0.144044			0.0754861
0.0794894			0.0789637			0.0609129				-0.00271944			0.20252			0.440204				0.00207296			0.0384832			0.0722904
0.0559096			0.0140715			0.06084				-0.00242542			0.35143			0.513956				0.102175			0.0642475			0.0507573
0.0623723			0.0431429			-0.0281516				-0.00637754			0.275056			0.454183				0.0310285			-0.223874			-0.073182
0.0746266			0.108761			0.106188				-0.0192737			0.25148			0.457999				0.00814452			0.156171			0.0182806
0.0666937			0.00945582			0.0468634				-0.0518365			0.172881			0.496276				0.00129481			0.0829755			0.0675707
0.0623447			0.0587846			0.0475154				-0.059092			0.270098			0.562731				0.0390741			0.144898			0.0270733
0.0696329			0.0248879			0.116286				0.0192416			0.315475			0.333906				0.09315			0.139794			0.0774735
0.0412981			0.10934			0.092989				-0.0358565			0.222022			0.461132				0.176009			0.0894435			0.0536691
0.0473977			0.0240956			0.0742353				0.0272726			0.241306			0.40857				0.14559			0.00360837			0.0647589
0.0682566			0.101285			0.0372968				-0.0269903			0.208336			0.458221				0.0837334			0.277285			0.0367879
0.0806155			0.14863			0.113497				0.0104547			0.273192			0.459116				0.0427093			0.0783824			0.03143
0.0749191			0.102779			-0.0159514				0.0136912			0.263489			0.472289				0.00210961			0.16124			0.132416
0.0665303			0.145209			0.081422				0.0197312			0.220874			0.288476				0.0274265			0.0747374			-0.057408
0.0616514			0.0963564			0.0524943				0.0336467			0.229358			0.401492				0.138686			0.0178778			0.0666164
0.0576602			0.0746126			0.00548635				0.0943752			0.283996			0.45801				0.138094			-0.162589			-0.0146591
0.0707403			0.124803			0.0766019				-0.0557445			0.213187			0.233187				0.019365			-0.098897			0.0139903
0.0486742			0.0522965			0.0348768				0.0758859			0.195761			0.448105				-0.0856662			0.271668			-0.0331294
0.0620934			-0.00875418			0.0523688				0.0100606			0.263609			0.474169				0.135776			-0.0654317			0.0452076
0.0430783			0.0935442			-0.016707				0.0593668			0.251309			0.49634				-0.0147037			0.115385			0.031115
0.0432538			0.00593874			0.133896				0.0049806			0.218007			0.353247				0.0832794			0.220605			-0.00446328
0.0357287			-0.0239962			0.10204				0.0338556			0.277488			0.461823				0.159765			0.127074			0.105923
0.0336929			-0.0166597			0.0745536				0.0156031			0.192544			0.464767				-0.00630939			0.0580916			0.0997102
0.0571714			-0.0590391			-0.0289948				0.0247189			0.122955			0.446735				0.0100373			0.168882			0.0920115
0.0504043			0.0524819			0.101832				0.0228128			0.11469			0.212122				0.154817			0.151656			0.163583
0.0480145			0.1566			0.285094				0.037077			0.0932381			0.401893				-0.0393849			0.0689322			0.121639
0.0269244			0.14275			0.128867				0.0587061			0.105953			0.426089				0.061036			-0.0731871			0.0906897
0.0329441			0.0529106			0.105706				0.048514			0.135599			0.458759				-0.0295517			0.0250423			-0.0294407
0.034			0.0558275			-0.399719				0.0859114			0.145408			0.460334				-0.00153361			0.182083			0.0190517
0.0598841			0.0647716			-0.0275487				0.0474974			0.112484			0.343579				0.0574835			0.122919			0.0663946
0.0531375			0.0766897			-0.05272				0.0250218			0.113538			0.422631				-0.0166926			0.0465708			0.0676353
0.0529159			0.0113005			-0.0865361				0.0330242			0.0783103			0.386007				0.0101596			0.13462			0.0757147
0.0711409			0.0105214			0.0578774				0.0220031			0.113121			0.328231				-0.114425			0.011091			0.12803
0.0607609			0.107408			-0.160302				0.0455066			0.102529			0.358494				-0.000838715			0.142243			-0.0198683
0.0635279			0.0893393			-0.0286963				0.0660288			0.0897051			0.444242				0.115827			0.0626812			0.044343
0.065821			-0.0296313			0.0546558				0.057114			0.117137			0.420272				0.145358			0.0934367			0.0780208
0.0615078			0.0543788			-0.0146544				0.0655726			0.199592			0.388192				0.063604			0.0980544			0.0283473
0.0631904			0.103447			0.0699162				0.0758986			0.118226			0.389903				0.146386			0.233439			0.137665
0.0318957			0.0395115			0.0943497				0.0583652			0.188882			0.418478				0.157408			0.0551223			-0.014641
0.0539017			0.176409			0.0310912				0.0703072			0.128311			0.416598				0.0359198			0.120389			0.189661
0.0520824			0.0431721			0.042698				0.0417215			0.144621			0.414964				0.058144			0.0552693			0.0176033
0.0480639			0.0459715			0.0556786				0.0513811			0.110052			0.463676				0.145544			-0.0428146			0.036693
0.0709767			-0.0533261			0.12893				0.0672501			0.0955165			0.34297				0.049248			0.139053			-0.00520849
0.0598125			0.0908354			0.107173				0.023873			0.114168			0.511928				-0.0197879			0.0406286			0.148656
0.0592905			0.0573053			0.086998				0.0479363			0.18923			0.466643				0.0117369			0.264463			0.0732061
0.0520926			0.0384707			0.0713233				0.0487991			0.170363			0.44299				0.0810687			0.0068451			0.0220876
0.070485			0.0504822			0.0955501				0.035995			0.110717			0.526646				0.109056			0.109378			-0.00873764
0.0575612			0.134907			-0.0737956				0.0452451			0.120385			0.377501				0.0170289			0.039983			0.0170077
0.0525058			-0.0333649			-0.199784				0.0429611			0.152372			0.319248				0.075785			-0.111118			0.0711644
0.0666508			0.102046			0.12626				0.0305528			0.186281			0.335102				0.0220628			0.0917655			0.0457999
0.0362983			0.0820491			0.475785				0.00803264			0.172192			0.2984				-0.00702955			0.1643			0.0960305
0.0407993			0.0996845			-0.0266405				0.0317153			0.162083			0.26969				0.108056			-0.122173			0.00094806
0.0495318			-0.00774804			0.214062				0.0268413			0.170227			0.379979				-0.0355692			-0.0183848			0.00577155
0.0531596			0.0589214			0.0217148				0.015502			0.168519			0.420776				0.0631694			-0.108242			0.100919
0.0352926			0.0116428			-0.14984				0.0675183			0.115923			0.444345				-0.0784673			-0.264634			0.0853174
0.0469687			0.0593659			-0.19086				0.0980626			0.160947			0.354749				0.0466384			0.0653941			-0.0319101
0.0602799			-0.0318026			-0.0018719				0.0683353			0.146357			0.394909				0.163859			-0.0399073			0.0670141
0.0499927			-0.00961771			0.0705808				0.0571815			0.190657			0.323074				0.0598875			0.756605			0.0215413
0.0511409			-0.0293688			0.0215046				0.0537082			0.127763			0.400234				0.0720269			0.0806156			-0.0141456
0.0596026			0.101328			0.106119				0.0440828			0.162935			0.491078				-0.0100644			0.0355046			0.144822
0.0748984			0.0181543			-0.00815846				0.0383829			0.16481			0.418846				0.0708409			0.00854449			-0.00307278
0.0884033			0.0096723			-0.0446759				0.032954			0.197768			0.485308				0.0796845			-0.12691			0.0593062
0.0753678			0.0237646			-0.0462092				0.0388273			0.0955755			0.477189				0.111062			-0.0146703			0.0528466
0.0751627			0.0452094			0.112306				0.032407			0.162397			0.29916				0.0814165			0.072364			0.0865369
0.0631883			-0.01788			0.0334744				0.0503747			0.124924			0.272446				0.0527373			0.0143067			-0.0547468
0.0533671			0.0356029			-0.0485936				0.0410359			0.139304			0.321097				0.0906132			0.0280419			0.115673
0.0738805			0.0423083			0.182431				0.0502675			0.115947			0.299378				0.0319429			0.0371369			0.0408853
0.0671092			0.0631711			0.135669				0.0251807			0.110079			0.229771				0.121706			0.0176398			-0.0182539
0.0665732			0.0294797			0.0641922				0.0268308			0.193162			0.317961				0.044945			0.0466506			0.0696977
0.0662715			0.0656481			-0.0150942				0.0193773			0.120068			0.403982				0.00303831			0.0480916			0.029878
0.0671759			0.0528145			0.178378				0.0480009			0.127475			0.384239				0.0449031			0.0453636			0.118681
0.0579387			0.0251814			0.124919				0.0359595			0.145447			0.510793				-0.0747483			0.0532427			0.0492973
0.0713943			0.0626101			-0.305385				0.0671553			0.149452			0.473062				0.0458809			0.0172466			0.0969452
0.0586598			0.0201195			-0.178067				-0.0161228			0.124701			0.479821				0.0891651			0.0363309			0.034582
0.0661634			0.00226464			-0.0447734				0.0191787			0.161384			0.310491				0.0268003			-0.00190959			0.1533
0.0642073			0.0523324			0.0427853				0.0569692			0.164561			0.363137				0.153001			-0.00903648			0.12621
0.0577792			0.06865			0.263162				0.0320935			0.0711905			0.567451				0.0484415			0.0221417			0.126904
0.0611269			0.0519324			0.0371009				0.0368389			0.162748			0.399674				-0.00947667			0.0232888			0.00158861
0.0664757			0.101985			0.350835				0.0374058			0.0825196			0.31516				0.0551693			0.020864			0.146909
0.0600139			0.052005			0.691882				0.0335271			0.137566			0.159349				0.106325			-0.0201823			-0.000146262
0.0743228			-0.0403519			0.00632703				0.0614084			0.011571			0.475254				0.136868			0.0203466			-0.0529345
0.0579598			0.0515245			-0.126412				0.0464859			0.0412145			0.504659				0.0321186			0.0101466			0.0105576
0.0690664			0.0888115			0.136579				0.0398385			0.0774161			0.467737				-0.16554			0.0628454			0.088703
0.0680119			0.0321354			-0.164715				0.0528448			0.023434			0.453844				0.0538048			0.0593771			0.0515617
0.0593951			0.041684			0.068012				0.0345929			0.193153			0.457923				0.00529549			0.0118307			-0.0332558
0.0458466			0.0779957			0.04388				0.0409441			0.0261244			0.513261				-0.0433909			0.0606206			-0.00792775
0.0576534			0.0155932			0.0352496				0.029297			0.021336			0.504004				0.0494236			0.0504664			0.0765749
0.0580984			0.0495498			0.0868609				0.0354954			0.0659097			0.469538				-0.00292049			0.0503872			0.0866215
0.0519996			-0.00532144			0.0449912				-0.0110605			0.0458635			0.504431				-0.0398005			0.0303091			0.0846687
0.0722951			0.0915951			0.277571				0.0467841			0.00220021			0.256705				-0.00420918			0.0168063			-0.0294376
0.037251			0.0537313			-0.0604871				0.00427636			-0.0426523			0.48635				0.0791996			-0.00279883			-0.0494029
0.0703842			0.0164683			0.190366				0.0227205			0.0782471			0.515809				0.077635			0.0403036			0.0500243
0.0495766			0.0188737			0.0616041				-0.00990391			0.0423288			0.50727				0.0097589			-0.00388218			0.169001
0.0426104			0.0878631			0.104907				0.0316475			0.0860668			0.573265				0.0240107			0.0461229			0.0998616
0.0818699			0.0376453			0.126791				0.036929			0.128991			0.449108				0.00834446			0.0687901			0.023527
0.0925479			0.130477			0.0404736				0.0466216			0.129315			0.320361				0.0162189			0.0254686			0.0522597
0.0689655			0.0398418			-0.0871368				-0.00424118			0.106157			0.273025				0.0243029			0.0384997			-0.0013036
0.0721644			0.0833042			-0.0175614				-0.00387173			0.0525995			0.589668				-0.00794782			0.0860194			-0.00443121
0.0571603			0.0658998			-0.0114917				0.0148838			0.0603443			0.586602				0.0114921			0.0688162			0.0815107
0.0623895			-0.0695684			0.0388755				0.0153817			0.0548357			0.503305				0.035005			0.0900971			0.0900989
0.0460428			0.0345283			0.00210182				0.00189684			0.0696501			0.28013				0.0342754			0.0623261			0.153224
0.0570691			-0.00432514			0.0894622				0.0246749			-0.0269622			0.365287				0.0157823			0.0380411			0.0829584
0.0734688			0.00025915			0.0385633				0.019714			-0.044247			0.459921				0.0185772			0.00811433			0.15683
0.0676522			0.0135578			0.410853				0.0149479			0.0883886			0.315252				0.051808			0.053376			-0.0224178
0.0680918			0.0823882			0.420807				0.036724			0.15337			0.336924				0.0463021			0.037627			0.0536274
0.0621796			0.106239			0.309623				0.0635556			0.21837			0.270196				0.0321256			0.0456065			-0.00947238
0.0466085			-0.0276021			0.364485				0.0133755			0.0865606			0.356604				0.0187502			-0.0167914			0.107593
0.0424229			0.0450522			0.39964				0.0409561			-0.102068			0.503271				-0.016793			0.00905673			0.034511
0.0622975			-0.0264256			0.417292				-0.0377716			-0.0330279			0.501548				0.00680833			0.0131423			-0.0271789
0.0380646			0.129064			0.382123				0.0587562			-0.149055			0.444635				0.00769391			0.0469233			-0.00168074
0.0585352			0.0352309			0.091021				0.0696215			0.0752034			0.546682				-0.00232108			0.000594105			0.131807
0.0424598			0.0313458			0.190554				0.0582814			0.0511151			0.466726				0.0189476			0.0414659			-0.0119896
0.0454731			0.0891071			0.319269				0.0706732			0.172624			-0.0764453				0.0325638			0.0357322			-0.00383859
0.0326229			0.0517932			0.409431				0.0240264			0.0372078			0.349615				0.0647751			0.0244601			0.0445852
0.051287			0.121514			0.393238				-0.0248394			0.0828504			0.324212				0.0397732			-0.00318205			-0.0312991
0.0586084			0.0619022			0.411304				-0.122059			0.109402			0.454734				0.0256005			-0.0205913			0.0781909
0.0529191			-0.00145916			0.307815				0.0218146			0.115126			0.485882				0.0246491			0.0745524			0.0109925
0.0787541			0.0537544			0.289752				-0.031993			0.035563			0.301408				0.0242183			0.0491975			0.0196074
0.032606			-0.0208808			0.464924				-0.0113477			0.135919			0.498085				0.0281079			-0.00895082			0.0860401
0.052198			0.117114			0.42546				-0.0118175			0.0691363			0.480154				-0.000344715			0.0303346			0.0893231
0.0618335			0.0528841			0.384567				0.0330672			0.0316441			0.555043				0.00703661			-0.0115005			0.0403684
0.0530133			0.00196676			0.298281				0.00654083			0.107144			0.4334				0.0143821			0.0131523			-0.0465807
0.0328574			0.0377001			0.368715				0.00383325			0.192564			0.471203				-0.0125368			0.0541604			0.112473
0.0520225			0.0233291			0.231094				-0.0111708			0.0802839			0.50995				0.00977458			0.0535164			0.0688361
0.0425551			0.0965299			0.440934				-0.0629557			0.154735			0.551939				0.0365147			0.0146912			-0.0371362
0.0377448			-0.0223682			0.226782				0.00145992			0.0504958			0.581839				0.0015836			0.023572			-0.0120623
0.0766761			-0.0118842			0.551631				0.0603899			0.152724			0.432526				-0.0117409			0.0202268			0.108767
0.0562671			0.108812			0.358686				0.0345028			0.0952658			0.528015				0.00648719			-0.0140437			0.0979319
0.0593806			-0.00944975			0.255418				0.0641372			-0.0879171			0.532357				0.0161512			0.0655054			-0.117065
0.0722955			0.0653529			0.327435				0.0725421			-0.0802652			0.552401				0.0233123			0.0453601			0.0335938
0.0524402			0.0540162			-0.0139026				0.0503288			0.0894			0.547051				0.0115086			0.0542518			0.123137
0.0389253			0.0678356			0.00925403				0.0171927			0.120143			0.403413				0.0839129			0.0284628			0.0199358
0.058717			0.0931697			0.00477681				0.020873			-0.177943			0.364599				0.00379326			0.0054335			0.126921
0.058642			0.0290422			-0.00355698				0.0203954			-0.00269702			0.436213				0.0343076			0.0292197			-0.0421705
0.0640492			0.030272			0.0262015				0.0579721			-0.00913902			0.461918				0.0147585			0.00446011			0.130726
0.068029			0.038727			0.0174038				-0.000610834			-0.0813623			0.432652				0.0612876			0.0346489			0.0853978
0.0752893			0.0570753			-0.00652393				-0.0369902			0.126004			0.480501				0.0312942			0.0203675			0.0243751
0.057045			0.115558			0.0485319				0.0476676			0.0475399			0.443309				0.0347614			0.0480772			-0.02889
0.0656326			0.0474884			0.0330115				0.0508542			-0.16084			0.473087				0.0263532			0.0056284			0.0476729
0.0659358			0.0954989			0.0594703				0.0146462			-0.112749			0.347801				0.00572373			-0.018529			0.016959
0.0506212			0.080301			0.0333934				0.0647463			0.00508922			0.399225				0.00493049			0.0102667			-0.0086998
0.0460037			-0.0100667			-0.0674633				0.0169215			0.0423639			0.493615				0.0414319			0.0437655			0.0116815
0.0446475			0.0522554			0.054387				0.0169587			-0.0834162			0.558498				0.0130938			-0.0531913			0.100129
0.0556248			0.105583			0.00969776				0.061818			0.114772			0.421038				-0.000155608			-0.0107025			0.0286339
0.0350137			0.0669998			0.00305041				-0.0374009			-0.0168026			0.395434				0.0186174			0.0279891			0.091366
0.0529441			0.0763829			0.022224				0.0696978			-0.109782			0.52886				-0.000187955			0.0680524			0.0565152
0.0660262			0.0779487			0.0483856				-0.07882			0.171088			0.442411				0.00964024			0.0322361			0.0622453
0.0384618			0.0583226			0.0446009				0.0477051			-0.0878782			0.530784				0.0274367			0.0597534			0.0489694
0.0702956			0.0802537			0.027921				0.118232			0.0880347			0.370047				0.0499362			0.00811226			0.0984183
0.0515808			0.0731764			0.0516946				-0.00946603			0.153819			0.464066				-0.0155178			-0.00158626			0.0537573
0.0512141			0.0173762			-0.000994627				0.109213			-0.0802257			0.511193				0.038227			-0.0167472			0.143431
0.0541217			0.011424			0.0461312				0.0933097			-0.0143919			0.480652				0.0444519			0.043435			-0.0548125
0.0494439			0.0390429			0.0207994				0.0477583			0.0424634			0.468469				0.0219161			0.0182839			0.0965441
0.0470026			0.0490081			0.0520029				-0.00661325			0.00477147			0.587356				0.0570052			-0.0164027			0.0570732
0.0611807			-0.107669			0.0550053				0.0484424			-0.0637584			0.440874				0.0424508			0.0575821			0.145151
0.0555945			-0.107206			0.0331485				0.0424651			0.118774			0.475958				-0.0145592			0.0466389			0.0563548
0.045338			0.0392278			0.039749				0.108124			0.0192036			0.590619				0.026236			0.0707515			0.184817
0.0707346			-0.0114282			0.0599048				0.0334142			0.241186			0.613723				0.0518268			0.0328848			0.105286
0.0606051			0.00533215			-0.0218077				0.0927965			-0.193462			0.471092				0.0288441			0.056303			0.0415805
0.0510281			-0.0198517			0.031631				0.0627016			0.0207319			0.506502				0.0349095			0.00135967			0.186482
0.0244708			0.115564			0.0817747				0.0304203			-0.0176891			0.483079				0.0363398			0.0446202			-0.00176946
0.0603731			-0.123389			0.0151521				0.0786032			0.206966			0.172478				0.037996			0.100012			0.0581022
0.065938			0.0686806			0.00209736				0.137652			0.117468			0.167854				0.0632205			0.0144864			0.115206
0.0587923			0.0836614			0.0331048				0.0312152			-0.0216658			0.177163				0.0169595			0.062583			-0.0125323
0.0397752			0.0588249			-0.00604737				-0.0154383			0.0826781			0.279401				0.0831983			-0.0293104			0.129807
0.0741147			-0.0558801			0.0381247				0.00323781			-0.0509631			0.284488				0.0778082			0.00770153			0.0934984
0.0513375			0.128499			0.0330432				0.0443665			0.139715			0.0921088				0.0102676			-0.00741449			0.130402
0.0314893			0.012517			0.0419387				0.0456578			0.0740993			0.236581				0.00945842			0.034817			0.0541343
0.0556689			0.0076764			0.0208351				0.0224078			-0.0432371			0.228134				0.0500742			0.0462393			0.108514
0.0723492			0.144361			-0.00408799				0.0265361			0.136787			0.223296				0.118241			0.0865131			0.0795087
0.062352			-0.0976475			0.00790711				0.0675011			-0.00961613			0.13303				0.0577999			0.108522			0.128194
0.0745371			0.0209751			0.0604321				0.0664287			-0.292812			0.117545				0.0825215			0.0126786			-0.050808
0.0502492			0.0895386			0.00655512				0.000998706			0.213727			0.10463				0.10537			0.0402139			-0.0120658
0.0559941			0.126513			0.0171131				0.0467504			0.150321			0.193619				0.107421			-0.00447902			-0.167785
0.0280992			0.0216776			0.023769				0.0204909			0.0724361			0.166765				-0.0131269			-0.0311494			0.0833994
0.047259			0.108428			0.0566751				0.0198753			0.09895			0.114603				0.0430454			0.0780181			0.0997784
0.0624397			-0.107062			0.0513747				0.000852514			0.0810016			0.335157				0.0550421			0.0890748			0.0680162
0.0452427			-0.0325552			-0.000390632				0.0741248			0.0318512			0.292536				0.00816755			0.0273406			0.191441
0.0684229			-0.029954			0.0123847				0.0456333			0.0120139			0.342512				-0.0137578			0.0935434			0.111106
0.0456214			0.106242			0.0237235				0.0276252			0.154765			0.123824				0.0613379			0.311501			0.0893908
0.0513401			-0.116722			0.0669066				0.0260707			-0.609219			0.221627				0.0283451			0.0411234			0.0592819
0.0504391			-0.00107116			0.0103687				0.0110133			0.475237			0.163179				0.0601997			0.0525346			0.0718295
0.0574148			-0.0546083			0.0353179				-0.0660363			0.186338			0.114962				-0.00134864			0.109821			0.0931528
0.0532804			0.214571			0.165877				-0.0220365			0.328937			0.165003				-0.000596451			0.137049			-0.0257745
0.039771			0.171671			0.00968254				0.0540438			0.0437229			0.187883				0.0791429			0.169386			0.303889
0.0701438			0.0145536			0.0963577				0.074107			0.0871675			0.159265				0.0384733			0.0277858			0.115012
0.0491695			-0.0152088			0.0527043				-0.0240888			0.0385822			0.249111				0.0408591			0.0869288			0.108172
0.0415063			-0.0797045			0.119154				0.0378102			0.0163416			0.265337				0.0279366			-0.0172181			0.139971
0.0416552			0.0502166			0.0384463				-0.0321946			-0.15145			-0.0118636				0.0358078			-0.0999786			0.122133
0.0521166			0.0507777			0.222978				0.0484227			0.0541942			0.239679				0.021493			0.101505			0.0264324
0.0434332			0.019304			0.415369				-0.017846			-0.0099874			0.557763				0.0711336			0.0383015			0.0865388
0.0426865			0.0269642			0.147262				0.0590186			0.0345981			0.272048				0.0565427			0.109124			-0.0480995
0.0424158			0.125451			0.0342449				0.00315438			0.0534828			0.568567				-0.0190985			0.0626831			0.165694
0.0432459			0.10843			0.197763				0.104546			0.0777528			0.472243				0.0529588			-0.0426784			0.0380687
0.02548			-0.00156108			0.074447				0.0891753			-0.124953			0.400546				0.0600156			0.0707574			-0.000305149
0.0456067			0.115668			0.389237				0.00554251			-0.161406			0.18264				0.0727105			0.0711534			0.187593
0.0410341			0.0890293			0.92126				0.0474821			0.0382987			0.475189				0.0783153			0.179954			-0.175739
0.0354295			0.0164389			0.152237				0.0017411			-0.0579974			0.379873				0.00886467			0.0651837			0.269706
0.0404145			0.105066			0.151143				0.0307833			0.00618588			0.391095				0.0337395			0.142204			0.225195
0.0722727			0.0250027			0.116906				-0.0308119			0.0973315			0.307666				0.0536488			0.0466372			0.0944524
0.0272307			0.0731909			0.078351				0.0179813			0.0284194			0.444375				0.050639			0.161454			0.185131
0.0674542			0.0814102			-0.269078				0.0527058			0.106045			0.431135				-0.0373607			0.0928623			0.0402839
0.0328331			0.0670333			0.0559741				0.0587534			0.104899			0.548848				0.039881			-0.00469573			0.0690065
0.0270672			0.0577673			0.188805				0.161023			0.0617918			0.524602				0.0246588			-0.0106137			0.121425
0.038296			0.0677843			0.0171712				0.0500574			0.00921556			0.474769				0.0289047			0.0627564			0.0444824
0.0504652			0.138632			0.168727				0.0438033			0.0639467			0.571741				0.0360784			0.0654268			0.0960995
0.0319283			0.0887781			0.0773407				0.0508862			-0.00152756			0.323232				-0.00984501			0.110316			0.0364858
0.044324			-0.0132132			0.0491839				-0.00574012			-0.0127169			0.493231				0.0129144			0.070163			0.0318023
0.0430531			0.0502192			0.0899276				-0.029896			-0.0193958			0.430568				0.00990918			0.103548			0.0567177
0.046598			-0.0102554			-0.0466361				0.00878089			0.112883			0.514932				0.0138243			0.00659025			0.210081
0.0481814			-0.0103364			0.0704331				0.0657859			-0.0600251			0.296324				0.00210291			0.0502694			0.062094
0.0493961			0.0502203			0.595911				0.13091			0.0710236			0.384466				0.036207			0.120628			0.151325
0.0288352			0.023344			-0.00215517				0.0198746			0.157696			0.51088				0.0265637			-0.124049			0.092121
0.0182498			0.0471883			-0.0225005				0.11387			0.0294988			0.410918				0.0034906			0.0509987			-0.0397754
0.018347			-0.0602278			0.0724557				0.0189379			0.048337			0.387664				0.00903368			0.167011			0.0794396
0.0199831			0.0469441			0.141366				0.0191249			0.091312			0.40649				-0.00107595			0.130014			0.135401
0.0183741			0.0117123			0.0287942				0.0380057			0.032068			0.498243				0.0146658			0.269119			0.238016
0.0300166			0.0147047			0.0601707				0.0294577			0.0718207			0.364195				0.0492011			0.0939015			-0.00113001
0.034732			-0.0302648			0.0227359				0.0125496			0.0381497			0.435569				0.0289114			0.140374			-0.0629569
0.0235739			-0.00408459			0.0443214				0.0486658			0.0355603			0.367322				0.00651907			0.0117542			0.119968
0.0205361			0.0409582			0.0185071				0.0905798			0.116858			0.337445				0.00183313			0.0910582			-0.0351546
0.02875			-0.017674			0.0396905				0.00776997			0.0986266			0.3775				0.00647643			0.135476			0.0369859
0.0315318			0.0736493			0.0683625				-0.0172605			0.14942			0.453175				0.0131792			0.258216			0.0579516
0.0192297			-0.00794752			0.028831				0.00900224			0.125422			0.428095				-0.0133004			0.0463203			0.0531009
0.0362287			-0.0125364			0.178796				0.0275042			0.094144			0.392739				0.0169441			-0.00762834			0.191431
0.0367574			0.0418079			-0.0865599				0.0254981			0.0467378			0.473447				0.0321476			0.136542			0.106709
0.0223526			0.0611145			-0.0287509				0.0577574			0.0887792			0.389301				0.0237132			0.124089			0.0360493
0.0365317			0.0122956			0.00896314				0.012278			0.0418018			0.460179				0.0809255			0.0191239			0.0670719
0.0341679			0.0473048			0.0567594				0.121278			0.130582			0.408369				0.00216047			0.195286			0.206099
0.0122175			0.0863248			0.0923734				0.00994638			-0.00707334			0.43468				0.0263028			0.0755769			0.0997006
0.0550143			0.00568442			0.0538969				-0.0206637			0.077496			0.334416				-0.0149242			0.112674			-0.0243439
0.0426872			0.0716732			-0.0429586				0.119292			-0.00093396			0.176199				0.0505776			0.214404			0.0147736
0.0400646			0.0495357			0.103371				0.00201185			0.124829			0.232357				0.0188509			0.163728			-0.0124806
0.0442485			0.0517743			0.158422				-0.117099			-0.0772695			0.042644				0.00763846			0.181855			0.0566675
0.0387474			-0.0398391			0.0293548				0.0845582			-0.0128534			0.504909				-0.00245749			0.0532569			0.172947
0.0383716			-0.0201256			0.00687037				0.0455021			0.0887658			0.470852				-0.0186469			0.036019			0.0682077
0.0480569			-0.0199965			-0.122491				0.00633049			0.00564867			0.438626				0.0894381			0.12323			-0.113923
0.0316582			0.040855			0.120539				0.126579			0.138729			0.61592				0.0476738			0.103377			0.0883399
0.0322864			0.00407093			0.0945668				0.0100315			-0.0272593			0.506593				0.00800466			0.117927			-0.125362
0.0307899			0.11956			0.146415				0.0155764			0.0918076			0.537509				0.0193292			0.033261			0.0812994
0.0361292			0.0391559			0.0284853				0.0471737			0.0324561			0.35605				0.0160777			0.0145885			0.154156
0.0575408			0.0368131			0.190679				-0.0155759			0.0607752			0.438386				0.0278125			0.148569			0.0799415
0.00622696			-0.0182985			0.00702358				-0.0436506			-0.0957932			0.300732				0.0489263			0.172146			0.136852
0.0367454			0.02018			0.0215458				0.0594212			0.0566832			0.348088				0.0301511			0.567857			-0.0490277
0.0456305			-0.00357358			0.00433946				0.0841263			-0.000329372			0.348323				0.0439774			-0.0252919			0.191201
0.0370527			-0.0146469			0.0423371				0.0616401			-0.0621925			0.506152				0.047847			0.147231			-0.107183
0.0531633			0.0838723			0.0107179				0.0797156			0.0868363			0.135251				0.0163444			0.240228			0.323664
0.0273888			-0.0384057			0.104691				0.0571129			-0.0459206			0.469589				0.00857681			0.157549			0.122489
0.0337935			0.0274242			0.0894963				0.0442731			-0.0712883			0.371133				-0.00449208			0.145365			0.0186571
-0.0148028			0.0966442			0.0558094				-0.0273595			0.16616			0.479304				0.0352722			0.118437			0.0591991
0.0686036			0.0410307			0.0916391				0.0780402			0.140166			0.528566				0.0382986			0.172159			0.0818645
0.0769712			0.034028			-0.0746671				-0.00425869			0.0596212			0.379997				0.015534			0.0580271			0.147095
0.00977276			0.0152429			0.148575				0.037282			-0.0151879			0.544879				0.0504576			0.168188			0.230407
0.023079			0.0324532			0.131285				0.013284			0.140824			0.365596				0.00967238			0.179213			0.150861
0.00607454			0.0551794			0.00746135				0.000135803			0.00871749			0.572003				0.00448774			-0.0238525			-0.0891561
-0.0375912			0.0152797			0.0933165				0.015831			0.0510373			0.454675				0.0463013			0.164606			-0.0567481
0.0399113			0.0613896			0.194152				0.00147554			0.122972			0.507813				-0.00663234			0.0545957			0.108057
-0.0012129			0.0573095			0.161172				0.0201836			0.0218123			0.544218				0.0525636			0.020744			-0.0265728
-0.0295302			0.0456655			0.0888688				0.0224134			-0.219262			0.57942				0.0332322			0.147127			0.467507
0.0289401			0.0124418			-0.0595803				0.03255			-0.00198314			0.427121				0.0232046			0.100899			0.132646
0.0189995			0.056249			-0.00223188				0.0391419			-0.0196119			0.23805				0.0284206			0.114521			0.251936
-0.00068023			0.00086104			0.0953839				0.075211			0.0381558			0.351257				0.0322605			0.0812322			0.0616856
0.0602292			0.000512502			0.053076				0.0252336			-0.0288902			0.679936				-0.0101531			0.00268854			0.121561
0.017195			0.0321971			-0.0922976				0.0348155			0.101501			0.551537				-0.0135328			0.129182			0.0478102
0.0381491			-0.0121872			-0.0569807				0.0267669			0.0350751			0.641751				-0.0227879			0.177311			-0.0795878
0.0625162			0.017788			0.0455099				0.0750498			-0.0027968			0.525047				0.0659263			0.0765947			0.132326
0.0603636			0.0371342			0.00212957				0.0487816			0.104568			0.583392				0.0650752			0.0777074			0.168747
0.0708803			-0.00138511			0.0132694				-0.0201207			-0.233397			0.743196				0.0502812			-0.0770975			0.148803
0.0376661			0.0145918			-0.0214745				0.0269772			-0.256019			0.612259				0.000545515			-0.0363547			-0.0461344
0.0472003			0.0065567			0.0968174				0.0184971			-0.0642023			0.590735				-0.00104309			0.117986			0.0944377
0.00862686			0.0589483			-0.038253				-0.0067753			0.0175276			0.382591				0.0421466			0.0369242			0.177876
-0.00487063			0.0444889			-0.0187383				0.0640199			0.0544369			0.495112				0.142685			0.0887402			-0.0420626
0.0511148			0.0513518			0.100928				0.132261			0.0479482			0.624187				0.078029			0.073111			0.0359835
0.0295077			0.0508261			0.276226				0.0464151			0.0736411			0.475667				0.0765443			0.184339			0.0110757
0.0638662			0.06269			0.130127				0.0546145			-0.1031			0.521299				0.04938			0.154801			0.0379037
-0.0109433			-0.0182728			0.0761083				-0.0564803			0.104329			0.503122				0.0737959			0.105484			0.122468
0.0125481			0.04247			0.116501				0.0573112			-0.0551001			0.430023				0.0114161			0.187533			0.0853323
0.00479185			0.0212306			-0.0832518				0.0376353			-0.245836			0.584345				0.101048			-0.0220761			-0.0103429
0.0392349			-0.0116383			0.066808				-0.000783399			0.0472366			0.478082				0.117943			0.122131			0.224473
0.0071559			-0.0497767			0.100013				0.0734572			0.0489785			0.50127				0.035365			0.0222402			0.0824209
-0.0367826			0.103143			0.105102				0.0141506			0.063372			0.610488				0.00997712			0.142306			0.0999282
0.0256459			0.0168234			0.0273921				-0.00937181			-0.0482769			0.582164				0.043579			0.0834436			0.200211
-0.0173959			0.0539729			0.0171249				0.0285587			0.143678			0.690752				0.147641			0.145846			0.155577
0.0132383			0.0701949			0.0623463				0.0272506			0.118681			0.51335				0.040932			0.218284			0.0120545
0.0660022			0.110397			0.0719699				-0.000811092			0.0116945			0.488119				0.0148061			0.0843689			0.0920328
-0.0357922			0.00646701			0.14085				-0.00270011			-0.190065			0.449168				0.0385412			0.15495			0.0770239
0.00705784			0.0645457			0.232571				0.0250998			0.117668			0.526417				0.0588517			0.226218			0.0149201
0.0270161			0.0340744			0.130889				0.0301499			0.0114107			0.569236				0.119134			-0.00406964			-0.162515
0.0727429			-0.0356535			-0.00125584				0.0106078			0.0427738			0.538471				0.0194589			0.124493			0.136141
0.0119617			0.00398684			0.0721205				0.0386174			0.0669985			0.464736				0.0636305			0.0825421			-0.100366
0.0310033			-0.0413546			0.326084				0.0070465			0.0984768			0.53069				0.177971			0.087196			0.0933179
-0.01619			0.00279233			0.133496				0.0315713			-0.302914			0.650351				0.145418			0.179275			-0.179985
-0.056837			0.0837266			0.0855323				0.00486175			0.0998623			0.496591				0.0708964			0.0675734			0.156828
0.00149481			0.00541809			0.0393297				-0.0415286			0.0483748			0.215405				0.138189			0.157529			-0.0564262
0.0542537			0.0481274			0.0469296				-0.00359407			-0.108535			-0.204685				0.032583			0.0637541			0.0614955
0.0310055			0.0318158			0.0430943				-0.0117195			0.116849			0.39087				0.0832568			0.14678			-0.18296
0.0718633			0.0770168			0.0662178				0.0144116			-0.0710126			0.621055				0.102578			0.095452			-0.149127
0.0354191			-0.0093442			0.0232433				-0.0311511			0.0245426			0.565007				0.0894367			0.0658835			0.14281
0.053909			0.0164348			0.167987				0.0215412			0.112347			0.570311				0.022538			0.159193			0.178467
0.0207205			0.0340383			0.0585573				-0.0219055			0.0595235			0.46315				0.0247477			0.0251178			-0.0914089
-0.0496794			0.116143			-0.0414939				0.0215111			0.0228404			0.598562				0.067297			0.00373582			0.023568
0.0154241			0.0697516			-0.0293687				0.0742958			0.00107525			0.450038				0.0481283			0.143142			0.0318134
0.0427468			0.0556082			-0.00552876				-0.0111817			-0.011734			0.629138				0.107959			0.0787072			-0.0165532
0.0296236			0.0580545			-0.0288556				0.0244382			0.0899208			0.447613				0.153534			0.124423			0.037438
0.01512			0.0181238			0.0198459				0.0175961			0.0513341			0.389424				0.0412969			0.0949602			-0.0173714
0.0366486			0.0288514			0.0724151				-0.026431			0.00832103			0.260593				0.0777776			0.132408			0.00659008
-0.0302283			-0.00940621			0.100921				0.0539065			0.0113301			0.342671				0.119508			0.0642235			0.00010526
0.0125976			-0.0142753			0.0154424				-0.0402428			-0.0209718			0.376593				0.0941169			0.0618156			0.0338549
0.0400673			0.0270692			0.0772103				0.0129263			-0.0375493			0.411864				0.027802			0.326334			-0.0555845
0.0407523			-0.000337381			-0.0272726				-0.0120718			-0.0699975			0.585618				-0.0257002			0.0846641			-0.000767359
0.0316798			0.0267662			0.0986545				-0.0136533			-0.0984412			0.595354				-0.0351579			0.0908328			-0.0272943
-0.0591883			-0.0166891			0.013049				0.0208094			0.174151			0.652747				-0.00389103			0.325734			0.0400231
0.00812318			0.0626436			-0.027076				0.0315655			-0.023672			0.725578				-0.018249			0.0790799			0.0301557
-0.022182			-0.0240434			0.0350642				-0.0134363			0.109776			0.659083				0.0140287			0.0987588			0.0160536
-0.0251286			-0.093901			-0.041122				0.0551857			0.0473543			0.581628				0.0599438			0.0745198			0.0087298
0.0467416			0.0492253			0.0174241				0.0128106			0.0998653			0.590048				-0.00162544			0.0761734			0.0119309
0.0969648			0.0327601			0.18972				0.00479291			0.115784			0.515488				-0.0157905			0.0780516			0.139031
0.00310218			0.0454831			0.104132				-0.00537702			-0.031664			0.724521				-0.00546462			0.25662			0.0620321
0.0992605			0.0652229			-0.011411				-0.0120626			0.0115424			0.716726				0.0498583			0.134539			0.0862646
0.0244746			0.0887255			0.108272				0.0167514			0.118512			0.64025				0.0213839			0.0908877			0.00469557
0.00455465			-0.0029424			0.0507135				0.0797308			0.00338932			0.441682				-0.00260762			0.116629			0.115128
0.0562936			0.0694597			0.0702165				-0.132411			0.113119			0.550536				0.0136288			0.132477			0.0157556
0.0240025			0.0313417			0.0778826				-0.0746427			0.0833424			0.455234				0.0178363			0.0122715			0.0408556
0.0412477			0.0260635			0.110071				-0.0183243			-0.091996			0.590046				0.00125961			0.10866			0.0406222
0.0557017			0.0638708			0.174361				0.0763795			-0.066361			0.697104				-0.0197472			0.0435921			0.0480207
0.0238795			0.0162946			0.119473				0.035634			0.103722			0.624007				-0.0255596			0.133394			-0.014566
0.0427582			0.0119371			0.0815243				0.0430886			-0.0475656			0.264264				0.0284413			0.156315			0.0436504
0.0421808			0.0359116			0.0829116				0.0549704			0.169111			0.504566				0.0549639			0.101802			-0.00930835
0.0375246			0.0221246			0.0807819				0.019276			0.0229885			0.606109				0.0459604			0.105949			-0.0105848
0.0538686			0.0278229			-0.0144042				-0.103087			-0.00351463			0.307151				0.0734741			0.25764			-0.0975129
-0.00150689			0.053283			0.00826405				0.0277623			-0.0820549			0.426212				0.0235285			0.167379			0.0095339
0.0153411			0.0484514			0.121653				0.00111624			0.0296269			0.609109				0.0390763			0.0719639			-0.0349764
0.00677838			0.0645285			0.133249				-0.0218217			0.0684762			0.555839				0.0641377			0.143316			0.000326517
0.034971			0.0458966			0.0777442				0.0237352			0.105862			0.471311				0.0599248			0.0922402			0.0458644
0.00145514			0.0589702			0.0688556				-0.0379031			0.124133			0.361925				0.0118986			0.12917			0.0129631
0.0523611			0.0436888			0.212461				0.0707111			0.12443			0.584144				0.0277022			0.221027			0.033409
-0.024219			0.0752379			0.0320597				0.0137944			0.121001			0.727069				-0.0255114			0.205916			-0.00750006
-0.01538			0.0659678			-0.0367961				0.0788078			0.070605			0.399542				0.00995845			0.142998			-0.00141536
0.0354222			0.0487095			0.0877562				0.0549514			-0.016943			0.255156				0.0352763			0.101696			0.00698936
0.0481745			0.00811458			0.0403522				-0.104557			0.0778752			0.611653				0.00580448			0.0756464			0.00513909
0.0342486			0.0409895			-0.00641056				0.0806664			-0.12238			0.718008				0.0262721			0.159522			0.000160263
0.0681908			0.0125238			0.0559684				-0.0109342			0.00997754			0.376051				0.0558417			0.100723			0.00487726
0.00724613			0.0405015			0.149377				0.0430647			0.105456			0.624779				-0.0306032			0.0952645			-0.019708
-0.0194319			0.0694745			0.0569319				0.0242149			0.0450582			0.514519				0.0338662			0.150712			-0.0408251
0.0170131			0.086515			0.112869				0.0924513			0.14295			0.581001				-0.0179692			0.0430361			0.00815341
-0.0229984			0.0460777			0.0909674				0.00306693			0.201402			0.699483				0.0142701			0.157888			0.0299418
0.0490195			0.0820955			-0.000673486				-0.111193			0.1073			0.857489				0.00395735			0.061429			0.031809
-0.0057798			0.0530558			0.0489939				-0.0571167			0.0214645			0.701852				0.0160362			0.173898			-0.0101855
-0.0275835			0.0594579			-0.0124676				0.0485396			0.048124			0.719448				0.0372573			0.179441			0.0179534
0.0441516			0.00899131			0.0900755				0.205251			0.05462			0.624204				0.00428723			0.105074			0.00473908
0.036494			0.0408746			0.079994				-0.102321			-0.0275539			0.509947				0.0189201			-0.0230458			0.00751286
0.038912			0.123897			0.0660337				-0.0305601			0.0332535			0.859904				0.0525917			0.143134			-0.0117786
0.058177			0.0746917			-0.0726702				0.00823347			0.077589			0.554527				0.0188713			0.0665821			-0.0069621
0.0402164			0.1312			0.101661				-0.0406701			0.1674			0.504315				0.00342476			0.102028			-0.0347318
0.00248059			0.0284994			0.125242				0.000684327			0.0182554			0.579081				-0.00757954			0.203142			-0.00684984
0.0563636			0.154797			0.0234698				0.0519854			0.059245			0.686415				-0.0120453			0.081221			-0.00525732
-0.0196053			0.0355667			0.121495				0.0395347			0.00209793			0.673701				0.0109514			0.0920631			-0.031474
-0.0085549			0.117177			0.081537				0.121612			0.0116642			0.107613				0.0100403			0.142685			0.00834994
-0.0321359			0.0159533			-0.0248156				0.166887			0.0470963			0.630356				0.0174029			0.240001			0.0142893
0.029606			0.0397395			0.0540576				0.0455904			-0.0466602			0.610132				0.010828			0.0587574			0.0127213
0.111472			-0.0755179			0.0455428				0.0264003			0.0652615			0.540218				-0.0381196			-0.0567141			0.0547149
-0.000449623			0.0969663			0.0689909				-0.0154448			0.00753745			0.538068				-0.0354014			-0.197874			0.024724
-0.00275656			0.0454281			-0.0512005				0.053053			0.0720163			0.602096				0.00326963			0.101574			0.012723
0.0712065			0.195541			0.0867251				-0.0333089			0.112399			0.719744				0.0342837			-0.0548488			0.0526291
0.023492			0.0242466			-0.0376354				-0.0322271			0.0329836			0.445635				0.110091			-0.145035			0.00678683
-0.0136426			0.0515341			0.0486069				0.0689434			0.0663306			0.627614				0.0204676			0.0492795			-0.00505765
0.0221178			0.157548			0.0560071				0.0640366			-0.0478907			0.535918				0.0422332			0.248993			0.0233795
0.0409861			0.0470409			0.144202				-0.0246255			0.045102			0.72833				0.0429202			0.0275994			0.0210707
0.0721935			0.0535503			-0.000586198				-0.0544256			0.0816818			0.490518				-0.0140628			0.119833			-0.0440652
0.0143543			0.000995635			0.22611				0.0599842			0.0328547			0.527903				0.0565668			0.0747063			0.0231445
0.0179772			0.0223148			0.0906689				0.0795742			0.00537118			0.749314				-0.0174396			0.266371			0.0526024
0.0377396			0.108914			0.123273				-0.018949			-0.00782596			0.277982				0.0124878			0.133336			-0.0205019
-0.0138829			0.138195			0.0836219				0.0399862			0.0229863			0.441626				0.017594			0.206398			0.0421924
-0.061914			0.10592			0.180703				0.551206			0.0674564			0.460795				-0.0116551			0.211283			0.0838342
0.121941			0.0864118			-0.0277063				0.139374			-0.101805			0.590614				0.00606108			0.0951134			0.0646957
0.0562013			0.125298			0.10875				0.00620888			0.0748014			0.486701				-0.0133981			0.123748			0.0328735
0.00843691			0.103052			0.0608643				0.0207121			-0.00682463			0.216955				0.0445204			0.218431			0.00032017
0.0119677			0.126232			0.0772864				0.135527			0.0272434			0.584343				0.020492			0.188007			-0.00755832
0.0755721			0.0898748			0.0330242				0.0327974			0.110854			0.336729				0.0192636			0.100654			-0.0361265
-0.055081			0.0108171			0.158451				0.138911			0.0173399			0.558899				-0.037751			0.061804			0.0320407
-0.00511964			0.0235552			0.00723532				0.000225113			0.0179134			0.567389				-0.0178186			0.00180135			0.0819125
0.0106177			0.0557752			0.055834				0.0588141			0.0088073			0.44657				0.0677802			0.0513985			0.0441281
-0.000760024			0.0135744			0.0834237				0.0886105			0.084009			0.41709				0.00933138			0.115714			0.022001
0.000924271			0.0317614			0.0994753				0.0227051			0.07275			0.495697				0.00392851			0.0380129			0.0284799
0.0153864			0.174993			-0.0178859				0.0885228			-0.00944772			0.356912				0.011882			0.154515			0.0817353
-0.00867276			0.137609			0.0401985				0.0672382			0.0821626			0.639512				-0.00439146			-0.0157228			0.00624955
0.00256085			0.118776			0.450544				0.0861083			0.137501			0.37289				0.0121872			0.00564031			-0.0258532
-0.0345681			0.0568762			0.263053				0.0808847			0.0964627			0.518952				0.00339043			0.0403556			-0.0254235
0.0117189			0.109694			0.0744971				0.0314227			-0.0226436			0.53074				-0.0148978			0.0611323			0.0346756
0.072895			-0.0296663			0.136901				0.0789077			0.047153			0.53261				0.0116699			0.0342084			0.0012988
0.102518			0.0708767			0.039565				0.0826897			-0.012065			0.615401				0.0504023			0.194366			0.00439816
0.0246029			0.0351869			0.120873				0.0347029			0.0340979			0.460685				0.0306464			0.0222155			-0.0131199
-0.00977712			0.170085			0.10588				0.168798			0.0276057			0.432613				0.0132958			-0.0639775			-0.00834085
0.0173175			0.15195			0.0524141				-0.0183582			-0.000599077			0.374794				0.0103416			-0.036927			-0.0294143
-0.0113025			0.0950333			0.0297942				0.155787			0.0687277			0.400407				0.011388			0.0348144			0.0530347
0.078977			0.1224			0.144003				-0.0689439			0.0261146			0.51309				0.0798432			-0.00382511			-0.00323453
0.0112589			-0.0502957			0.150642				0.0263337			-0.00589897			0.520043				-0.103132			0.149665			0.0275709
-0.0294886			0.0481585			0.0944425				0.0689352			0.0339729			0.463716				-0.00102052			0.0671985			0.016599
-0.0139674			0.0358851			0.140635				-0.0669691			0.00269157			0.491346				0.127142			0.0908766			0.0538655
-0.0468359			-0.00812308			0.0845444				0.0805542			-0.00557464			0.340308				-0.0188408			0.366478			0.0113856
0.0323015			-0.00340465			0.107113				-0.0712949			0.0842797			0.520046				-0.0110028			0.0473205			0.040345
0.0470186			0.0592848			0.124851				0.0183953			0.0672099			0.398831				0.0340854			0.138647			-0.00106242
0.0470657			0.0968118			0.0742584				0.0016685			-0.0527975			0.51488				0.0466541			0.0736534			0.0637764
0.0568987			0.0028219			0.00266465				0.0161018			0.0619246			0.368641				-0.0189789			-0.0446657			0.071266
0.0482058			0.0885549			0.125314				0.0408696			0.0686585			0.389579				0.0689863			-0.0104038			0.00779952
0.0180194			0.0228675			0.00101858				-0.0182676			0.0129037			0.320623				-0.0869539			0.148316			0.0246281
-0.0191721			-0.0147449			0.122118				0.0097828			0.00816594			0.495287				-0.0307523			0.161401			0.0162286
0.0374838			0.0223545			0.0328678				0.0773491			0.0246169			0.444759				0.0187853			-0.0605508			0.0602556
0.0382475			0.0457775			0.17977				-0.0149264			-0.0354107			0.485628				0.0490015			-0.0893319			0.0641018
0.0225631			0.0809401			0.146912				0.0909409			0.0153371			0.520413				-0.107833			0.0302783			0.0869987
0.0208414			0.0679304			0.0884875				0.0513029			0.0505597			0.155637				0.00428504			0.00623746			0.0295524
-0.0225491			0.0194224			0.0139768				0.0867436			0.029361			0.399032				0.0484178			-0.0708006			-0.0287005
0.0395095			0.0411047			0.0506348				0.103654			0.0758626			0.491279				-0.0389714			-0.0455705			0.0084026
0.0477061			0.0279303			0.0687666				0.0195044			0.128942			0.394243				-0.0263387			-0.0123331			-0.0122643
-0.00203206			0.0250801			-0.00477006				0.0365973			0.0794699			0.618488				0.158886			0.119869			0.0430234
0.0508363			0.072627			0.0345331				0.0477857			0.132079			0.588917				0.0631947			-0.026656			0.030923
0.0100044			0.0212172			0.0404891				0.138028			0.0936272			0.249652				0.0256633			0.14927			0.0167972
0.0509715			-0.00155464			0.0399219				0.041062			0.0333412			0.346561				0.0240479			0.124254			0.0340574
0.0256989			-0.0289703			0.0443862				0.0259902			0.0594328			0.612676				0.0233053			-0.0437452			0.0374371
0.0455787			0.138125			0.0356202				0.0773599			0.0245767			0.696573				-0.0474179			0.0812042			0.022746
0.00577499			0.0360796			0.0163203				-0.0570442			0.0206498			0.589607				0.0418768			0.105362			0.025683
0.0144571			0.0519478			0.0223758				-0.0293851			-0.0557541			0.53022				0.125922			-0.00210768			-0.0465952
0.0058901			-0.00546819			0.0562411				0.0336457			0.146644			0.338692				0.0488644			-0.001192			0.0414194
0.00461463			0.0445732			0.051376				0.087276			0.0607456			0.470806				0.0732407			0.0456895			0.000700411
0.0733265			0.0799004			0.0246418				-0.0367998			0.0155119			0.451194				-0.0515643			0.0168108			0.00813851
0.0430131			-0.00442779			0.0108743				0.0137328			-0.015381			0.377904				0.0772496			0.0799903			0.0335561
0.0415053			0.0067856			0.0420159				0.0796576			0.0696392			0.41135				0.0250071			0.0276688			0.00449891
0.0215272			-0.0110878			0.0760131				0.0209576			0.0427605			0.522637				-0.00349218			0.213259			0.0439246
0.0371752			0.00343369			0.0261736				0.0524481			0.0288094			0.248047				-0.0321181			0.152762			0.0152419
0.048173			0.0312333			0.0447161				-0.046055			0.0691953			0.471159				0.0339244			0.0105004			0.0354183
0.0393264			0.000893369			0.0406459				-0.0187393			0.0637309			0.605594				0.0029885			0.0365738			0.0102543
0.0396179			0.0215463			0.0374975				0.0918199			-0.136441			0.523489				0.0665356			0.0404496			0.0472644
0.0558193			-0.0135169			0.0422445				0.0127841			-0.050694			0.3897				0.0642981			-0.0855903			0.0314505
0.0434975			0.048384			0.00873067				0.0442873			0.00685933			0.523525				0.0161287			0.0420661			0.0646367
0.0651313			-0.0968214			0.0473223				0.0234061			-0.0141746			0.458292				-0.000886669			0.00557804			0.0292996
0.027038			-0.0228267			0.0242186				0.0653825			0.0656643			0.457669				0.0304099			0.218362			0.0493818
0.0081372			0.0289542			0.0308836				0.0188116			0.0311423			0.498068				0.183333			0.0474837			0.0237501
-0.0587606			-0.0275865			0.0328488				0.0275671			0.0538902			0.450492				0.109257			0.0252052			-0.0202651
0.0454084			0.0286289			0.0502269				0.0872016			0.0500871			0.00785871				-0.0129033			0.0972867			0.0439624
-0.0228886			0.0431486			0.0584109				-0.0291659			0.0293498			0.385462				0.130203			0.026164			0.0239903
0.0382395			0.0353695			0.021495				0.110693			0.043852			0.323678				0.0054511			-0.0219942			0.0359095
0.00613898			0.014234			0.0460453				0.0142815			0.0053814			0.509171				-0.0030649			0.0279069			0.035116
-0.0246196			0.109442			0.029963				-0.00266569			0.0756411			0.596869				0.136808			-0.11641			0.0188153
0.0373259			0.0521013			0.0338532				0.00401191			-0.0836705			0.341841				0.0810029			-0.0176598			0.0348839
0.109669			0.0708213			0.043233				0.059459			0.106873			0.502097				-0.0382416			0.00211035			0.0206631
0.0273936			-0.0240551			-0.00748696				0.0325195			0.0363677			0.41058				0.0192207			0.0861669			0.0573584
-0.0171976			0.0882128			0.0100859				0.0689822			0.123547			0.117905				-0.00366269			-0.00501435			0.00646513
-0.0138184			0.0630739			0.0152307				0.0586229			0.0567406			0.177773				0.0512647			-0.0895238			0.0334954
0.0768801			0.0294364			0.0151573				-0.0221305			0.112983			0.195101				0.0921262			0.358318			0.035847
-0.0232426			0.0535834			0.0196632				0.0630954			0.0227124			0.0436515				0.14914			-0.151196			0.0779317
-0.0313833			0.046364			0.0232179				0.0228044			-0.0180807			0.0190883				0.0912556			-0.0887283			0.0239836
0.00998995			-0.0129702			0.0482349				0.075635			0.0638621			0.0945859				-0.0563553			0.0127547			0.10343
0.0403319			0.12415			0.0374673				0.0809073			0.0405789			0.0517707				0.127382			0.111892			0.0413089
0.00903315			0.0496748			-0.0181119				0.0272571			0.0543216			0.321358				0.0418291			0.0283718			-0.00835082
0.0263484			0.0314281			0.0119924				0.0258713			0.0216596			-0.0294144				0.0318551			-0.061054			0.028496
-0.0498618			0.0803498			0.044447				0.0361358			0.108429			0.00290288				-0.0142423			0.139077			0.0379464
-0.0167817			0.032435			0.0367946				-0.00529779			-0.0222746			0.0791898				0.0638771			0.0520094			0.015024
-0.0917157			0.00148544			0.0340273				0.0655905			-0.0691102			0.118739				-0.0945067			0.0191845			-0.00871048
0.0606824			0.0414445			0.0631314				0.0587253			0.0775705			0.19806				-0.0379603			0.0804011			-0.00388897
0.0245323			0.0550164			0.0400604				0.0875719			0.105064			-0.755209				0.0562442			0.0622558			0.0378484
0.00163735			-0.0475642			0.028775				-0.00929122			0.0226561			0.249883				-0.0111968			0.108408			0.0121527
-0.0262788			0.00630608			0.044479				0.0830922			0.0309644			0.209296				0.0249043			-0.0124644			0.0395949
-0.0102508			-0.0212976			0.0404309				0.00954631			0.12794			0.0447632				-0.00489751			0.1176			-0.0770429
-0.0181203			-0.0828172			0.0654157				0.0504491			0.122049			-0.108652				-0.0402244			0.0800114			0.00978377
0.0303106			0.124603			0.0354934				0.0454217			0.0278093			0.0913134				0.0597668			0.047156			0.0318807
-0.0501554			-0.00773408			0.0380187				0.0414425			0.038622			0.511025				0.0814216			0.0367639			0.0155523
0.00511203			0.00263936			0.0450628				0.112251			-0.0544107			0.470098				0.075088			-0.0556943			0.0143319
0.0073682			0.0493367			0.0332363				0.149372			0.0764712			0.433493				0.0192721			0.00211826			0.00827996
-0.0420284			-0.0355383			0.0308815				0.182151			0.0805091			0.485487				0.0681893			0.0706821			0.0375161
-0.0172169			0.0531668			0.0654572				0.09231			-0.00853392			0.463244				-0.0767713			0.0525992			-0.0144746
-0.00876101			0.0995801			0.0386425				-0.00988593			-0.164405			0.592622				-0.0226448			0.0554319			0.0151869
0.0386984			-0.00522617			0.0315571				0.0267778			-0.0737935			0.350543				-0.131443			0.0675			0.0114822
-0.043592			-0.00948504			0.0413266				0.153361			0.0598848			0.544109				-0.0290546			0.0825639			-0.00385092
0.0133122			0.0174096			0.0485057				-0.0555044			-0.00238467			0.577363				-4.02352e-05			0.0628122			0.00081646
0.0605813			0.0265339			0.0472765				0.0467428			0.0446672			0.551691				0.0499685			0.0511872			0.000338605
0.00150095			0.0707797			0.0487534				0.0305296			0.00357548			0.592296				0.0821958			0.075609			-0.00793403
0.0248658			-0.011492			0.0485104				-0.0176315			-0.0295024			0.418063				-0.0304679			0.0754644			0.0175805
-0.00226586			0.03365			0.0397455				0.0695305			0.0648433			0.569577				-0.0275664			0.0386272			-0.0112614
-0.0165715			0.0357824			0.0249543				-0.00419915			-0.0202783			0.506676				0.0646705			0.0650864			-0.0151766
0.0194427			0.0706809			0.0178092				0.0661784			-0.0143815			0.0524636				0.0439297			0.0720887			0.00714816
0.0279718			0.0262487			0.0250107				0.0473023			0.0631517			0.675053				0.0193223			0.0715478			-0.00338749
0.0373435			-0.000316975			0.0319234				-0.0458281			0.123178			0.578419				-0.0170625			0.0730903			0.030754
0.0739443			0.136986			0.0281081				0.0270116			0.053541			0.601801				-0.088994			0.0846922			-0.000467124
0.0741503			-0.0230631			0.0197569				0.0303249			0.129715			0.547091				-0.0277857			0.0720514			0.0478528
-0.0233953			0.0132673			0.0395781				-0.192097			0.0305809			0.550626				0.032712			0.070162			0.0095547
0.0642849			0.0437967			0.0321857				0.0110522			0.00268085			0.555105				0.024302			0.0674852			0.0358832
0.0819584			0.0761508			1.25687e-06				-0.143171			0.0311946			0.632287				0.0620307			0.0756625			0.0197104
0.0290186			0.00371335			0.0232225				-0.339506			-0.0528481			0.61278				-0.0557651			0.0688263			0.0408602
-0.154808			0.0632691			0.0108843				0.06744			0.00717703			0.636535				-0.0337867			0.0583575			0.0428083
-0.0293376			0.0945339			-0.00327372				0.0916155			-0.0200505			0.531112				0.00324223			0.0916524			0.0217065
0.0709903			-0.031748			0.0264433				0.0591087			0.0160478			0.491414				0.0308745			0.0478818			-0.00125649
0.0199676			0.0723613			0.0379482				0.0198097			0.0683174			0.642502				0.052618			0.0594671			0.00159913
-0.0370959			-0.0824183			-0.00157838				-0.00377948			-0.00446657			0.661185				0.0425412			0.0892027			-0.0416149
0.125197			0.0721191			0.0269185				0.124724			0.0697588			0.406995				0.0316921			0.0990509			0.0286672
0.0674318			0.0425425			0.0452665				-0.109242			-0.000946181			0.644648				-0.0252712			0.0603044			0.0354357
-0.0186503			0.0724919			0.0192118				0.0321481			0.0951335			0.638032				-0.0166884			0.0565036			0.032455
0.0832357			-0.01495			0.0447429				0.00844234			0.0364767			0.602101				0.0685933			0.0687652			0.0255837
0.0265957			-0.0209717			0.0535071				0.0415296			0.0282074			0.492202				0.144569			0.0789016			0.0240731
-0.0122438			0.0556515			0.0549116				0.120387			0.119473			0.340507				-0.0660534			0.0620816			-0.0327129
-0.00325033			0.0364087			0.0298353				0.0537899			0.0424146			0.507229				0.0145064			0.0858159			0.00420577
0.0684147			-0.0732843			0.0156246				-0.0524696			0.0160464			0.489898				0.0728938			0.0844205			0.0143974
0.04804			0.0224563			0.0421349				-0.00416329			0.0340131			0.612724				0.0751185			0.0907944			0.0168208
0.0822062			0.0697507			0.0276596				-0.0637159			-0.0020741			0.628154				0.0223569			0.0793149			0.039137
-0.0635062			0.033268			0.0538057				-0.00238648			-0.00134199			0.6064				0.0164957			0.0911632			0.0350163
0.0431962			-0.0133685			0.05927				0.119764			0.0059276			0.656683				-0.050904			0.077135			0.00194678
0.0645154			0.0890742			0.0268787				-0.153323			0.0511454			0.553469				0.0193158			0.0701079			-0.0383658
0.0755115			-0.0109707			0.0184503				0.137174			-0.0350135			0.487421				0.0219398			0.0763437			0.044463
0.0442183			0.107783			0.033542				0.162187			0.00887448			0.612748				0.0118462			0.0763767			-0.00964178
-0.0158569			0.0649253			0.0330111				0.0901389			0.0114428			0.624307				0.0590366			0.0539209			0.0658053
0.035256			0.0271226			-0.0139832				0.0826017			-0.0017084			0.578349				0.0553484			0.0393607			0.0105224
0.0390017			0.0129536			0.0492385				-0.0517923			0.0345257			0.539017				-0.0978621			0.068126			-0.00487755
-0.0104343			0.0189377			0.0470951				-0.0220662			0.0111227			0.601577				0.0328712			0.0576878			0.0101603
0.068205			0.092724			0.0622915				-0.0404007			-0.00234542			0.472545				-0.0732087			0.0697844			0.0322017
0.0477203			0.0423871			0.0332306				0.156182			0.0665903			0.684549				0.0387631			0.0898645			-0.00913641
0.0112614			0.0966623			0.0394353				-0.00568365			-0.0257314			0.685451				-0.0732358			0.0777833			0.0183626
-0.0113206			0.052245			0.0393502				-0.129712			-0.0531048			0.614244				0.0703898			0.086212			0.0330638
-0.0403892			-0.0629786			0.0598721				0.126657			0.03574			0.654828				-0.0067044			0.0630835			0.0715832
0.0184446			0.0353348			0.0111934				-0.147118			0.0866047			0.658886				0.0646297			0.0821174			0.00599715
-0.00389952			0.0142808			0.0210989				0.098415			0.0498518			0.615218				-0.0959278			0.0960228			0.0488842
0.061153			0.0878501			0.0151727				-0.0511383			0.048308			0.618451				0.00456778			0.0692153			0.0316178
0.0113684			0.0717653			0.0478234				0.0632008			0.0652054			0.591558				0.000469254			0.0885374			0.0413944
0.116609			0.150597			-0.0189527				0.0587962			-0.0352553			0.663135				0.0404438			0.0811893			0.0212723
0.0318261			-0.111602			0.0271867				-0.128578			-0.00862148			0.557248				-0.0373142			0.0827282			0.0295045
-0.0555202			0.101032			0.0498326				-0.0487987			0.0155004			0.636701				0.00166311			0.0853261			0.0163981
0.0211478			0.0469998			0.0375889				0.0980968			0.0293478			0.52428				-0.0206044			0.0859884			0.00489299
0.060706			-0.0703088			0.0173595				0.00373117			0.0254857			0.609073				0.0449125			0.0911472			0.0310684
0.0354225			-0.0481486			0.0285396				-0.0115832			-0.136875			0.659524				-0.0174054			0.0819941			-0.00623093
0.0890893			-0.0340283			0.0279888				0.0234301			0.0480659			0.579156				-0.0794935			0.09084			0.0138851
0.0293929			0.0907953			0.0403551				-0.119092			-0.10777			0.506809				-0.0874079			0.0926352			-0.0164147
-0.0306574			0.0313402			0.0415046				-0.0964053			0.130714			0.429274				-0.0571589			0.0758648			0.0150448
-0.0170998			0.0703145			0.0171179				-0.0321866			0.101424			0.359283				0.033773			0.0785834			-0.0143082
-0.106869			0.0832136			0.0522707				0.104594			-0.0896211			0.384193				-0.00328952			0.102878			-0.0070729
-0.00489103			-0.0950716			0.055405				-0.129408			-0.0107072			0.326946				-0.0111771			0.0722696			0.0361145
0.0193732			0.0468726			0.03625				0.0387349			0.0324824			0.358418				0.0230145			0.0659499			-0.00583453
0.0573645			0.0324468			0.0206075				4.22745e-05			0.0224759			0.368515				-0.00880776			0.0946035			0.0368162
0.00663617			0.0431314			0.0233897				-0.080112			0.0485355			0.371911				-0.0214983			0.0876044			0.0574846
0.0810439			0.0201844			0.040191				0.0458234			-0.0837425			0.346828				0.0145238			0.0460133			0.0134337
0.0173344			0.0469446			0.0446066				-0.0511122			-0.0153863			0.4178				-0.470194			0.0589851			0.0059776
-0.160184			0.0603115			0.0471037				0.0660329			0.0173546			0.38683				-0.126996			0.0589481			-0.0142588
-0.0367178			0.124765			0.0391511				-0.0141944			-0.0229311			0.268477				0.0345646			0.0659962			0.0205303
0.0334841			0.0432823			0.0154661				0.0607664			0.0317983			0.299284				0.00852475			0.0872433			0.0299243
-0.00112533			0.0362173			0.0733113				-0.0179551			0.114281			0.301249				0.117863			0.0759261			0.0418073
-0.0136089			0.0162569			0.0349026				0.855002			0.00220184			0.339045				-0.0330318			0.0766928			-0.00570877
-0.00746187			-0.00121672			0.0322971				-0.0659735			0.0629987			0.370597				0.0346905			0.0813434			0.00357251
0.0472358			-0.0108691			0.0223994				0.217013			-0.0263971			0.460062				0.0247671			0.0601285			0.0213881
-0.00692492			0.0926425			0.00771201				0.093263			-0.00181211			0.287779				-0.0114013			0.0350599			0.0528431
0.0794047			-0.0233757			0.0371293				-0.0038728			0.0853699			0.364306				0.0479463			0.0830286			0.0760013
0.0467045			0.0491942			0.0333361				-0.0440139			-0.0864349			0.498472				0.0951071			0.0708179			0.0574363
0.0452394			0.0100062			0.0219136				0.183453			0.117006			0.412742				0.0137019			0.0638071			0.0262143
-0.00656568			0.0647953			-0.0026833				0.759724			-0.00154828			0.287103				0.0189653			0.0781611			0.0662675
0.00123574			0.0174054			0.0183603				0.0524284			-0.0326149			0.457181				0.0419345			0.0697688			0.0310159
-0.0342433			0.00904152			0.0219044				-0.0418577			0.031874			0.488327				-0.202401			0.0669348			0.079808
0.00722655			0.0594932			0.0342338				0.0360845			0.0457272			0.448632				0.0926295			0.0667685			0.00555202
0.0336522			-0.0130246			0.0374602				0.00567411			0.00229199			0.444045				0.0768719			0.061908			0.0448861
0.0095018			0.0389778			-0.0322355				0.00529929			0.065022			0.405549				-0.0592274			0.0641413			0.000392069
0.0666099			-0.0811339			0.0142096				0.00471682			0.0465158			-0.0045378				-0.00638627			0.0447955			-0.00422408
0.0163624			0.0520153			0.00546246				-0.00547858			-0.0379684			0.430705				-0.0696441			0.0726572			0.0229309
0.0448105			0.00415818			0.0318805				-0.0318117			-0.0405805			0.470606				-0.0858866			0.0689669			0.0135679
0.0575577			-0.00879647			0.0120368				0.00664508			0.070317			0.389894				-0.331416			0.0857028			0.0173872
0.0432118			0.0211128			0.0316147				0.00411303			-0.0431678			0.33827				-0.00174126			0.100713			0.0728822
-0.0217267			0.0398174			0.0254358				0.00608025			0.0323107			0.419787				0.00187018			0.0965447			0.0133359
-0.00281083			-0.00648156			0.0207555				-0.0190526			0.0247404			0.330438				0.02747			0.0957978			-0.0198023
-0.0322156			0.0275183			0.0193515				-0.00694149			0.0325318			0.328105				0.0334985			0.09455			0.0323501
-0.0485226			0.00737201			0.00782979				-0.00711896			-0.0213047			0.461025				0.00908118			0.10136			0.036918
0.00903982			0.0709763			0.040725				-0.0389809			0.0314472			0.502727				0.0849068			0.0514776			0.000681048
0.0183899			0.0860444			-0.0177753				0.0411357			0.0584278			0.40474				-0.012135			0.088961			0.0256307
0.0377746			-0.00405664			-0.0174953				0.00604767			0.0461452			0.416805				0.00832687			0.0667876			0.026159
0.0313087			-0.0172794			0.0215027				-0.00664629			0.00791904			0.316581				-0.0117285			0.0980193			-0.00387832
-0.0131573			0.0157817			0.0130009				-0.000139357			0.0405127			0.468986				0.013341			0.0759547			0.0519177
0.0735688			0.0539487			0.0105735				-0.0191323			-0.0156991			0.363114				0.00393174			0.0662591			-0.0148686
-0.0107626			-0.00175228			0.0224475				0.0184918			-0.0319946			0.54394				0.00828896			0.0737552			0.0194378
-0.00565769			0.0371378			0.0198857				-0.0230256			0.0180825			0.258329				0.0585709			0.0710873			0.0478974
3.61983e-05			0.0176918			0.0390902				-0.0476805			0.0207415			0.325644				0.0665377			0.0826603			-0.00317114
-0.0885784			0.049405			0.0148799				0.0209279			0.0938144			0.441452				0.00290711			0.0545302			0.022524
-0.0195735			0.0660144			0.027905				-0.00375257			-0.012965			0.294666				0.024357			0.0629591			0.0046338
0.0135833			0.0672481			0.000612282				0.0177222			-0.00851115			0.429223				0.0239457			0.0712978			-0.0140167
-0.0604143			-0.0144584			-0.00211627				0.0356973			0.0298102			0.309852				0.0737905			0.0473891			0.0090435
0.0303276			0.032826			0.027369				0.00382515			0.0153039			0.302522				0.0383475			0.0498807			0.0108247
0.00813363			0.0174775			-0.00395552				0.0401486			0.0918115			0.274906				0.00125673			0.0913173			0.0413175
0.0779235			0.0579341			0.0402017				0.0467083			0.0365403			0.338036				-0.0196875			0.0609596			0.0164507
0.0370611			0.0218518			0.0004481				0.0149745			-0.00585486			0.343913				0.0649185			0.0693544			0.0379235
-0.00449771			0.074202			0.000829889				0.0450008			-0.00107598			0.338629				0.0152713			0.0327455			-0.0101374
0.109618			0.0271966			0.0201231				-0.102426			-0.0458754			0.389705				0.0317487			0.0726187			0.000149353
0.0659192			-0.0185537			0.0171512				-0.0101276			0.0556049			0.392569				-0.0596868			0.0790511			0.00658472
-0.0493567			0.0636147			0.00400319				-0.0102904			-0.00297898			0.305791				0.0170931			0.0841206			0.059592
-0.0310379			0.0130169			0.0133479				0.0242674			0.0801109			0.319349				0.0136121			0.0675106			0.0109012
0.0310498			0.114291			0.0496666				0.0234841			-0.00362307			0.384724				0.0116344			0.0638381			0.0190962
0.00848555			-0.0625846			0.036615				0.0594073			0.0638448			0.426948				-0.0218927			0.0704765			0.0665216
0.0841526			0.0780046			0.0242828				0.0262454			-0.0200393			0.42298				0.0109813			0.0535844			0.0303401
0.00625224			-0.0466961			0.011767				-0.0318142			0.00590386			0.381567				0.0119116			0.0571433			0.0278101
0.0302169			0.0591412			0.011012				0.000416556			0.0407521			0.454314				0.0595901			0.05964			0.0101268
0.0417481			-0.00643836			0.00794939				0.0722414			-0.0318058			0.298498				0.00772064			0.0708775			-0.00841427
0.0294769			0.0524237			-0.00739223				-0.144484			0.0890886			0.391097				-0.065724			0.0705847			-0.00249683
0.0505873			0.059836			-0.0209018				0.00884634			0.0701219			0.482924				0.0279889			0.0616833			0.0198649
0.034533			-0.0188106			0.05745				-0.00489109			0.0591372			0.458686				0.0775725			0.0811155			-0.0277305
0.0405532			0.0700159			0.0898841				0.0159544			0.0420469			0.448627				-0.0310601			0.0720973			0.0112609
0.0535673			0.0639602			0.174763				0.0672874			-0.0625299			0.232584				0.0905566			0.105404			0.0125226
0.0993546			-0.0610345			0.146257				-0.16463			0.0297112			0.443821				0.0737043			0.128136			0.0341106
-0.00250071			-0.0549175			-0.00650955				0.0179598			-0.0147837			0.370263				0.00142249			0.103093			0.0188126
-0.0025196			-0.0177355			0.0523462				-0.00359883			-0.0455214			0.413924				0.109272			0.0757631			0.0202661
0.0843249			-0.00844706			0.0139861				0.130538			-0.00293646			0.408019				-0.0103447			0.0958623			0.0215644
-0.00903599			0.0640347			0.0508255				0.159065			-0.0464184			0.362387				0.00621045			0.0857908			-0.0174948
0.0816607			-0.0502838			-0.0297616				0.0582863			0.0649732			0.420653				0.00501334			0.104655			0.0458396
0.0672918			-0.0492001			-0.00921466				0.0541499			-0.0168523			0.493486				-0.00829048			0.0839704			0.0270283
0.0570782			0.00947339			0.0382039				0.0722942			0.119988			0.522118				-0.0165325			0.0682995			0.0267322
0.00488144			0.107811			0.133682				0.0406631			0.00637107			0.266935				0.0317804			0.085946			0.0293708
0.035614			0.0202069			0.0504932				0.00224192			0.0753453			0.180783				0.0201636			0.118447			0.0261431
0.0533956			-0.0764157			0.0286314				0.00544725			-0.0389238			0.450699				0.0573908			0.0876639			0.0349649
-0.0250095			0.0284847			0.0478601				-0.00433849			-0.0437039			0.387765				0.0592721			0.076037			0.060354
0.0476439			0.0587061			-0.0302241				0.027455			-0.0436853			0.122811				0.0413114			0.110384			0.0362066
0.0457393			-0.0231733			0.0445306				0.00839797			-0.0168145			0.334043				0.0187416			0.0707403			-0.00589082
-0.0315285			0.0228617			0.0295195				0.0183481			-0.0452716			0.307314				0.0382271			0.0669016			0.0359594
0.0844204			0.00879759			0.0644026				-0.00190233			0.0699221			0.532224				-0.0180937			0.0491047			-0.0246558
0.0231141			-0.0373075			0.163273				0.0319572			-0.0349098			0.0630495				0.00553505			0.0462273			-0.0015366
0.0295987			0.0149485			-0.0582842				0.00346665			0.068702			0.0333882				-0.0261004			0.0546736			0.063946
0.0539724			-0.154672			-0.150314				-0.00458672			0.0156076			0.0288558				0.0330694			0.084236			-0.00862059
0.033959			0.0523677			0.517141				0.0121711			-0.0140542			0.0383832				0.0281576			0.0653406			0.0161595
0.0861074			0.0193721			0.0470275				0.0103668			-0.0155759			0.00785487				0.0466864			0.0948884			-0.0248135
0.0689298			0.0433456			-0.0214645				0.0216012			0.0352904			0.0505208				-0.0103064			0.0814528			0.0284104
0.0208418			0.0538338			0.0161875				-0.00597206			0.0220299			0.0306039				-0.00250596			0.036276			0.0053375
0.0780263			0.106387			0.0536708				0.018725			-0.00184351			0.0399965				-0.0140049			0.0663314			0.0536883
0.0875848			0.0346929			-0.0228701				-0.0129045			0.0654731			0.0398273				-0.0357029			0.076625			0.0117972
0.0515099			-0.0777008			-0.0394062				0.0481826			-0.0475995			0.0439544				0.0338339			0.0486079			-0.0200059
0.044638			0.0605217			0.00979525				0.0164821			0.0774643			0.0376742				-0.0416125			0.0521713			0.0313443
0.00869194			-0.00553194			-0.0151963				-0.00989102			0.0735475			0.0346631				-0.0617044			0.0848451			-0.0105154
0.0205996			-0.0667147			0.0290175				-0.0248217			-0.0297365			0.0179529				0.034207			0.0638224			0.0239512
-0.0291854			0.0237488			-0.0324385				0.001159			-0.059111			0.0270571				-0.0680541			0.0868461			0.00713653
-0.0229811			0.00794313			0.0728334				-0.00144096			-0.0194581			0.0690612				-0.0662895			0.0610812			-0.0145558
0.062783			-0.0925137			0.0157466				-0.00649782			0.0238075			0.0461071				-0.0366536			0.0500723			0.0154312
-0.0107209			0.0550863			0.121817				0.0136916			0.0941972			0.0163653				0.00576706			0.0953439			0.00574033
0.0104336			0.0636971			0.106946				0.00632846			0.00844279			0.00372788				0.0136143			0.0614654			0.0205575
0.0684144			0.0448684			0.27081				0.00916853			-0.0430124			0.00191006				0.0341923			0.052814			0.0185804
0.0488668			0.131831			-0.0412969				0.00437977			-0.0571882			0.011618				0.0217663			0.0773884			0.0380866
0.0338186			0.0584893			0.0206851				0.0363129			0.0477508			-0.00600012				-0.0302768			0.0448678			-0.0124943
0.0704448			0.0749557			-0.172877				0.00432443			-0.118112			0.0252577				0.0320928			0.0698576			0.0548392
0.0735681			0.0834994			0.0584057				-0.011172			-0.0574971			0.0373341				0.0314424			0.081381			0.0596066
0.0647575			-0.040499			0.025286				-0.0216721			0.0253738			0.00503411				0.0242269			0.0520817			-0.0268296
0.0112811			0.0601104			-0.0996171				0.0117506			0.0204145			0.010464				0.0294115			0.0518687			0.00187676
0.0459783			0.025598			-0.046268				0.0102146			0.0505526			-0.018957				0.0218573			0.0658497			0.0495494
-0.000985099			0.0688892			0.0463215				-0.00442475			0.0440266			-0.0835535				0.02094			0.0615797			-0.000554851
0.0919072			-0.0226013			-0.0320968				-0.0472715			0.111171			0.0146466				-0.0260406			0.0426576			0.0387168
-0.0281534			-0.0790301			0.0525599				-0.00398482			0.0431028			0.0134156				0.053975			0.0423877			0.00989112
-0.00410406			0.0800297			0.0605549				0.0298452			-0.023185			0.100485				0.0576234			0.0402665			0.000119762
0.304278			-0.0813194			0.0701513				-0.0312129			-0.0193878			-0.00552299				-0.0341482			0.0448632			-0.00101536
0.30858			0.0150062			0.0310245				-0.0483913			0.0636949			0.108217				6.17103e-05			0.050674			0.0473701
0.298206			0.0533517			0.0249401				-0.0799138			-0.0139559			-0.0325636				-0.0323538			0.0463848			0.0267101
0.236502			0.00673203			-0.0955575				0.0234678			0.0165984			0.1976				0.00654662			0.0807244			0.0302453
0.382247			0.0735695			0.0308128				0.0377157			-0.00565543			0.0547435				-0.041049			0.0669659			0.0132574
0.300183			0.0307745			-0.0425329				0.052546			0.0163601			0.326026				0.0125637			0.0553228			-0.000412181
0.25257			0.0124376			0.0485332				0.0136204			-0.00828427			-0.0281665				0.0734669			0.0656729			0.0115125
0.280342			-0.0346976			0.097485				0.0391451			0.0170355			-0.167953				0.0458216			0.0337196			-0.0318203
0.19285			-0.0252752			-0.00325814				0.0823319			-0.0591519			0.0667946				0.0755045			0.0405575			0.0272166
0.246433			-0.0655373			0.0120325				0.0248928			0.0234129			-0.00328491				-0.193223			0.0644826			-0.00934745
0.149465			-0.00708335			0.0553727				-0.00640958			0.0893347			0.00427798				-0.0337115			0.0528583			0.012762
0.29714			0.0839929			0.0336475				0.0969697			0.00791299			0.0875186				0.0468677			0.0486443			-0.00777109
0.259248			0.0485322			0.123077				0.121824			0.000700193			0.109503				0.0636063			0.0510445			0.0345471
0.19807			0.043029			0.11146				0.0534268			0.0333077			0.0949863				0.169938			0.0505829			0.0317148
0.192412			0.0660792			0.144552				0.0332935			0.150182			0.152317				-0.00898838			0.053736			0.0338132
0.269537			0.0441561			-0.018199				0.00677129			-0.00464832			0.0905399				-0.0858792			0.0439589			0.0172213
0.275172			0.0164658			0.00590483				0.0133632			-0.0153664			0.0397763				0.0316041			0.0686617			0.0230466
0.264221			-0.0262796			0.202437				0.0190534			0.0427044			0.0265417				0.170477			0.0634312			0.0213244
0.203363			0.00816929			0.0245329				0.1729			0.0706589			0.0269302				-0.134731			0.0307873			0.0147277
0.180966			0.00858199			0.0985962				0.095818			0.0166906			-0.0513944				-0.0933439			0.0434931			-0.0206704
0.184439			0.0482456			0.0326536				0.00790931			0.0531574			0.0965311				-0.0633679			0.0429619			0.000385858
0.0890079			0.0215081			0.0728622				0.131475			-0.0239782			0.0133926				0.0702199			0.0587211			0.0348911
0.283906			0.106892			0.0249949				0.0400236			0.0369102			0.0533997				0.0161289			0.0515046			-0.0158784
0.181082			-0.118741			0.0564406				0.0334517			0.090425			0.0681234				0.0242607			0.0726899			0.0151392
0.328206			0.0380641			0.00214793				0.0741439			-0.0390354			0.154754				0.0660695			0.043475			-0.0110475
0.403526			-0.0113627			-0.0406395				-0.0278089			0.0218626			-0.0292865				0.0228232			0.0590969			-0.000612694
0.229696			-0.0670038			0.101635				0.0790863			-0.0611939			0.0834701				-0.0167196			0.033637			0.012058
0.192426			0.029351			-0.0334886				0.00510032			-0.0383625			-0.122827				0.0351585			0.0481971			0.00155597
0.249491			0.0819568			0.0327937				0.0514192			0.113305			0.080344				-0.00988889			0.060244			0.0047615
0.174971			0.0182179			-0.00767306				-0.00803748			0.0604955			-0.159698				0.01797			0.0438893			0.0212026
0.247707			-0.0172868			0.0352881				0.0183962			0.0516728			0.0447211				-0.0503488			0.0641828			0.0342257
0.143708			0.0350291			-0.0399053				0.130557			0.0169843			0.0439911				-0.0229982			0.0370508			0.0212693
0.199495			0.00574535			0.0693354				-0.026782			0.0604771			0.0992003				-0.0686583			0.0736533			0.00491161
0.119916			0.0153229			-0.0191249				0.122594			0.0486658			-0.0355196				0.0446593			0.0594165			0.0284379
0.161857			0.114823			0.266722				-0.0345857			0.059231			0.206298				-0.0243197			0.0766234			0.0325587
0.175939			0.112497			0.0849892				-0.0130758			-0.0153165			0.0807315				0.0303698			0.0640782			-0.0586393
0.180503			0.00984551			0.141899				-0.0587246			-0.0923143			0.165169				-0.0581268			0.0458513			0.0245003
0.115369			0.0553476			0.190505				-0.00970901			0.0230248			0.205492				-0.0328227			0.0334802			0.0231271
0.0405756			0.00525306			-0.0359993				0.0442996			0.0304654			0.184037				-0.0151663			0.0673375			0.0506736
0.12241			-0.0270989			0.0247994				0.0644914			0.0300521			0.225228				-0.0104976			0.0506517			0.0302508
0.0792731			-0.0151912			0.151353				0.0302391			-0.00533147			0.237253				-0.0180318			0.0455897			-0.0179132
0.185737			0.126263			0.132321				-0.000736636			0.0211051			0.209876				0.0349766			0.0359768			0.033634
0.178378			0.088924			0.170231				0.0122325			0.0425164			0.216932				-0.113876			0.0505631			0.0410312
0.287624			0.0245454			0.128364				0.0170637			0.079604			0.149642				0.00174479			0.0498274			0.0214471
0.161894			0.127002			0.280675				0.0619103			0.0379192			0.240977				0.0604906			0.0510931			0.0160942
0.140652			-0.00711632			0.580274				-0.00318789			0.023383			0.183886				0.088205			0.0257415			0.0123769
0.103042			0.00377594			0.186102				0.0560591			0.0107445			0.17427				0.0466419			0.0364288			0.0518618
0.0715996			0.0666913			0.119269				0.00466198			0.0912548			0.208993				0.057197			0.0430901			0.00834398
0.223469			0.098057			0.140589				0.0466424			0.0459732			0.152958				-0.0594647			0.0261319			0.0203058
0.187942			0.0634913			0.0991506				0.0145578			0.0448884			0.225332				-0.00649477			0.0529362			-0.015551
0.19434			0.0577812			0.223503				0.00271541			0.0368398			0.236461				0.070705			0.0503157			-0.0420539
0.21817			0.0671014			0.211469				0.0228921			-0.000256178			0.191656				0.0650557			0.0260068			0.0104287
0.0735005			0.126646			0.222646				-0.0103799			0.058985			0.240581				-0.00163882			0.0305144			-0.0301399
0.231181			0.0627439			0.131946				-0.148269			0.0690652			0.23814				0.0225306			0.058379			0.059132
0.105075			0.101615			0.131482				0.0947079			-0.00247839			0.223744				-0.0526424			0.0486097			0.0128706
0.147531			0.0201749			0.142951				0.0742092			0.0324946			0.220458				0.0358587			0.0511768			0.0283828
0.124888			0.158106			0.255915				-0.00470637			-0.0129173			0.206582				0.0787572			0.0414625			-0.00366778
0.160593			0.0120269			0.184029				-0.0142611			-0.032448			0.24353				-0.0295833			0.0249115			0.00396091
0.156403			0.00227803			0.544483				-0.0318735			-0.0197909			0.133996				-0.146979			0.0398186			0.0291643
0.226556			0.0218584			0.128015				0.135194			0.0743658			0.239866				-0.118093			0.0581737			0.0479055
0.149334			-0.02044			0.338685				0.0356268			-0.00337302			0.0991387				0.0235248			0.0363502			0.0053715
0.237596			0.0240743			0.0857629				-0.0794334			-0.0171427			0.169086				0.0673188			0.0510094			0.00730938
0.230455			0.0441704			0.253546				0.0758398			0.0106039			0.151575				0.018915			0.0308642			0.0105958
0.257388			-0.0305833			0.152654				-0.0447838			-0.0311444			0.141141				-0.081802			0.0509274			0.0253337
0.0534272			0.128169			0.212352				0.0694979			-0.0304134			0.152602				0.0532014			0.0452737			0.00362388
0.29186			0.127647			0.126437				0.0383282			-0.0336255			0.122793				0.0442844			0.0499611			0.0194392
0.187504			0.101541			0.0885546				-0.0104358			0.0442749			0.192132				0.100846			0.0484751			0.0278736
0.264857			0.0502935			0.204286				-0.0199076			0.029103			0.192479				0.0672138			0.0427446			0.0305785
0.269289			0.0480832			0.31563				0.00703322			-0.0276993			0.204024				0.0639598			0.0308835			-0.00747355
0.0691267			0.0214083			0.182035				0.0194867			0.0532449			0.13737				0.0819083			0.0420678			0.0198646
0.23634			0.080304			0.120066				-0.0167079			0.0588069			0.207059				0.0373882			0.0514665			0.0076301
0.164474			0.018845			0.0787456				0.0839136			0.0497872			0.190325				-0.0482524			0.0709377			-0.020909
0.188756			0.136271			0.318479				0.100705			-0.00597672			0.180554				-0.0900771			0.0429161			-0.0317922
0.117618			0.019366			0.140118				0.0438064			0.0408091			0.174274				0.012545			0.0445124			0.0162128
0.075577			0.132471			0.255995				0.0577804			-0.00725749			0.124971				-0.244585			0.033867			-0.00684164
-0.0498766			0.117666			0.150561				-0.0873912			0.040188			0.193				0.0573463			0.0515795			0.00107715
0.119021			0.0800869			0.116679				0.229593			-0.0582733			0.202393				0.115664			0.0259542			0.0241046
0.173714			0.0796974			0.26957				0.0720909			-0.0152986			0.104565				0.0636911			0.0299193			0.0124881
0.192698			0.0558667			-0.172341				0.0859106			-0.0238985			0.18173				-0.0278832			0.0800116			0.0358074
0.173046			-0.0488584			0.0655524				0.0827631			-0.0168706			0.389676				-0.00733436			0.0372475			0.00356088
0.126308			0.0417815			0.0458682				-0.0344721			0.0158525			0.315037				0.175332			0.0457727			0.0207024
0.192055			-0.00409207			0.0545614				-0.0476354			-0.0260387			0.251183				0.00858227			0.0686764			0.00751799
0.0587305			0.111342			0.482379				0.00802634			0.0489655			0.406794				-0.169971			0.0329212			-0.00430496
0.0668407			0.0538299			0.225268				0.0869422			0.0206874			0.379926				0.0361868			0.0300517			-0.030454
0.136357			0.0726913			0.309777				0.131574			0.0780721			0.399778				0.0674209			0.0632553			-0.00503399
0.232044			0.0651099			0.271042				0.11493			-0.00473004			0.43821				0.0395339			0.0441998			0.0180795
0.17951			0.144624			0.47306				0.118911			0.0468746			0.335527				0.0090059			0.0649523			-0.0042098
0.0973874			0.0172417			0.181705				0.0144549			0.00196384			0.393478				0.0212111			0.0525765			0.0320715
0.228992			0.0622594			0.16543				0.0234303			0.0416357			0.392471				-0.0430305			0.0596584			0.0310907
0.0299264			0.00167918			0.189725				0.0642443			0.0288323			0.35961				0.0652141			0.0407687			0.00615988
0.16991			0.0310906			0.11293				0.00379125			-0.05671			0.331739				0.027593			0.0368638			0.0277381
-0.0804198			0.00661085			0.0836658				0.0222391			0.0656824			0.40533				-0.0095406			0.0343312			-0.047134
0.204117			0.0754174			0.378563				-0.098424			-0.00414853			0.43116				-0.0202781			0.0219866			0.0414761
0.132737			0.0308063			0.257423				-0.0922612			-0.00935321			0.369238				0.025798			0.0365009			-0.0206504
0.0972372			0.0368102			0.13075				0.10115			0.0403217			0.358793				0.0962649			0.0405565			-0.0260529
0.0971636			0.0533043			0.163282				0.00133348			0.0611787			0.276346				-0.0013755			0.0288991			0.029484
0.129912			0.0326315			0.159711				0.0795721			0.0346532			0.202613				-0.00345321			0.0621876			-0.0155448
0.115212			0.0132045			0.0615689				0.0582785			-0.0393583			0.00653479				0.0538399			0.0266024			-0.00548732
0.0821063			-0.0667489			0.210182				0.0658048			0.119713			0.075212				0.0786532			0.0386942			-0.0256322
0.0695562			0.034346			0.097049				0.167216			-0.0621585			0.299892				0.0225817			0.0422465			0.0177866
0.184921			0.055134			0.123475				0.0539665			-0.000511015			0.194765				-0.0131143			0.0496651			0.00355753
0.0635688			-0.00577392			0.0161775				-0.00828377			-0.000559919			0.112741				0.141872			0.031743			0.0180008
0.000657076			0.0228936			0.087828				0.140464			-0.0117207			0.456192				0.183599			0.0698562			-0.01416
-0.0786682			0.029315			-0.0295021				0.0194277			-0.0211014			0.115566				0.0970902			0.0502726			0.0204138
0.00290141			0.0207455			0.127451				0.104339			0.0280829			0.284632				0.161225			0.0339441			0.0311571
0.0909934			-0.0273366			0.0288326				0.0381559			0.0325017			0.151693				0.117713			0.0445021			-0.01543
0.124813			0.141267			0.20178				-0.0964149			0.0672164			0.232551				0.0866994			0.045738			-0.0619419
0.112372			0.0179009			0.192857				0.101677			0.0533743			0.305257				-0.110808			0.0352327			-0.0344145
0.0543835			0.0324833			0.0606043				0.0166933			0.0303693			0.330234				0.0374479			0.0374367			-0.0184634
0.139534			-0.00291838			0.123705				0.0395356			0.0492383			0.481753				0.0111241			0.0369115			-0.0632699
0.132881			-0.0196299			0.0992082				0.0240643			0.118557			0.0673973				-0.15651			0.0402023			-0.0218977
0.0941209			0.00843641			-0.00295734				0.0775612			0.111076			0.0401312				0.212182			0.0393697			-0.0305942
0.170547			0.0481598			0.13781				0.0300629			-0.00189704			0.0650301				0.151561			0.0301724			-0.0279724
0.0537285			-0.0377743			0.0906092				0.0817546			0.103801			-0.0151156				0.115531			0.0367056			0.0038188
0.0883455			-0.0121372			0.203489				-0.00153233			0.00683862			0.0166901				0.0810765			0.0322517			-0.00368721
0.0962675			-0.163851			0.225919				0.00662354			0.00629343			0.0105958				0.040886			0.0328923			0.027742
0.167			0.104066			0.190675				-0.0105977			0.0595453			0.0435801				-0.0721681			0.0403728			-0.040745
0.0186172			0.0624308			0.0831285				-0.161311			0.0898309			-0.0619677				0.0968651			0.0436336			-0.0112202
-0.0553074			-0.0324509			0.165756				-0.206185			0.0372711			0.0281425				0.0599336			0.0509445			0.0109889
-0.00811467			-0.0182543			0.0813249				0.0637388			0.0150996			0.0540114				0.194426			0.0508264			0.105032
0.0299415			0.0616449			0.113793				0.0150481			0.0251279			0.0837185				0.23058			0.0217376			0.0328508
0.149052			0.0317577			-0.103543				0.0415057			0.0509056			-0.0824455				-0.0326262			0.0187304			-0.0710947
0.108274			-0.0763445			0.0556135				-0.0576508			0.063062			-0.0246916				0.0930021			0.0336205			0.0201761
0.113804			-0.00329735			0.0944819				0.0781651			0.0505678			0.0613478				-0.0806345			0.0652171			0.0119276
0.19841			0.0934104			0.142668				0.070947			0.0936504			0.0566954				-0.0122295			0.0482401			-0.0465789
0.118482			0.0453077			0.13208				0.0423494			0.0603852			0.0112541				0.19189			0.0642306			-0.0357506
0.19418			0.046182			0.0528779				0.0472953			0.00385592			0.0052437				0.0895968			0.0422535			0.0156804
0.0162315			0.0451636			0.0761266				0.0932059			0.0224052			0.131511				-0.0124539			0.0467172			-0.060726
-0.030855			0.026045			-0.12933				0.0146267			0.0461604			-0.0662731				0.01582			0.0459275			-0.000959756
0.061587			-0.0117294			0.0621107				0.0706842			0.00674534			0.108257				0.0505348			0.0381224			0.0357845
0.0592293			0.064061			0.0279096				0.0506982			-0.0291911			0.0581376				0.080626			0.0293038			0.00212977
-0.0220268			0.0320527			0.0587169				0.0691886			0.0206209			0.036158				-0.13216			0.0401472			-0.0198796
-0.0485658			0.0335361			0.09443				0.0131933			0.098732			0.0175463				0.203413			0.0560492			0.0489039
0.0438895			0.0320861			0.0238018				0.314602			-0.0114804			0.0438092				-0.00661885			0.045647			0.0199032
0.0829261			0.0215248			-0.00153575				0.235178			0.0100414			-0.0706414				-0.108982			0.0388574			0.0051165
-0.0253365			0.0760289			-0.0244715				0.255837			-0.00692331			-0.00431396				0.106217			0.0713368			-0.0198759
0.028703			0.0528676			0.085681				0.265207			0.0762123			0.0146097				0.139471			0.0513478			-0.011887
0.0853333			0.0328127			-0.027954				0.219798			0.0641319			-0.0361872				-0.0406314			0.0251461			0.140398
-0.011584			-0.013846			-0.0082853				0.265212			0.0277544			-0.0809912				0.0687028			0.0294616			0.0265125
0.0264247			0.0119267			0.00133261				0.246371			0.0457118			0.106524				0.0400721			0.0718201			0.0528591
0.0109733			0.0191133			0.0611858				0.209156			-0.000192582			-0.0673239				0.0350611			0.0602289			0.0930608
0.0866946			0.0426955			0.00617752				0.212937			0.0252109			0.0706618				-0.158629			0.0105563			0.076984
0.0681317			0.0322527			0.00421571				0.11896			0.0749979			0.0650986				0.039897			0.0350442			-0.0762556
0.00860316			0.0669628			0.0210855				0.206191			0.0140133			-0.0265106				0.127969			0.0186965			-0.214872
-0.010222			0.057886			0.0953531				0.179397			0.0472801			-0.088381				-0.0282575			0.0275103			0.0842807
0.0086589			0.00641558			0.0995883				0.160314			0.0707168			-0.0987435				0.00974269			0.0140254			-0.0441662
-0.0552525			-0.0126617			0.0649564				0.179288			0.112089			0.0343658				-0.0293547			0.0222674			0.106198
-0.865867			0.0662149			0.0131841				0.25273			0.00218807			0.403637				0.078672			0.0152578			-0.0550759
-0.0557302			0.00361205			0.0458422				0.143446			-0.0637195			0.145983				0.370179			-0.00865398			0.125741
-0.0266345			-0.0067323			0.0725675				0.149696			0.0585202			0.12439				0.0236669			-0.0298566			-0.103147
-0.0539108			0.0542131			-0.0250171				0.114809			0.117094			0.00596357				-0.102937			0.0214364			0.0580208
0.0877218			0.0428302			0.0398385				0.137373			0.163648			0.175228				-0.10246			-0.00748694			-0.0302794
0.0474425			0.0338894			0.025324				0.122596			0.0714142			0.144015				0.0895355			0.0166846			-0.0172939
0.0343349			0.0560718			0.0159057				0.0816368			-0.00557671			0.0683507				-0.034382			0.0347955			0.151031
0.0554127			0.0655743			0.0574018				0.163344			0.0619076			-0.0574825				0.118676			0.0749928			-0.165141
0.0362915			-0.00404037			-0.0690108				0.18421			0.0414385			0.144927				0.716897			-0.0180131			-0.00236304
0.0557497			0.000566577			0.0905693				0.170309			0.0771922			0.114539				-0.00410131			-0.00271341			-0.00264519
0.0615571			0.00734373			-0.00912338				0.155171			0.0846503			0.0425938				-0.258186			0.0487697			0.20027
-0.0749178			0.0688548			-0.00912981				0.159807			0.0129543			0.0314252				0.000161189			0.0544967			-0.119396
0.0499427			0.0117306			0.0648518				0.102008			0.0877362			0.0235054				-0.0114366			-0.00859255			-0.0704516
0.00102967			0.0528729			0.00563452				0.109888			0.0282654			0.0164136				0.0453428			0.0216099			-0.184632
0.114722			-0.0200341			0.0909395				0.127588			0.0469495			0.122809				-0.0229071			-0.0623919			-0.113827
0.0126338			0.0481801			0.0774525				0.106334			0.0393991			-0.0606756				0.406564			0.0192124			0.0336212
0.108407			0.0456987			0.0197011				0.107217			-0.0101373			1.14297				0.0353162			-0.00419771			-0.00330655
0.0619327			0.0158455			0.0525545				0.107648			0.0357999			0.656023				0.159114			0.0779237			-0.0340319
0.00902599			0.0254661			0.118318				0.0970993			0.0377464			0.405614				-0.0863895			-0.0112762			0.248407
0.0819792			0.0201215			0.000984913				0.184649			0.0674687			0.56282				0.0395302			0.00599952			-0.0659107
0.0264848			0.00564954			0.0358183				0.135591			0.0153858			-0.0736118				0.0301023			0.0694985			-0.0296233
0.0270112			0.0381222			0.0948858				0.111033			0.0689922			0.0753603				-0.191725			-0.202653			-0.0580135
0.0665382			0.0759089			0.00698103				0.0890034			0.0601586			0.644291				0.126695			0.764907			0.0666403
0.0623485			0.0494786			0.0159993				0.16064			0.0976617			0.760073				-0.153652			0.195712			-0.0269765
0.0393544			0.0327106			0.112913				0.172035			0.0458233			-0.289981				1.0908			0.0919355			0.0138743
0.0302213			0.0223499			0.0767574				0.157339			0.0481247			1.02563				-0.0239526			0.0746387			0.00786411
0.0738616			0.0424657			0.0227158				0.00866244			0.0284652			0.85905				-0.980037			0.109721			-0.0410118
0.0443452			0.00280317			0.0423109				0.106821			0.143192			0.961475				0.14037			0.0504195			0.0475476
-0.00208929			-0.00902241			0.0521031				0.160582			0.0696105			0.62092				0.105031			0.140786			0.0802061
-0.0502705			0.0023559			0.0371701				0.117625			0.0824181			0.449005				0.125075			0.0794302			-0.0805059
-0.0661241			-0.0314911			-0.0354768				0.148432			0.0532471			0.31913				-0.0725589			0.0245775			-0.0180223
-0.0241616			0.0569778			0.0188953				0.160833			0.00785941			0.37338				-0.000214878			0.0678378			0.118273
0.0900299			0.0433441			0.0111868				0.230873			0.0618507			0.420788				0.0669782			0.114443			0.0075961
0.00621097			0.02695			0.0284606				0.218961			-0.0179913			0.76514				0.0708883			0.114044			-0.0052079
0.0786362			0.0570163			0.0503444				0.190725			0.00740496			0.858844				0.249359			0.0462611			0.0772679
-0.0168988			0.018499			0.0381299				0.165689			0.0345823			0.910775				-0.0105142			0.0361177			0.0868236
0.0371574			-0.0506146			0.110729				0.248936			0.0204081			0.729346				-0.00748798			0.0369444			0.117405
0.124994			0.0220471			0.0427815				0.174023			0.0817626			0.952234				0.0481856			0.0340694			0.0951283
0.127561			0.011385			0.041754				0.247572			0.0766951			0.805013				-0.247761			0.0172041			-0.0610125
-0.0156642			0.00589178			0.0614527				0.226893			0.10628			0.767108				0.153852			0.0587666			0.113433
0.186593			-0.00670009			0.0566362				0.238647			0.0759793			0.535892				0.00914442			0.02295			0.0497673
0.0938702			0.044795			0.00433215				0.21636			0.058875			0.457251				-0.150834			0.0240527			-0.0883222
0.0452551			-0.0376365			0.00645579				0.180856			0.0590497			0.389097				0.15219			0.0789297			-0.0874578
0.00303428			0.0116734			0.0434645				0.222026			-0.00786469			0.351885				-0.0418393			0.045632			0.0636954
0.122614			0.0297887			0.024312				0.16461			0.0654771			0.41163				0.255114			0.0422085			-0.0334458
-0.024209			0.0650754			0.0686163				0.25687			0.0784607			0.44479				0.127703			0.0876461			0.180901
0.155504			-0.000592528			0.0343037				0.188191			0.0423679			0.378199				0.205074			0.13911			0.0138578
0.0556158			0.0515059			-0.0191398				0.189596			0.0177868			0.270628				-0.171516			0.062595			0.0418652
-0.142223			0.00428057			0.0739332				0.131017			0.0556026			0.349846				0.119454			0.0323053			-0.022134
0.0506147			-0.0143024			0.0691502				0.137653			0.0211795			0.509678				-0.235696			0.0536621			0.0830268
-0.0238894			0.035081			0.0905537				0.184608			0.0659264			0.376056				0.129766			0.0147707			0.140519
0.118536			0.0363075			0.083749				0.153082			0.112091			0.154631				0.124864			0.0366522			0.0825258
-0.0645241			0.051021			-0.00755851				0.196356			0.0673132			0.159723				-0.108849			0.0176558			0.00270116
0.0225742			0.0282174			0.0649531				0.194163			0.10108			0.414489				0.268819			-0.0221715			-0.013752
-0.0413799			0.0285371			0.0843335				0.163298			0.0885005			0.418076				0.174853			0.105231			0.0957187
0.192289			-0.0163026			0.0143956				0.168824			0.0847382			0.0568713				0.0423987			-0.0219431			0.288485
0.153233			0.0682203			0.0545805				0.121739			-0.0131351			0.35153				-0.00779785			0.0390155			0.084065
0.189782			0.0650025			0.0713532				0.156468			0.0143567			0.362167				0.213014			0.0440503			0.125201
-0.033472			-0.00702657			0.0849637				0.159806			0.066708			0.386429				-0.0782561			0.0825239			0.0248576
0.010874			0.0547061			0.047617				0.129114			-0.0684577			0.326589				-0.0527744			0.0975309			-0.0697833
-0.0836759			0.0696507			-0.0285506				0.249696			0.0475508			0.337616				0.218016			0.0872719			0.0480359
0.066908			0.0319844			0.232129				0.209798			-0.10726			0.397313				0.0454091			0.0885986			-0.0653132
0.0909459			0.065298			0.168055				0.165835			0.0804			-0.0224607				0.154943			0.0257782			0.098832
0.0918587			0.0450559			0.0684461				0.145889			0.0725457			0.42935				0.210387			0.0313035			0.0265484
-0.155218			0.0109378			0.0179923				0.143301			-0.0149117			0.144867				0.109875			0.0875672			0.0946576
-0.017382			0.0486236			-0.568817				0.109835			0.0878998			0.0646293				0.138846			0.0665136			0.119108
0.0121674			-0.00339812			-0.00604531				0.141363			0.00973062			0.0774273				0.158142			0.0803771			0.0924107
-0.0299585			0.0406874			0.182081				0.175721			0.0269258			0.143406				0.101611			0.0674673			0.0159808
0.0590359			0.00864666			0.110293				0.142923			0.0759412			0.0565534				0.210733			0.0372848			-0.0695723
0.0243982			0.00892073			-0.147319				0.175181			-0.0417525			0.1128				0.0304114			0.0582641			0.00799682
-0.0402467			0.0627714			0.131535				0.180776			-0.0442743			-0.0994892				0.163129			0.0659147			0.0731547
-0.0765049			-0.055469			0.161133				0.192125			-0.000524252			0.0312701				0.255732			0.0628513			0.0543725
0.107162			0.0442166			0.0819796				0.224693			0.00686025			0.00352417				-0.0210692			0.0874195			-0.0018235
-0.0774935			0.0606907			-0.0646435				0.186216			-0.0917681			0.0640798				-0.0269667			0.092315			-0.0868371
0.100176			0.0180506			0.115133				0.141146			0.066363			0.110447				0.110569			-0.0668542			-0.0319449
0.119429			0.0138241			0.105035				0.224127			0.0192663			0.0618535				-0.168979			0.00816			-0.0154176
0.0459897			0.0484507			0.362702				0.1723			0.071583			0.0647445				0.0574804			0.0125896			0.152968
0.0782461			0.0280253			-0.0544745				0.198082			0.0102781			0.0277895				0.18647			0.0887436			0.175146
0.113821			0.00413591			-0.142006				0.202047			-0.0438885			0.0412842				0.193641			0.00589709			0.083602
0.102112			0.00955919			0.216918				0.205278			0.031465			0.0204564				0.119775			-0.0551687			-0.100721
0.186902			-0.0208			0.0703668				0.250937			0.0128284			-0.146091				0.234329			0.109698			-0.046908
-0.06439			0.0477312			0.136548				0.18107			-0.00104002			0.0471683				0.173321			0.0786867			0.0111265
0.278361			-0.0232574			0.0580784				0.144734			-0.0444857			0.053089				-0.190224			0.0521362			-0.00789701
0.101968			0.0092348			0.0603771				0.0763131			0.0428445			0.0459681				0.0966921			0.0744941			0.106941
0.164134			-0.00730082			0.18623				0.248147			0.0335291			0.00423539				0.0991523			0.0454733			0.000903468
0.0303787			-0.0138986			-0.151862				0.132756			0.0269584			-0.118046				0.158457			0.119687			-0.0162823
-0.0132302			0.0198207			0.0633466				0.190569			-0.0664261			0.0558299				0.0631663			0.01854			0.00233923
0.0126784			0.0423056			0.0758547				0.170381			0.0484392			0.02108				0.21819			-0.0121939			0.0350985
0.0516459			0.0630266			-0.0594146				0.127635			0.018217			0.0193421				0.276009			0.0312091			0.0777867
0.04231			0.0927306			0.0438708				0.167697			0.0361819			0.0503267				-0.00245902			-0.00264942			0.110375
0.0673865			0.000393508			0.155006				0.101055			-0.0103527			0.0838978				-0.0441598			0.0733206			-0.126788
-0.00135647			0.053952			0.0592603				0.0334787			0.0363019			0.102713				0.0211587			0.0365168			0.0777231
-0.0621164			0.0336634			-0.0812623				0.0698866			0.0427412			0.0809541				0.202999			0.0672622			0.117156
0.0804044			0.0557695			0.10593				-0.00718371			-0.00401439			0.0969192				-0.0104823			0.03126			0.0624484
0.0353864			-0.00646628			-0.773002				0.0172678			0.00804772			0.0580055				0.0787645			-0.0424671			-0.0251406
0.0815299			-0.0666529			-0.0849134				0.00294112			0.0362922			0.0673893				0.0973507			0.0454311			0.91135
0.0807211			-0.0180162			0.197167				0.0316272			-0.0671333			0.0955986				-0.506416			0.0431175			-0.585783
-0.00343289			0.204685			0.144226				-0.0241774			-0.0603146			0.115398				-0.0658299			0.0303858			-0.120788
0.0506803			0.0729907			-0.0390149				0.0366446			0.00578102			-0.00964235				0.206894			0.0242619			-0.0498616
-0.0674443			0.0154428			0.114159				0.0291594			-0.00969331			0.0438936				0.17162			0.0385184			0.0462951
-0.0186887			0.0517459			-0.0150303				0.000924531			0.0233283			0.018173				0.180983			0.0460102			0.0437682
-0.0439393			0.0260499			0.00155013				-0.0128629			0.00487912			0.0759687				0.271124			0.101428			-0.0127257
0.13168			0.0497774			-0.0649101				-0.014672			-0.0318162			0.0709068				0.339387			0.000365494			-0.0366205
-0.00773127			0.17231			-0.0844555				0.00738142			0.041099			0.0216401				0.0670081			0.00967889			-0.0267122
0.0527593			-0.11257			0.101334				0.0470191			0.0861448			0.0042197				0.207522			0.0885885			-0.332159
-0.0900446			0.0894566			0.198192				0.0144518			-0.0473561			0.00472895				-0.00612175			0.0407768			0.415171
0.0242404			0.0672858			0.0823029				-0.0358095			0.0152771			0.0968624				-0.0344529			0.0302337			-0.0469093
0.0498149			-0.0832392			-0.0568584				0.0129656			-0.0191706			0.0783262				0.191444			0.0458959			-0.338806
0.113177			0.0971412			0.16933				0.0408567			0.0160544			0.0246893				-0.0879631			-0.0124871			-0.0300353
0.0472861			0.049358			0.0634813				0.0525284			0.0585452			0.0574612				-0.0604852			0.0121381			0.0657289
0.026946			-0.146967			-0.0968755				0.0376743			0.0120374			0.243393				0.0322186			0.0136924			0.00925411
0.0645028			-0.0670641			0.870438				0.00595125			0.122951			0.089404				0.00122851			0.0685349			0.0502015
0.0469347			0.149032			0.114327				0.0630859			0.12705			0.202822				0.0123458			-0.00710235			0.0237813
0.0851917			0.182634			0.237441				0.0279379			0.0191236			0.186401				0.0386091			0.0645003			0.00586585
0.0758155			0.0770572			-0.0444092				0.037156			-0.0293309			0.0850703				0.0512945			0.139147			-0.0102223
0.0917117			0.099842			-0.0791321				0.0161197			-0.0581211			0.0652125				0.047763			0.116382			0.0878327
0.0595356			0.0565458			0.0434375				0.0400667			0.0441856			0.267928				0.0224846			-0.0667271			0.084236
0.0158044			0.0179017			-0.142131				0.073254			0.0939173			0.249723				-0.00160468			0.259141			0.0455245
0.0240807			0.107101			0.128383				0.00275916			0.0356769			0.0941851				0.0186152			-0.198726			-0.0234269
0.0519848			0.0939491			0.153694				0.0200342			0.0609576			0.293133				0.0812712			0.0872392			-0.035188
-0.012739			-0.0368615			0.520538				0.0257833			-0.0174295			0.0456011				0.00644339			0.195984			0.154742
-0.0598714			-0.0927674			0.0920856				0.0174781			-0.0829868			0.143994				0.0382092			0.105683			-0.0519371
0.0089046			0.0691421			0.193236				0.0417472			0.0312426			0.123207				0.0225517			0.11441			0.053957
0.0378279			0.0368227			-0.0189457				-0.0338744			0.00250465			0.210911				0.028785			0.0586376			-0.00570675
0.0392469			0.0200211			0.0360382				-0.00211704			0.0329366			0.037871				0.0375797			0.107895			0.0781779
0.0385514			0.0506473			0.0758227				0.00299196			0.0177361			0.195105				0.0229559			-0.0575342			-0.00301239
-0.0147769			0.0642695			0.139413				0.0642116			0.0544001			0.155643				0.0386221			0.29399			0.0316847
0.00854721			-0.0105585			-0.115385				-0.000279171			-0.0365952			0.110879				0.0493333			0.0985515			0.00802843
-0.0790097			-0.015716			-0.0690843				0.0218758			0.0221307			0.274314				0.0241994			0.0517895			0.0565972
-0.0114272			0.0809959			0.0642253				0.020106			0.0517959			0.074083				0.0193774			0.00329401			0.0482511
0.0375375			0.0654229			0.0948808				0.0148204			-0.00690405			0.174211				0.0495607			0.171366			0.0852413
-0.0167188			0.0767373			0.069391				0.0157047			-0.0105002			0.0903724				0.0178138			0.132886			0.0430885
0.0235275			-0.135011			-0.0464407				0.0687604			0.013757			0.135147				-0.0154875			0.146409			0.0376975
0.0330966			0.0577775			0.196954				-0.00923329			-0.00130203			0.0919063				0.0428064			0.112169			-0.0115049
0.0257215			0.0688018			-0.050452				0.0541628			-0.0425659			0.103048				0.0439871			0.0118889			0.141351
0.0372166			0.0561181			-0.184139				0.0561276			-0.0817743			0.0701956				0.029512			0.144245			0.0367844
0.0024065			0.0640295			0.0759904				0.0052692			0.01986			0.118183				0.0212644			0.174084			0.0264439
0.0435783			0.132054			0.270478				0.0912156			0.00285013			0.476387				0.0410377			0.115644			0.0375236
0.0268437			0.0321112			0.158669				0.0311754			0.0321084			0.111679				0.0332125			0.0542147			-0.0451635
0.0340633			-0.000997362			-0.0101305				-0.0202535			-0.0493315			0.255335				-0.0104333			0.0693545			0.0397392
0.0160012			0.0589392			-0.255395				-0.00443174			-0.00536028			0.195202				0.0118602			0.157257			0.0421399
-0.00917698			-0.00254365			0.210177				0.00167849			-0.0553222			0.0793226				0.0527547			0.0298937			0.252621
0.0558883			0.10483			0.00360051				0.0346226			-0.00860657			0.0405383				0.0429664			0.269676			0.0737823
0.00262952			0.0341109			0.0223209				0.0728614			-0.0571897			0.0424939				0.0296787			0.571114			0.098809
0.063478			0.0648152			0.0994102				0.082492			0.00889263			0.055608				0.0498848			0.122663			0.00596287
0.00702346			0.0720051			-0.00795662				-0.00183547			0.00732556			0.0669265				0.022367			0.0710067			0.0121508
-0.013128			0.0595772			0.0498803				0.0772789			-0.0227593			0.0306353				0.0360453			0.307076			0.0551669
0.0219694			0.0913608			0.13113				0.0252231			0.026055			0.029895				0.00805838			0.164631			-0.0356893
-0.0421212			0.112118			-0.136612				0.0563642			-0.0124332			0.0303701				0.0422027			0.0500806			0.0889254
-0.0282514			0.0821049			0.0721149				0.0281264			-0.0117356			0.0423253				0.0277867			0.174591			-0.0912546
0.0188367			0.0724833			0.0253175				0.0732502			-0.11384			0.0187958				0.0406503			0.157789			0.0132857
-0.00930159			0.0644839			-0.00548152				0.0110913			-0.0315369			0.0320055				0.0202877			-0.0979592			0.108286
0.0753578			0.0367682			0.0170919				0.0128219			-0.129603			0.0288632				0.0213017			0.0172752			-0.023225
-0.00985907			0.0702271			-0.0438552				0.0533801			-0.110912			0.0474512				0.00461557			0.104912			0.0833121
-0.0672359			-0.0257631			-0.13376				0.103961			0.0488985			0.0277471				0.0449213			0.274734			0.00430791
0.00969616			0.0249674			0.0355009				0.00208559			0.0370871			0.0411766				0.0675209			0.225273			0.0688335
0.0363104			0.032041			-0.0723785				-0.0506718			0.0674289			0.0187656				0.00961376			0.0890534			0.0236686
-0.0080872			0.0555935			0.105029				0.0358751			0.0451924			0.0564259				0.0216147			0.0312981			-0.0120054
0.0516203			0.0157596			0.0859695				0.0592412			-0.0348674			0.0556041				0.0390564			0.0819738			0.100292
0.0280217			0.00797913			-0.215203				0.0728756			-0.037866			0.0536666				0.0622482			0.238316			0.0746881
-0.00883202			0.0356782			-0.0102007				0.0432068			-0.00816526			0.0194706				0.0537063			0.196039			-0.0049431
0.0198973			0.0777041			0.164413				0.054666			0.00947856			0.0371492				0.0489844			0.293643			-0.0247166
0.0215188			0.126275			0.181815				0.0113842			0.03085			0.022766				0.0592972			0.176792			-0.0707519
0.056319			0.0172685			0.08341				0.00755608			-0.0641537			0.0619075				0.0171178			0.0829939			-0.0275269
-0.0693206			0.0411083			-0.0269187				-0.0277092			0.0885734			0.0500312				0.0191177			0.125398			0.0239811
0.00839322			0.036324			0.104335				0.0738922			-0.143428			0.0119102				-0.00426485			0.0527776			0.104962
-0.0670025			0.0770262			0.0638552				0.0759227			0.0695445			0.0498777				0.0171143			0.164651			-0.0348866
0.0723544			-0.0400775			0.0622733				0.0659288			-0.0506404			0.0374019				0.0438711			0.0709463			0.0450719
0.0193897			0.0899642			0.0631756				0.0282956			-0.02805			-0.0105422				0.0525913			0.130882			-0.0055454
0.0737363			0.0329146			0.0111889				0.025425			0.01015			0.0433866				0.0228102			0.176308			0.132933
0.0257174			0.00226056			-0.0106996				0.0663401			-0.0526404			0.0577047				0.0083974			0.139767			-0.0835894
-0.00303011			0.0275113			0.11046				0.159593			0.0518136			0.0479601				0.0447705			0.107906			0.0164627
0.0114841			0.105138			-0.00616299				0.0191894			-0.107391			0.0372729				0.0630063			0.130267			0.0745628
0.0183603			0.0645469			0.333169				0.0494719			0.0290101			0.0512271				0.0532281			0.161627			0.0965258
0.0161489			0.136582			0.100991				0.0680066			0.0507644			0.0894958				0.0279813			0.100345			0.0858839
0.011619			0.0632537			0.140309				0.019719			0.0228515			0.0203955				0.0580349			0.0860481			0.0207623
0.0284139			-0.00105068			0.000218614				0.211488			0.00716456			0.0455188				-5.23536e-05			0.102855			0.0522329
-0.00625613			0.1372			0.00370553				0.0928045			-0.0774461			0.0674758				0.0536617			0.180369			0.0350477
0.0823127			-0.0179067			0.202984				0.13279			-0.00699232			0.064742				0.0534157			-0.0293729			0.0452158
0.102672			0.0866901			0.0792274				0.183132			-0.0225888			0.0455153				0.0121123			-0.00631121			-0.0207861
0.0276996			0.0465067			0.0573848				0.0878106			0.000656733			0.0438599				-0.0355323			0.122248			0.0496591
0.0480891			0.0472943			-0.0129947				0.0837699			0.0307707			0.0626602				0.0246038			0.0590582			0.0560185
0.0654425			0.0957036			0.0393437				0.135425			-0.0156226			0.0583085				0.0204311			0.153981			0.0976491
0.0648367			0.0840396			0.089517				-0.0432062			-0.0255651			0.0470046				0.0563593			0.173547			0.0367678
-0.00218229			0.0548823			0.149074				-0.0873516			0.00315821			0.0316583				0.0225402			-0.036313			0.0687285
0.020946			0.073364			0.0533615				0.0709103			-0.00184327			0.0505246				0.0318853			0.0484317			-0.0407849
0.0312362			-0.00557953			0.0707107				0.0260256			0.0987111			0.0468253				0.02309			0.0877093			-0.0421032
0.0125247			0.108302			0.125382				0.127454			-0.0268222			0.0314494				0.0639215			-0.0690614			0.0570126
0.0335128			0.0989648			0.147703				0.0699091			0.0145475			0.0258738				0.05694			0.0155257			0.0229927
0.0168795			0.0415604			0.443701				-0.0098594			0.039716			0.0247751				0.00915852			-0.0131725			-0.0423891
0.00427671			0.0464105			0.0805291				0.125483			-0.0616113			0.0361878				0.0243198			0.00406062			0.0163616
0.083744			0.0697064			0.214647				0.0764438			0.0521236			0.0526567				0.0294784			0.111443			-0.120713
-0.0154179			-0.0530866			0.0423456				-0.0510164			0.0481673			0.0691126				0.0317497			0.0608344			0.113845
0.0178041			0.0565862			0.0682798				0.0398419			0.110787			0.0295433				-0.0168958			-0.119921			-0.0834327
-0.0188975			0.0722199			0.0478696				0.116895			-0.00578401			0.0511627				0.0992927			0.203585			0.0478149
0.0817994			0.0516661			0.067288				0.0865109			0.0505099			0.0388286				-0.032814			0.185518			0.0494469
0.0471895			0.130767			0.139701				0.0335391			-0.0533436			0.0519987				0.0385661			0.0723467			-0.170404
0.100878			0.0132639			0.17921				0.124116			0.120104			0.0657931				0.0123471			0.152759			0.0690736
-0.052155			0.0148019			0.053071				0.082353			0.083101			0.0589072				0.00460748			0.0381023			0.00269986
0.0474165			0.0305005			0.123493				0.109657			-0.0278085			0.0424421				0.0513344			0.111545			0.0162728
0.0297678			0.0442968			0.0367911				-0.0928222			-0.00787472			0.0475575				0.00243034			0.0223384			0.0720432
-0.00610068			-0.00156424			0.119899				0.0967551			-0.00891729			0.0306299				0.0211132			0.00503355			-0.0418111
0.0699714			0.0325812			0.0245042				0.159204			0.0482462			0.0569276				0.0102278			0.0292163			-0.0272911
0.0544996			0.0566716			0.0898498				0.119579			0.093747			0.0374638				0.0120427			0.135334			0.0917086
0.0225139			0.0896265			0.0734441				0.109325			-0.026842			0.0577638				0.0270431			0.0506093			0.108781
0.0303607			0.0845088			0.0547563				-0.0549739			0.103397			0.0585696				0.0525156			0.154031			0.0933659
0.0478522			0.057788			0.0664295				0.0196702			-0.0508284			0.027741				-0.0804809			0.00976087			0.0860844
0.0381363			0.0174598			0.0971349				0.0151875			0.127483			0.0484546				-0.0426866			0.142785			0.098112
-0.0289057			0.0457304			0.0871167				0.0974782			0.0709139			0.0329754				0.0461986			0.133047			0.0295154
-0.000439228			0.0633786			0.11167				0.024964			0.0540824			0.0345546				0.0394032			0.183933			0.0332377
0.0284163			0.0355772			0.113205				0.0698636			0.0825437			0.0313882				0.036843			0.0908003			-0.0287409
0.0325693			0.050716			0.148679				0.107102			-0.00680975			0.0465678				-0.000370103			-0.000661846			0.070558
0.0534383			0.0619493			0.0993252				0.126078			0.0814261			0.0442847				0.0152962			0.181739			0.0163251
0.0594812			0.0447295			0.0955597				0.0685254			-0.0716411			0.0337539				0.0416094			0.106191			0.00854548
0.0506104			0.0600113			0.0602327				0.0637373			-0.0775241			0.0486711				0.0446117			0.12396			0.0707099
0.0174935			0.0562439			0.0701886				0.0150319			-0.00697009			0.0149503				0.0391185			0.355431			0.0706268
0.0212055			0.000233376			0.0258744				0.0372731			0.0573242			0.0165792				0.0442347			0.429748			-0.00807882
0.0548453			0.103624			0.0505632				-0.0539918			0.0438041			0.0221055				0.00243352			0.961585			0.040393
0.0583717			0.0899699			0.0870863				0.0054374			0.0524897			0.0300166				0.0133688			0.0541937			0.0364204
0.0376274			0.094705			0.125887				0.102616			-0.0566958			0.0565683				0.0250545			0.216405			-0.113637
0.0142915			0.0584275			0.0298012				0.128199			-0.0214275			0.0365553				0.0348448			-0.0296521			-0.253425
0.0723137			0.0597923			0.0864229				0.152984			-0.0457057			0.00659631				0.0326713			0.136887			0.0441682
0.0214404			-0.00134831			0.0216385				0.128654			0.050001			0.0146747				0.0540214			0.00769202			0.101697
0.00578492			0.00188047			0.136916				0.0125467			-0.0665143			0.0481912				-0.0286333			0.110232			0.0304055
0.0197305			0.115613			0.0712468				-0.000460002			0.0168407			0.0405487				0.0426841			0.029911			-0.0767047
0.00724383			0.0172317			0.172925				0.0709222			0.175911			0.0621502				0.0581218			0.092139			0.362143
0.0265815			0.0652172			0.058154				0.16304			0.0963373			0.0160732				-0.0132145			0.0714784			-0.0273699
0.00212633			0.0942713			0.105289				0.126645			0.0981297			0.0537864				0.0132299			0.122661			0.14382
0.0454673			-0.0518141			0.131086				0.0722368			0.12213			0.0512264				-0.0193303			0.180439			-0.0471617
0.0569418			-0.0138374			0.0873708				0.189826			0.101772			0.0402948				-0.0181775			-0.0733384			-0.0537949
0.0531139			0.0234028			0.105671				0.0843096			0.00398956			0.0365273				-0.0081847			-0.0267093			-0.0186431
0.0352142			0.0131914			0.116807				0.126565			0.0691211			0.0316539				0.051018			0.0722749			-0.198971
0.0240408			0.0352513			0.181305				0.0570838			0.0886978			0.0252584				-0.0337471			-0.0885107			0.00525285
0.0276362			0.0390543			0.0739928				0.0767132			0.0987131			0.0105524				-0.0169914			0.0743404			-0.0355762
0.025126			0.0400522			0.106194				0.0698395			0.0888847			0.0255455				-0.0291739			0.0763277			-0.0509919
0.0414025			-0.00528401			0.0786077				-0.0131979			-0.203066			0.0201212				0.0550898			0.0639257			0.0337652
0.0258602			-0.00509859			0.135098				-0.0568041			0.0826324			0.0226782				0.0169581			0.144429			0.0830573
0.0628346			0.0581722			0.144108				0.00659993			0.124688			0.0381214				-0.0376332			-0.0103751			0.0471245
0.0426706			0.0612069			0.258288				0.12752			-0.149305			0.024966				-0.0110825			0.0434141			0.0543957
0.0580984			0.036976			0.133212				0.0974331			0.149246			0.0147117				0.0110993			0.0182255			0.0884024
0.0608762			0.0257252			0.0927145				0.0791352			-0.18663			0.041461				0.0627996			0.064733			0.0368777
0.0642105			0.000488128			0.144512				0.0520653			-0.00542843			0.0330891				0.0986669			-0.00159729			-0.12923
0.00635683			0.030005			0.17187				0.0421419			-0.0886023			0.0447358				0.237488			-0.0625944			0.00332172
0.0791619			0.0294915			0.0472696				0.102692			0.0272325			0.00899321				0.0539979			0.0306847			0.0712489
0.0112464			-0.00454885			0.048705				0.0546215			0.0923983			0.0559582				0.116891			0.0937818			-0.120288
0.045636			0.102388			0.0813993				0.115099			0.10479			0.0488455				0.22896			0.00813808			0.000222398
0.0288821			0.0365266			0.0839997				0.0610552			-0.278795			0.0293787				0.151277			-0.0195855			0.0802591
0.0661854			0.034785			0.0760457				0.100925			0.114884			0.0393071				0.0785912			0.000394871			0.0272742
0.0596967			0.082556			0.0471551				0.129101			-0.0899216			0.0219993				0.157861			-0.101366			0.0487691
0.0254269			0.0586116			0.0303658				0.0992643			0.128103			0.0356766				0.049965			0.0135541			0.0382694
0.0459436			0.11102			0.0654783				0.0430982			0.0345982			0.0573945				0.113269			0.0382791			0.0528261
0.0529646			0.0737325			0.163231				0.00544798			-0.0140924			0.0532354				0.292031			-0.0104844			0.225983
0.0451433			0.0409541			0.261744				0.0947633			0.000203878			0.0438464				0.132161			0.0483729			0.0270273
0.066707			0.0759026			0.152333				0.101557			0.0380601			0.0556534				0.178477			0.0232013			0.0448296
0.048476			-0.0429534			0.124716				0.0300708			-0.0176925			0.0560478				0.329832			0.120226			-0.00094008
0.0174779			0.0756405			0.158997				0.0212652			-0.0514192			0.0441345				0.150077			0.0582769			0.0207738
0.0327599			0.0700837			0.125602				0.0328136			0.0538937			0.0571457				0.164128			0.0337104			0.0508382
-0.00531428			0.0212369			0.173182				0.174811			-0.0155834			0.0529413				0.0988343			0.0986546			0.00938443
0.0150461			0.0727382			0.0833616				0.107759			-0.061925			0.0634697				0.29555			0.0149861			0.189757
0.043653			0.0130942			0.165571				0.0584803			0.0674025			0.057404				0.0883524			0.0361425			-0.0591457
0.0221486			0.0709163			0.197604				0.0214693			-0.0360991			0.0753741				0.0864949			0.0348148			0.0390852
0.0296752			0.118297			0.110818				-0.00297485			0.0322105			0.0318676				-0.041776			0.0346372			-0.00550379
0.00960112			0.0517786			0.0367413				0.0261652			0.0100308			0.0833072				0.364799			0.0834183			0.0597237
0.031517			0.0758093			0.270266				0.117337			-0.137106			0.0467014				-0.0169738			0.10364			0.0917725
0.0272522			0.0481778			0.0828784				0.0871123			0.057872			0.0537214				0.0544747			0.0330058			0.00226012
0.0153902			0.0761254			0.0996801				-0.0636933			0.0920621			0.0577644				0.359658			0.0694524			0.107779
0.0420601			0.148005			0.0373064				0.11			-0.0137445			0.0606846				0.0643042			0.0988491			-0.156683
0.0356656			0.0399793			0.0581902				0.138204			0.136322			0.0680678				0.273674			0.0338991			-0.159768
0.00530265			0.0984476			0.0928046				0.217371			-0.041592			0.0614031				0.346859			0.0312538			-0.0661639
0.029425			0.0864701			0.0794661				0.0581646			-0.0228339			0.0705094				-0.0775472			-0.0704229			0.214721
0.0312557			0.0523916			0.117876				0.45287			-0.0330806			0.0362448				-0.104442			0.0799731			-0.0514896
0.0194219			0.0634808			0.157133				0.121254			0.124131			0.0341114				0.272168			0.0609306			0.0652052
0.0271772			0.102119			0.122619				0.307317			0.00928209			0.0299036				0.313652			0.05465			0.0978752
0.00927663			0.0758033			0.136633				0.450367			0.119172			0.0807022				-0.232728			0.00674236			-0.0256064
0.0117343			0.102328			0.15936				0.176559			0.109342			0.0537595				0.25868			-0.0965461			-0.0671237
0.0326454			0.076135			0.079519				0.331101			0.0779954			0.0281821				0.144159			-0.0959661			0.19918
0.0277889			0.00502436			0.0175405				0.910339			0.137689			0.0402523				0.293531			0.0190699			-0.125
0.0188646			0.0769566			0.102512				0.361748			0.0940202			0.0429261				0.0805094			-0.0207492			0.0120135
0.0360892			0.0814771			0.13696				0.481552			0.111064			0.0636368				0.184413			0.129579			-0.0122772
0.0186771			0.0626845			0.102915				0.425437			0.141206			0.0539322				-0.314253			0.0692095			0.201616
0.0228207			0.107876			0.113325				0.677682			0.0939664			0.0497389				0.0936139			0.0444441			0.101689
0.00135554			0.112088			0.201643				0.517545			0.104007			0.0339207				-0.0140947			0.0231497			0.0335333
-0.00798082			0.0627653			0.0131246				0.544941			0.222129			0.0583413				0.280269			0.00765909			-0.28629
0.000895128			0.0871881			0.0921538				0.339189			-0.00841782			0.0678244				-0.535654			-0.0504625			0.0419282
0.0317535			0.0867564			0.10832				0.387206			0.0208368			0.0565833				-0.137719			0.0976337			0.13572
0.0263671			0.0844175			0.0775851				0.438804			-0.0564817			0.0501712				0.30443			-0.0320449			0.224623
0.0152584			0.0402636			0.0565908				0.519766			0.0422386			0.0600877				0.0973799			0.0172527			-0.0682413
0.0618806			0.0922398			0.101183				0.424699			-0.0251345			0.078972				0.113229			-0.00219808			0.00722945
-0.0234634			0.137937			0.02898				0.416608			-0.0240054			0.0628288				-0.0694234			0.0207155			0.142499
0.0184946			0.0876368			0.00560059				0.580239			-0.0441638			0.0563132				0.224474			-0.0690919			0.090555
0.00415746			0.0893654			0.0175736				0.162483			0.0543235			0.0751735				-0.125235			-0.0535174			0.140726
0.0380484			0.095622			0.0241974				0.21312			-0.0109364			0.0592487				-0.0830884			0.129574			0.133613
0.0153907			0.0423776			0.041137				0.311545			0.0411834			0.0301782				0.380845			0.0325852			0.205269
0.0373319			0.102788			0.110437				0.570848			0.0542511			0.0502055				-0.149531			-0.00691729			0.11461
-0.00691785			0.0744841			0.195205				0.434941			-0.122244			0.049388				0.0113294			0.100135			0.120873
0.0457307			0.093199			0.0748411				0.341941			-0.0140641			0.0391204				0.0699918			-0.0238836			0.133287
-0.00424004			0.0309825			0.120009				0.121055			-0.0299246			0.0416421				0.134684			-0.0384607			0.319293
-0.000734314			0.0615017			0.0534204				0.00380324			0.0981525			0.0109658				0.224626			0.0271445			0.0945808
0.00985109			0.0529885			0.0723451				0.0405775			0.0277514			0.0166079				0.175214			-0.136924			-0.000819099
0.0370374			0.0156309			0.0710488				-0.00187804			-0.0183647			0.0447842				0.106508			0.0321359			0.0396714
0.0115345			0.0535699			0.088125				0.0257347			0.0236625			0.0650361				0.0721961			0.128482			0.0969257
0.00624578			0.0864138			0.0343836				0.0154566			0.0265831			0.0692054				0.334416			-0.00746559			-0.0106793
0.0233515			0.0859803			0.107263				-0.0323274			-0.0272979			0.106787				-0.354486			0.0698502			0.181076
0.0162174			0.0792274			0.0115298				0.0224369			0.0885762			0.0718144				0.159189			0.0656768			-0.025614
0.025688			0.0896708			0.0076418				0.00854085			0.037177			0.0618016				0.0630415			-0.135769			0.0805679
0.0133939			0.0841923			0.0517087				0.0311897			0.0228131			0.0579406				0.431376			0.0102914			0.0877416
-0.00261907			0.0913067			0.0227408				0.0557003			0.0078079			0.0656698				0.294289			0.0445094			0.132964
0.0285627			0.101176			0.0177293				0.0121935			-0.111319			0.0434851				0.171102			-0.0793271			-0.00474316
0.0315278			0.0778518			0.0203732				0.0703725			0.0170876			0.0380843				0.0198382			0.185076			0.0450055
0.0345164			0.0893903			0.0631831				-0.00360312			0.00177482			0.0466067				0.204918			-0.00312329			-0.145551
0.0340161			0.104922			0.091038				0.0428472			0.0178451			0.0452735				0.222687			-0.0867313			0.218744
-0.00986679			0.101991			0.0421881				-0.08014			0.0590475			0.0416225				-0.602697			0.0981587			-0.0345699
0.0155443			0.0783201			0.137201				0.0565167			0.0460111			0.0579226				0.268036			0.12715			0.177814
0.0472621			0.0831851			0.0689845				0.0381801			-0.0798758			0.0266245				0.173757			-0.0254649			0.133837
-0.0120112			0.0720683			0.095769				0.0690109			0.0445054			0.0594402				0.0857455			-0.0670764			0.0717587
0.00836018			0.100856			0.0772869				-0.0202873			-0.0236759			0.0448496				0.225634			0.103095			0.164017
0.02249			0.0774316			0.0720548				0.055397			-0.217047			0.0421537				-0.214956			0.0261836			0.138415
0.0237368			0.124968			0.100709				0.0488668			0.0261697			0.0668266				-0.111261			-0.0569467			0.0423087
0.0399395			0.109206			0.0642359				-0.0139895			-0.0845186			0.056092				0.154484			-0.00445106			0.1198
0.0141281			0.103259			0.0497889				0.0635514			0.197613			0.075733				0.402564			-0.0191105			0.0842061
-0.0177712			0.0931204			0.0801297				0.0515874			0.0113197			0.0622076				0.143315			-0.156722			0.0498861
-0.00254989			0.0700802			0.0952505				0.0194959			-0.125593			0.0727932				0.0974732			0.0304863			-0.137141
0.045547			0.110915			0.0817244				0.0271837			0.0506316			0.0591775				-0.0553258			0.0156578			0.0899198
0.025265			0.118786			0.0656692				0.0363823			0.0384523			0.0601769				0.111908			-0.0594307			-0.00772114
0.00944476			0.0710219			0.0944551				0.0530971			-0.0278496			0.0505874				0.51004			0.0215257			0.0623467
0.0496084			0.055621			0.161152				-0.0836197			0.128014			0.0214159				0.0988729			0.138605			-0.11204
-0.0187799			0.0975145			0.152749				0.00302617			-0.00223049			0.0618071				0.12328			-0.0406831			-0.128641
0.0594524			0.0959353			0.126671				0.0282122			-0.130451			0.0685995				0.186414			-0.0988284			0.0524326
-0.0452533			0.146341			0.100565				0.0242726			0.140203			0.0363452				0.0465555			0.117741			0.175612
0.119959			0.127336			0.153335				0.0537587			-0.0342242			0.0649549				0.364414			0.0870413			0.112734
-0.00751489			0.158372			0.0532402				0.042114			0.0392811			0.0647772				-0.117379			-0.0200635			-0.0668366
-0.0151749			0.0596769			0.101406				0.0270719			0.00388115			0.0835971				-0.211429			-0.140712			0.156614
0.00303013			0.127826			0.0940373				0.136843			-0.22141			0.0524381				0.0612105			0.021957			-0.030029
0.069568			0.0670049			0.185816				0.0768895			0.0292769			0.033907				0.219179			-0.20522			-0.0779225
0.000102871			0.0800606			0.115851				0.0333705			0.16818			0.0629798				-0.166189			-0.147627			-0.0259787
0.103847			0.0988154			0.120296				0.0709351			0.0847061			0.0583499				-0.212968			0.213678			0.0443422
0.054576			0.0820632			0.181505				0.0751214			0.116006			0.0323655				0.01986			0.051829			-0.0336947
0.0879439			0.103403			0.107376				-0.0655734			-0.0348939			0.0295909				0.080398			0.0933055			0.0935791
0.0347583			0.12285			0.0866911				0.0496973			0.0930344			0.0354882				-0.0340618			0.0612529			-0.230105
0.0671101			0.0783099			0.147837				-0.0149062			-0.0134284			0.0871417				0.265183			0.0590769			0.0697401
-0.0984887			0.0972722			0.174748				0.056167			0.0625247			0.0746318				0.00634677			0.0671803			0.117605
-0.0285778			0.115841			0.362905				0.0179488			-0.0741244			0.0829926				1.4644			0.0799164			-0.0476115
-0.00227138			0.0829954			0.190167				0.0215621			0.0111937			0.0648187				0.0386048			-0.00712718			0.0614128
0.0661228			0.161647			0.112077				-0.0341697			-0.0281481			0.0431343				0.00796487			-0.14966			0.0727949
0.106152			0.096796			0.045867				0.125043			-0.0277297			0.0637156				0.0200912			-0.00037162			0.0389707
0.0556494			0.0647537			0.114555				-0.125124			0.0336738			0.0731932				0.0912855			0.0319453			0.183534
0.0804251			0.0684557			0.121773				-0.033287			0.068656			0.049932				0.0627814			0.106142			-0.070112
-0.0846164			0.117962			0.0952613				-0.0300676			0.0827091			0.0397093				0.0296203			0.0189273			-0.145323
0.0922435			0.123698			0.340166				0.0439231			-0.0123917			0.0562998				0.0607726			-0.0459554			-0.0545009
-0.0140639			0.0627343			0.183773				-0.118459			0.00639515			0.0335744				0.115159			0.0775186			0.0888043
-0.0211876			0.110267			0.116093				-0.0188949			0.062581			0.0474039				-0.00660068			0.245823			0.0610593
-0.0498191			0.110551			0.204735				0.145508			0.0792513			0.0464114				0.0253136			0.0631106			-0.0573264
0.0969284			0.0887177			0.173078				-0.0457569			0.0445147			0.0358578				0.0674603			0.252087			0.137602
0.0783938			0.116462			0.119589				-0.0785898			0.0733659			0.0384354				0.016408			0.0339195			-0.0195195
0.00688238			0.0769069			0.320836				-0.135321			0.14271			-0.00602777				0.0554393			0.0422782			0.169437
0.0765584			0.0819029			0.12289				0.0443641			0.0374622			-0.0183147				-0.0139504			0.112503			0.0275826
0.0388625			0.101799			0.154536				0.0828333			0.0221149			-0.00559396				0.0600195			0.0754502			-0.052664
-0.0356699			0.0937879			0.109393				-0.0948292			-0.119362			-0.0357492				-0.012485			0.0638772			0.135983
0.00470995			0.0954397			0.0517027				0.0199078			0.0379866			0.00220628				0.0644685			0.0898276			0.134824
0.00226131			0.077854			0.180815				-0.113017			0.074272			0.037064				0.0316308			0.0532964			-0.0427906
0.0253627			0.064252			0.0999366				0.0999726			0.11679			0.0121913				0.0554036			0.336875			0.0355993
[truncated: 39,319 more rows]
