# Supplementary material for: XLF acts as a flexible connector during non-homologous end joining
Source: eLife. 2020 Dec 8;9:e61920. doi: 10.7554/eLife.61920 (PMC7744095; doi:10.7554/eLife.61920)
Supplement: Figure 3—source data 2. [file elife-61920-fig3-data2.xls]

## Sheet: Sheet1
2020 03 12 Analysis of smFRET experiments from 2020 03 10-11
Condition	Exp Name	Trace #	Event #	SRC Formation Rate
XLF1-245+KBM	20200310_dXLFhssPxlf1245500nM_A10_95thresh	348	2	1.4214e-05
wtXLF	20200311_HSSdXLF_pWTxlf500nM_A2_95thresh	147	53	0.0023199
Buffer	20200311_HSSdXLF_pBuffer_C6_95thresh	316	9	7.7477e-05
XLF1-245+KBM	20200311_HSSdXLF_pxlf1245500nM_D8_95thresh	259	4	5.1681e-05
2020 03 14 Analysis of smFRET experiments from 2020 03 14
Condition	Exp Name	Trace #	Event #	SRC Formation Rate
wtXLF	20200314_HSSdXLFpWTxlf500nM_B5_95thresh	288	82	0.001146
XLF1-245+KBM	20200314_HSSdXLFpXLF1245500nM_C9_95thresh	246	3	7.5498e-05
Buffer	20200314_HSSdXLFpBuffer_D11_95thresh	262	3	4.5862e-05
BUffer	20200314_HSSdXLFpBuffer_E13_95thresh	200	3	6.9943e-05
wtXLF	20200314_HSSdXLFpWTxlf500nM_F15_95thresh	256	132	0.0015953
XLF1-245+KBM	20200314_HSSdXLFpXLF1245_500nM_G17_95thresh	223	4	4.1318e-05
Buffer	20200311_HSSdXLF_pBuffer_C6_95thresh	316	9	7.7477e-05
Buffer	20200314_HSSdXLFpBuffer_D11_95thresh	262	3	4.5862e-05
BUffer	20200314_HSSdXLFpBuffer_E13_95thresh	200	3	6.9943e-05
wtXLF	20200311_HSSdXLF_pWTxlf500nM_A2_95thresh	147	53	0.0023199
wtXLF	20200314_HSSdXLFpWTxlf500nM_B5_95thresh	288	82	0.001146
wtXLF	20200314_HSSdXLFpWTxlf500nM_F15_95thresh	256	132	0.0015953
XLF1-245+KBM	20200310_dXLFhssPxlf1245500nM_A10_95thresh	348	2	1.4214e-05
XLF1-245+KBM	20200311_HSSdXLF_pxlf1245500nM_D8_95thresh	259	4	5.1681e-05
XLF1-245+KBM	20200314_HSSdXLFpXLF1245500nM_C9_95thresh	246	3	7.5498e-05
XLF1-245+KBM	20200314_HSSdXLFpXLF1245_500nM_G17_95thresh	223	4	4.1318e-05
TOTALS		# Molecules	Event #	Ave Formation Rate	SEM
Buffer	3 replicates	778	15	6.44273e-05	9.53404e-06
wtXLF	3 replicates	691	267	0.00168707	0.000341968
XLF1-245+KBM	4 replicates	1076	13	4.56778e-05	1.2696e-05
