# Supplementary material for: XLF acts as a flexible connector during non-homologous end joining
Source: eLife. 2020 Dec 8;9:e61920. doi: 10.7554/eLife.61920 (PMC7744095; doi:10.7554/eLife.61920)
Supplement: Figure 4—figure supplement 3—source data 1. [file elife-61920-fig4-figsupp3-data1.xls]

## Sheet: Sheet1
Joe wants to combine SRC Formation data from NSMB paper and new C-term XLF story on BioRxiv for a talk--- Pasted all relevant data below here. Summarize on the right.
2020 03 12 Analysis of smFRET experiments from 2020 03 10-11
								XLF bioRxiv paper data
Condition	Exp Name	Trace #	Event #	SRC Formation Rate
XLF1-245+KBM	20200310_dXLFhssPxlf1245500nM_A10_95thresh	348	2	1.4214e-05				TOTALS		# Molecules	Event #	Ave Formation Rate	SEM
wtXLF	20200311_HSSdXLF_pWTxlf500nM_A2_95thresh	147	53	0.0023199				Buffer	3 replicates	778	15	6.44273e-05	9.53404e-06
Buffer	20200311_HSSdXLF_pBuffer_C6_95thresh	316	9	7.7477e-05				wtXLF	3 replicates	691	267	0.00168707	0.000341968
XLF1-245+KBM	20200311_HSSdXLF_pxlf1245500nM_D8_95thresh	259	4	5.1681e-05				XLF1-245+KBM	4 replicates	1076	13	4.56778e-05	1.2696e-05
2020 03 14 Analysis of smFRET experiments from 2020 03 14								XLF nsmb 2018 paper
Condition	Exp Name	Trace #	Event #	SRC Formation Rate				HSSdX4_100nMX4L4cd	5 replicates	1026	374	0.00141494	0.000296832
wtXLF	20200314_HSSdXLFpWTxlf500nM_B5_95thresh	288	82	0.001146				HSSdX4_100nMX4(K104E)L4cd	6 replicates	1214	47	0.000125511	3.31599e-05
XLF1-245+KBM	20200314_HSSdXLFpXLF1245500nM_C9_95thresh	246	3	7.5498e-05
Buffer	20200314_HSSdXLFpBuffer_D11_95thresh	262	3	4.5862e-05
BUffer	20200314_HSSdXLFpBuffer_E13_95thresh	200	3	6.9943e-05
wtXLF	20200314_HSSdXLFpWTxlf500nM_F15_95thresh	256	132	0.0015953
XLF1-245+KBM	20200314_HSSdXLFpXLF1245_500nM_G17_95thresh	223	4	4.1318e-05
Buffer	20200311_HSSdXLF_pBuffer_C6_95thresh	316	9	7.7477e-05
Buffer	20200314_HSSdXLFpBuffer_D11_95thresh	262	3	4.5862e-05
BUffer	20200314_HSSdXLFpBuffer_E13_95thresh	200	3	6.9943e-05
wtXLF	20200311_HSSdXLF_pWTxlf500nM_A2_95thresh	147	53	0.0023199
wtXLF	20200314_HSSdXLFpWTxlf500nM_B5_95thresh	288	82	0.001146
wtXLF	20200314_HSSdXLFpWTxlf500nM_F15_95thresh	256	132	0.0015953
XLF1-245+KBM	20200310_dXLFhssPxlf1245500nM_A10_95thresh	348	2	1.4214e-05
XLF1-245+KBM	20200311_HSSdXLF_pxlf1245500nM_D8_95thresh	259	4	5.1681e-05
XLF1-245+KBM	20200314_HSSdXLFpXLF1245500nM_C9_95thresh	246	3	7.5498e-05
XLF1-245+KBM	20200314_HSSdXLFpXLF1245_500nM_G17_95thresh	223	4	4.1318e-05
TOTALS		# Molecules	Event #	Ave Formation Rate	SEM
Buffer	3 replicates	778	15	6.44273e-05	9.53404e-06
wtXLF	3 replicates	691	267	0.00168707	0.000341968
XLF1-245+KBM	4 replicates	1076	13	4.56778e-05	1.2696e-05
2018 02 05 SRC formation rates
											Experiments from 2018 01 25B - 2018 01 28
	WT				Trace Num	Dwell Num	SRC formaiton Rate				tdXLF (wt/wt)									Trace Num	Dwell Num	SRC formaiton Rate		Max min diff
	st_20170921A_20180204analysis				105	68	0.0021926				A_HSSdXLFp500nMpTG454wtwtXLF_Per5_ExpT500ms_R300uWG1mW2_98thresh									245	55	0.001798
	st_20170921C_20180204analysis				295	137	0.0014845				B_HSSdXLFp500nMpTG454wtwt_G1mWR300uWPer5_ExpT500ms3_98thresh									120	43	0.0038933
	st_20170928B_20180204analysis				688	435	0.0015582											Total and Ave		365	98	0.00284565		0.00104765
	st_20171005B_20180204analysis				299	182	0.0017037
	2018 02 18 A_renamed_92thresh_AllTraceTypes_GetSRSCRate				254	138	0.0014818
	2018 02 18B 92thresh_AllTraceTypes_GetSRSCRate				757	593	0.0019428	StdEv	SEM
					2398	1553	0.00172727	0.000286816	0.000143408
	K104E										tdXLF (wt/L68D,L117D)
	st_20170921B_20180204analysis				95	9	0.00020585				B_HSSdXLFp500nMpTG458L68DL117DwtXLF_Per5_ExpT500ms_R300uWG1mW3_98thresh									257	4	7.6388e-05
	st_20170921D_20180204analysis				102	8	0.00018727				A_HSSdXLFp500nMpTG458wtmut_G1mWR300uWPer5_ExpT500ms1_98thresh									188	4	0.00030041
	st_20170927A_20180204analysis				337	54	0.00040889											Total and Ave		445	8	0.000188399		0.000112011
	st_20170927B_20180204analysis				464	66	0.00035103
	st_20170928A_20180204analysis				545	115	0.00049762
	st_20170929A_20180204analysis				288	95	0.00075296
	st_20171005A_20180204analysis				186	39	0.00048712
	st_20171006A_20180204analysis				308	23	0.00017356	StdEv	SEM
					2325	409	0.000383038	0.000198602	7.02164e-05
2018 04 02 New smFRET Dwell Time Experiments
WT					Trace Num	Dwell Num	SRC formaiton Rate
A_20180330_HSSdX4_100nMX4L4cd_G1mWR300uW_P3_Exp1Del13_98thresh					103	28	0.0013308
B_20180330_HSSdX4_100nMX4L4cd_G1mWR300uW_P3_Exp1Del110_98thresh					170	42	0.00084561
C_20180330_HSSdX4_100nMX4L4cd_G1mWR300uW_P3_Exp1Del14_98thresh					160	72	0.0017741
A_20180401_HSSdX4_100nMX4L4cd_G1mWR300uW_P3_Exp1Del15_98thresh					429	100	0.00076879
A_20180401_HSSdX4_100nMX4L4cd_G1mWR300uW_P3_Exp1Del12_98thresh					164	132	0.0023554
								StdEv	SEM
					1026	374	0.00141494	0.000663737	0.000296832
K104E
A_20180330_HSSdX4_100nMX4k104eL4cd_G1mWR300uW_P3_Exp1Del13_98thresh					64	4	6.3524e-05	** lost density fast
B_20180401_HSSdX4_100nMXk104e4L4cd_G1mWR300uW_P3_Exp1Del17_98thresh					632	26	6.6414e-05
B_20180401_HSSdX4k104e_100nMX4L4cd_G1mWR300uW_P3_Exp1Del14_98thresh					130	4	0.00014457
A_20180403_HSSdX4_100nMX4k104eL4cd_G1mWR300uW_P3_Exp1Del13_98thresh					38	4	0.00025786
B_20180403_HSSdX4_100nMX4k104eL4cd_G1mWR300uW_P3_Exp1Del15_98thresh					228	5	4.988e-05
D_20180403_HSSdX4_100nMX4k104eL4cd_G1mWR300uW_P3_Exp1Del19_98thresh					122	4	0.00017082
								StdEv	SEM
					1214	47	0.000125511	8.12248e-05	3.31599e-05
COMBINING K104E Datasets'
K104E
st_20170921B_20180204analysis				95	9	0.00020585
st_20170921D_20180204analysis				102	8	0.00018727
st_20170927A_20180204analysis				337	54	0.00040889
st_20170927B_20180204analysis				464	66	0.00035103
st_20170928A_20180204analysis				545	115	0.00049762
st_20170929A_20180204analysis				288	95	0.00075296
st_20171005A_20180204analysis				186	39	0.00048712
st_20171006A_20180204analysis				308	23	0.00017356
A_20180330_HSSdX4_100nMX4k104eL4cd_G1mWR300uW_P3_Exp1Del13_98thresh				64	4	6.3524e-05
B_20180401_HSSdX4_100nMXk104e4L4cd_G1mWR300uW_P3_Exp1Del17_98thresh				632	26	6.6414e-05
B_20180401_HSSdX4k104e_100nMX4L4cd_G1mWR300uW_P3_Exp1Del14_98thresh				130	4	0.00014457
A_20180403_HSSdX4_100nMX4k104eL4cd_G1mWR300uW_P3_Exp1Del13_98thresh				38	4	0.00025786
B_20180403_HSSdX4_100nMX4k104eL4cd_G1mWR300uW_P3_Exp1Del15_98thresh				228	5	4.988e-05
D_20180403_HSSdX4_100nMX4k104eL4cd_G1mWR300uW_P3_Exp1Del19_98thresh				122	4	0.00017082	STDEV	SEM
				3539	456	0.000272669	0.000203142	5.42921e-05

## Sheet: Combine and Compare
2020 11 24	Source Data for Supp. FIG 5A.
Heterodimer	Replicates
	wt/wt				Date	Trace #	Event #	SRC formaiton Rate
	A_HSSdXLFp75nMXLFhwtwt_per5_expt1_dt2sec_3_95thresh				2020 10 17	141	65	0.0032988
	C_HSSdXLFp75nMXLFhetwtwt_expt1sper5_dt2sec_10_95thresh				2020 10 25	165	67	0.0029161	stddev	std er mean
					Totals	306	132	0.00310745	0.00027061	0.00019135
	wt/noTail
	B_HSSdXLFp75nMXLFhwtdtail_per5_expt1_dt2sec_5_95thresh				2020 10 17	215	29	0.00086598
	H_2ndHSSdXLFp75nMxlfWTdCtail_per5expt1_dt2_newDNA20_95thresh				2020 10 16	146	11	0.00037586
	A_HSSdXLFpXLFmutwt_Expt1Dt2_Per55_95thresh				2020 11 05	366	88	0.00059626
	C_HSSdXLFpXLFmutwt_Expt1Dt2_Per59_95thresh				2020 11 05	463	55	0.00031499
	A_HSSdXLFpmutwt_expt1sPer5Dt2sec_2_95thresh				2020 11 06	201	39	0.00093123	stddev	std er mean
					Totals	1391	222	0.000616864	0.000278622	0.000124603
	NoTail/NoTail
	C_oldHSSdXLFp75nMh10xlfctail_per5_expt1_dt2sec_7_95thresh				2020 10 17	41	1	0.00014355
	B_HSSdXLFp75nMH10XLF1226_expt1sper5_dt2sec_8_95thresh				2020 10 25	68	2	0.00016617
	E_HSSdXLFp75nMh10XLF1226_expt1sper5_dt2sec_16_95thresh				2020 10 25	155	7	0.00022794
	B_HSSdXLFpXLFmutmut_Expt1Dt2_Per57_95thresh				2020 11 05	298	3	4.2093e-05
	B_HSSdXLFpmutmut_expt1sPer5Dt2sec_4_95thresh				2020 11 06	436	3	2.378e-05	stddev	std er mean
					Totals	998	16	0.000120707	8.61142e-05	3.85114e-05
