# Supplementary material for: XLF acts as a flexible connector during non-homologous end joining
Source: eLife. 2020 Dec 8;9:e61920. doi: 10.7554/eLife.61920 (PMC7744095; doi:10.7554/eLife.61920)
Supplement: Figure 6—source data 1. [file elife-61920-fig6-data1.xlsx]

## Sheet: Sheet1
		FACS date: 10/4/2019												Compilation of data in column J		10/4/2019	10/21/2019	10/28/2019
XLF-/- EJ7GFP mESCs; 900+901 = sgRNA/Cas9 expression vectors		Sample ID	File #	%FSC/SSC (Gating for cells)	%GFP, based on the FSC/SSC gate & rounded by the instrument software	#GFP+ / 20K cells, based on the FSC/SSC gate	Frequency of GFP+ based on # of GFP+ / 20K cells	Column H, Relative to average parallel GFP transfection control	Frequency in Column I, converted to percentage (*100)					EV (empty vector)		0.163617	0.18622	0.0410172
900+901	EV (JS74)	1	3	62.22	0.06	11	0.00055	0.00163617	0.163617							0.133869	0.116387	0.184578
		2	4	64.98	0.04	9	0.00045	0.00133869	0.133869					1191	pSC70 (WT)	52.6402	25.419	69.8523
																50.6322	24.7672	74.918
														1192	pSC71	42.2133	34.6369	56.009
900+901	1191	5	7	62.32	17.7	3539	0.17695	0.526402	52.6402							37.4386	39.8045	57.8958
		6	8	61.39	17.02	3404	0.1702	0.506322	50.6322					1193	pSC72	41.4845	39.6415	61.2592
900+901	1192	7	9	60.34	14.15	2838	0.1419	0.422133	42.2133							45.0692	40.4795	58.9007
		8	10	69.87	12.58	2517	0.12585	0.374386	37.4386					1194	pSC73	6.96118	3.21229	1.33306
900+901	1193	9	11	66.84	13.94	2789	0.13945	0.414845	41.4845							8.96921	2.67691	1.1895
		10	12	71.09	15.15	3030	0.1515	0.450692	45.0692					1197	pSC77	14.7702	3.53818	26.2305
900+901	1194	11	13	69.74	2.34	468	0.0234	0.0696118	6.96118							15.4098	4.56238	27.297
		12	14	62.39	3.02	603	0.03015	0.0896921	8.96921					1198	pSC78	8.44861	5.28399	11.3413
																8.7461	5.23743	10.5619
														STATS: Unpaired T-Test with Holm-Sidak Correction (performed with the data above, using Prism, analysis copied here).
900+901	1197	17	19	68.34	4.96	993	0.04965	0.147702	14.7702						Significant?	P value	Mean1	Mean2	Difference	SE of difference	t ratio	df	Adjusted P Value
		18	20	63.84	5.18	1036	0.0518	0.154098	15.4098					WT vs. 77/1-243KBM	Yes	0.00506357	49.7	15.3	34.4	9.627	3.574	10	0.0151139
900+901	1198	19	21	63.19	2.84	568	0.0284	0.0844861	8.44861					WT vs. 78/1-286	Yes	0.000796331	49.7	8.27	41.43	8.748	4.736	10	0.00318152
		20	22	62.76	2.94	588	0.0294	0.087461	8.7461					WT vs. 71/WTWT	No	0.610119	49.7	44.67	5.038	9.572	0.5264	10	0.847993
GFP expression vector	EV (JS74)	21	23	62.16	34.89	6979	Average parallel GFP transfection control:	0.33615						WT vs. 72/LinkWT	No	0.846324	49.7	47.81	1.899	9.548	0.1989	10	0.847993
		22	24	62.79	32.34	6469								WT vs. 73/LinkDel	Yes	0.000402466	49.7	4.057	45.65	8.782	5.198	10	0.00201071
	UT (untransfected)	23	1	70.06	0.01	1
		24	2	62.65	0	0
		FACS date: 10/21/2019
XLF-/- EJ7GFP mESCs; 900+901 = sgRNA/Cas9 expression vectors		Sample ID	File #	%FSC/SSC (Gating for cells)	%GFP, based on the FSC/SSC gate & rounded by the instrument software	#GFP+ / 20K cells, based on the FSC/SSC gate	Frequency of GFP+ based on # of GFP+ / 20K cells	Column H, Relative to average parallel GFP transfection control	Frequency in Column I, converted to percentage (*100)
900+901	EV (JS74)	1	48	57.9	0.04	8	0.0004	0.0018622	0.18622
		2	49	52.52	0.03	5	0.00025	0.00116387	0.116387
900+901	1191	5	54	50.43	5.46	1092	0.0546	0.25419	25.419
		6	55	49.72	5.32	1064	0.0532	0.247672	24.7672
900+901	1192	7	56	49.28	7.44	1488	0.0744	0.346369	34.6369
		8	57	51.28	8.55	1710	0.0855	0.398045	39.8045
900+901	1193	9	58	50.22	8.52	1703	0.08515	0.396415	39.6415
		10	59	45.71	8.7	1739	0.08695	0.404795	40.4795
900+901	1194	11	60	49.74	0.69	138	0.0069	0.0321229	3.21229
		12	61	50.04	0.57	115	0.00575	0.0267691	2.67691
900+901	1197	17	66	49.6	0.76	152	0.0076	0.0353818	3.53818
		18	67	48.02	0.98	196	0.0098	0.0456238	4.56238
900+901	1198	19	68	48.77	1.14	227	0.01135	0.0528399	5.28399
		20	69	48.72	1.13	225	0.01125	0.0523743	5.23743
GFP expression vector	EV (JS74)	21	70	46.94	21.56	4311	Average parallel GFP transfection control:	0.2148
		22	71	45.47	21.4	4279
	UT (untransfected)	23	50	33.77	0	0
		24	51	42.86	0	0
		FACS date: 10/28/2019
XLF-/- EJ7GFP mESCs; 900+901 = sgRNA/Cas9 expression vectors		Sample ID	File #	%FSC/SSC (Gating for cells)	%GFP, based on the FSC/SSC gate & rounded by the instrument software	#GFP+ / 20K cells, based on the FSC/SSC gate	Frequency of GFP+ based on # of GFP+ / 20K cells	Column H, Relative to average parallel GFP transfection control	Frequency in Column I, converted to percentage (*100)
900+901	EV (JS74)	1	15	68.01	0.01	2	0.0001	0.000410172	0.0410172
		2	16	72	0.04	9	0.00045	0.00184578	0.184578
900+901	1191	5	19	70.83	17.03	3406	0.1703	0.698523	69.8523
		6	20	69.96	18.27	3653	0.18265	0.74918	74.918
900+901	1192	7	21	69.14	13.66	2731	0.13655	0.56009	56.009
		8	22	70.92	14.12	2823	0.14115	0.578958	57.8958
900+901	1193	9	23	69.46	14.94	2987	0.14935	0.612592	61.2592
		10	24	66.17	14.36	2872	0.1436	0.589007	58.9007
900+901	1194	11	25	67.39	0.33	65	0.00325	0.0133306	1.33306
		12	26	66.66	0.29	58	0.0029	0.011895	1.1895
900+901	1197	17	31	64.37	6.4	1279	0.06395	0.262305	26.2305
		18	32	64.19	6.65	1331	0.06655	0.27297	27.297
900+901	1198	19	33	65.11	2.77	553	0.02765	0.113413	11.3413
		20	34	57.97	2.57	515	0.02575	0.105619	10.5619
GFP expression vector	EV (JS74)	21	35	59.65	24.14	4828	Average parallel GFP transfection control:	0.2438
		22	36	54.5	24.62	4924
	UT (untransfected)	23	13	23.06	0	0
		24	14	49.97	0	0
