# Supplementary material for: XLF acts as a flexible connector during non-homologous end joining
Source: eLife journal article supplement (doi:10.7554/elife.61920), 2020-12-08
Supplement: figures [file elife-61920-figures-v2.pdf]

---

## Figures and figure supplements

XLF acts as a flexible connector during non-homologous end joining

**Sean M Carney *et al***

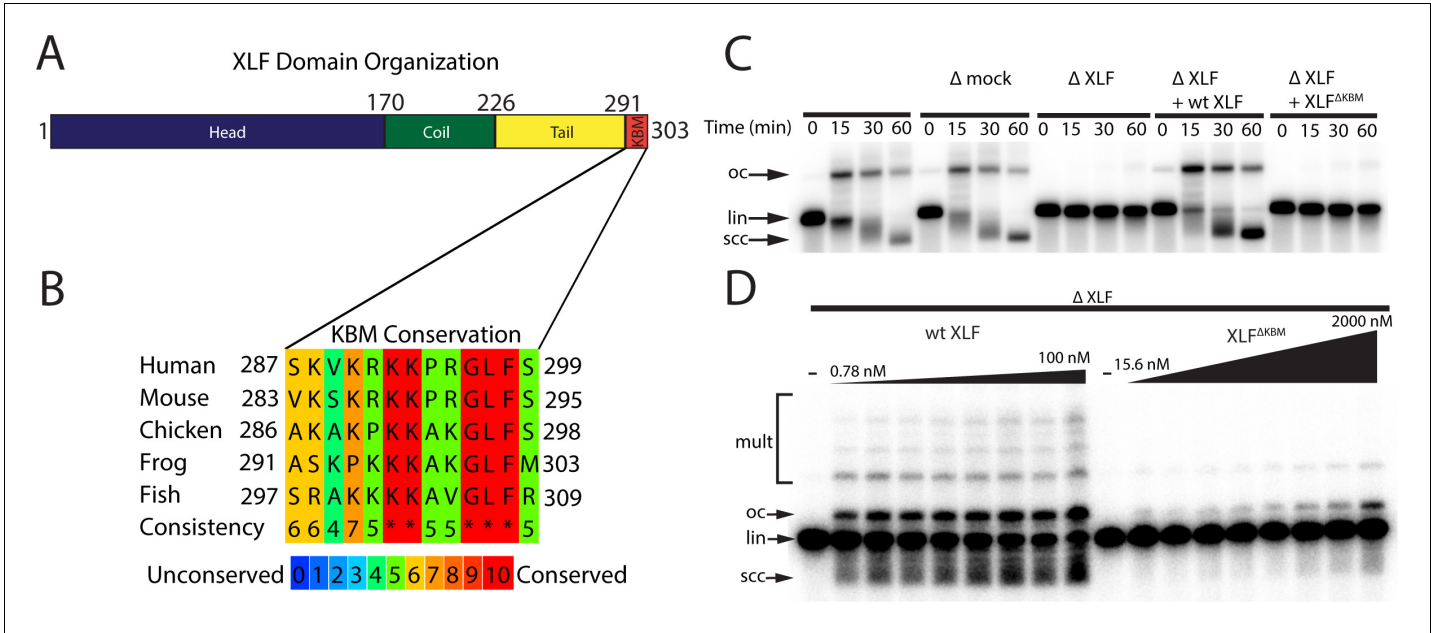

**Figure 1.** The Ku binding motif (KBM) of XLF is critical for end joining in *Xenopus* egg extract. (A) A schematic of the domain organization of XLF. The residue number at the boundary of each region is shown. (B) A protein sequence alignment of the KBM from human (*Homo sapiens* UniProt ID Q9H9Q4), mouse (*Mus musculus* UniProt ID Q3KNJ2), chicken (*Gallus gallus* UniProt ID F1NVP8), frog (*Xenopus laevis* see note below), and fish (*Danio rerio* UniProt ID Q6NV18). The *Xenopus laevis* XLF sequence and translation start site was determined previously by immunoprecipitation from extract and subsequent trypsin digestion and analysis by mass spectrometry (Graham et al., 2016). The alignment was performed using PRALINE multiple sequence alignment and its default settings (Simossis and Heringa, 2005). A colored scale shows the degree of conservation. (C) Ensemble time course end joining assay in either mock-depleted (immunodepletion with non-specific rabbit IgG) or XLF-depleted *Xenopus* egg extract. Recombinant wild-type (wt) XLF and XLF <sup>$\Delta$ KBM</sup> were added back at 75 nM final concentration. DNA species: scc, supercoiled closed circular; lin, linear; oc, open circle. (D) Ensemble end point titration end joining assay in *Xenopus* egg extract. XLF-depleted extract was supplemented with recombinant protein, either wt XLF or XLF <sup>$\Delta$ KBM</sup>, at varying concentrations. The reactions were stopped after 20 min. DNA species: scc, supercoiled closed circular; lin, linear; oc, open circle; mult, multimer.

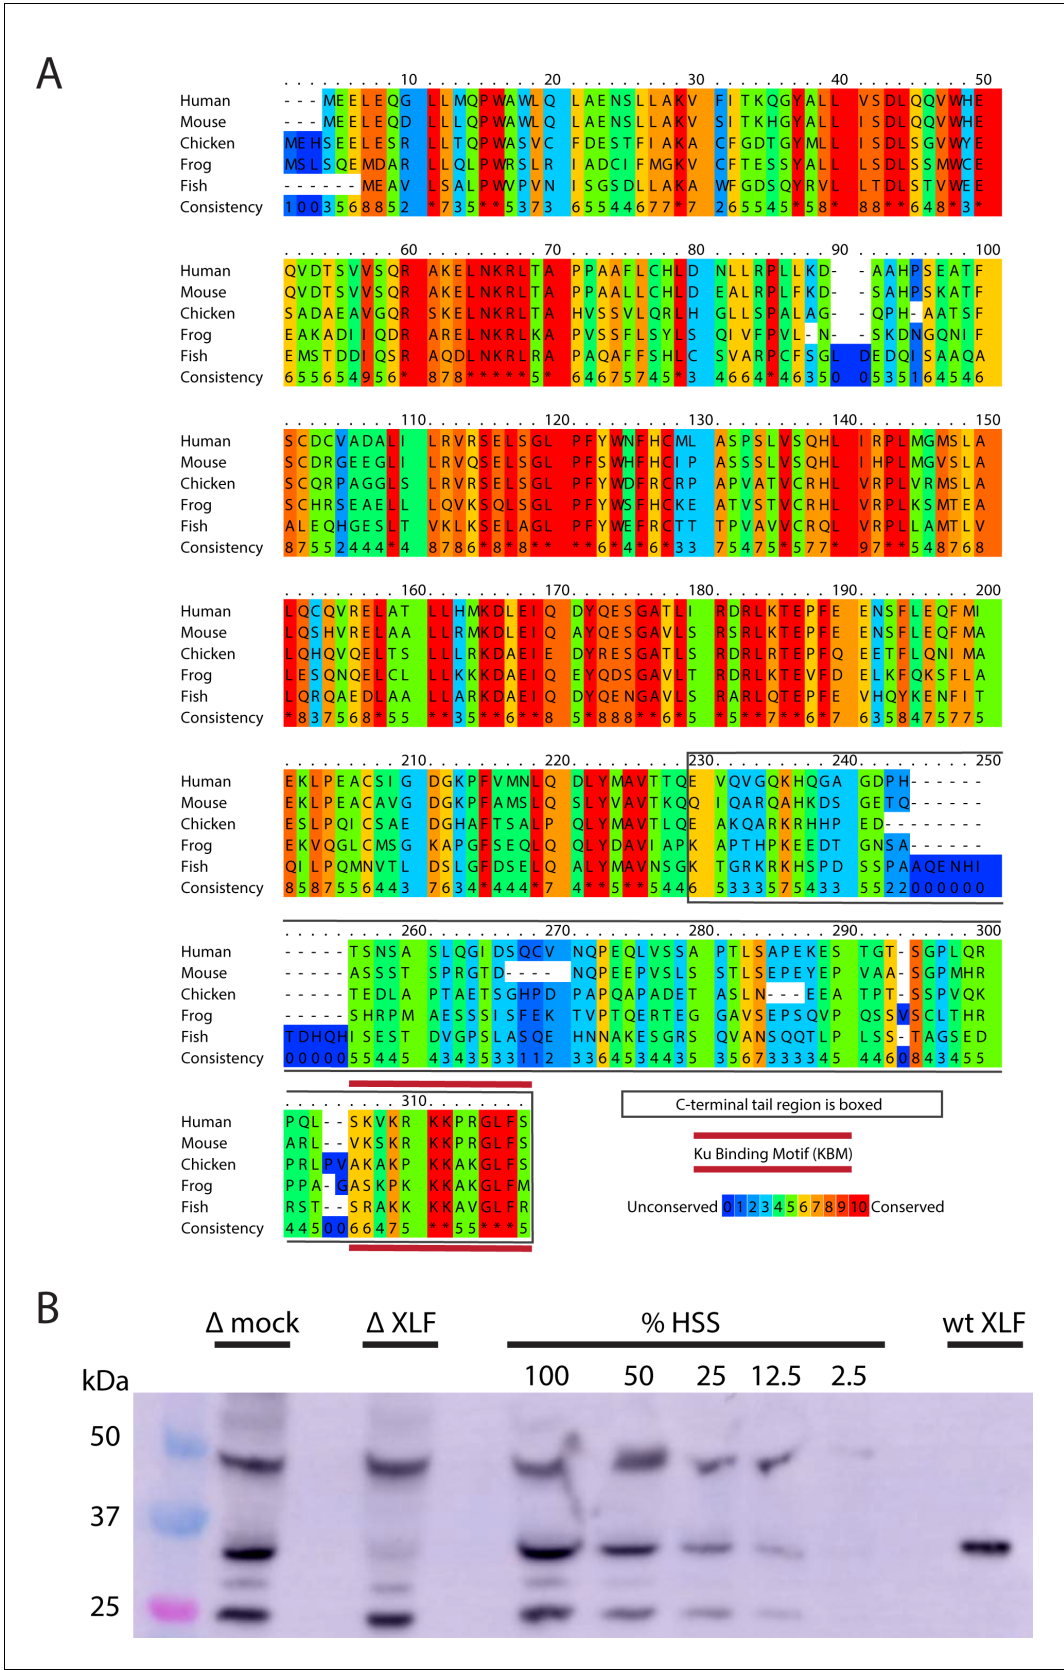

**Figure 1—figure supplement 1.** *Xenopus laevis* XLF is evolutionarily conserved and can be depleted from egg extract. (A) A protein sequence alignment of XLF from human (*Homo sapiens* UniProt ID Q9H9Q4), mice (*Mus musculus* UniProt ID Q3KNJ2), chicken (*Gallus gallus* UniProt ID F1NVP8), Figure 1—figure supplement 1 continued on next page

## Figure 1—figure supplement 1 continued

frog (*Xenopus laevis* see note), and fish (*Danio rerio* UniProt ID Q6NV18). The *Xenopus laevis* sequence and translation start site was determined previously by immunoprecipitation from extract and subsequent trypsin digestion and analysis by mass spectrometry (**Graham et al., 2016**). The alignment was performed using PRALINE multiple sequence alignment and its default settings (**Simossis and Heringa, 2005**). A colored scale shows the degree of conservation. The C-terminal tail is boxed in gray, and the KBM is highlighted by a red bar above and below the sequences. (B) Western blotting for XLF showing its presence in extract and its relative absence in XLF-depleted extract. Unidentified cross-reactive proteins from egg extract are also visible, but the band corresponding to XLF is the only one where we see significant loss of signal in the XLF-depleted extract. Purified recombinant wt XLF (87 nM here) runs at the same molecular weight as the endogenous XLF from extract.

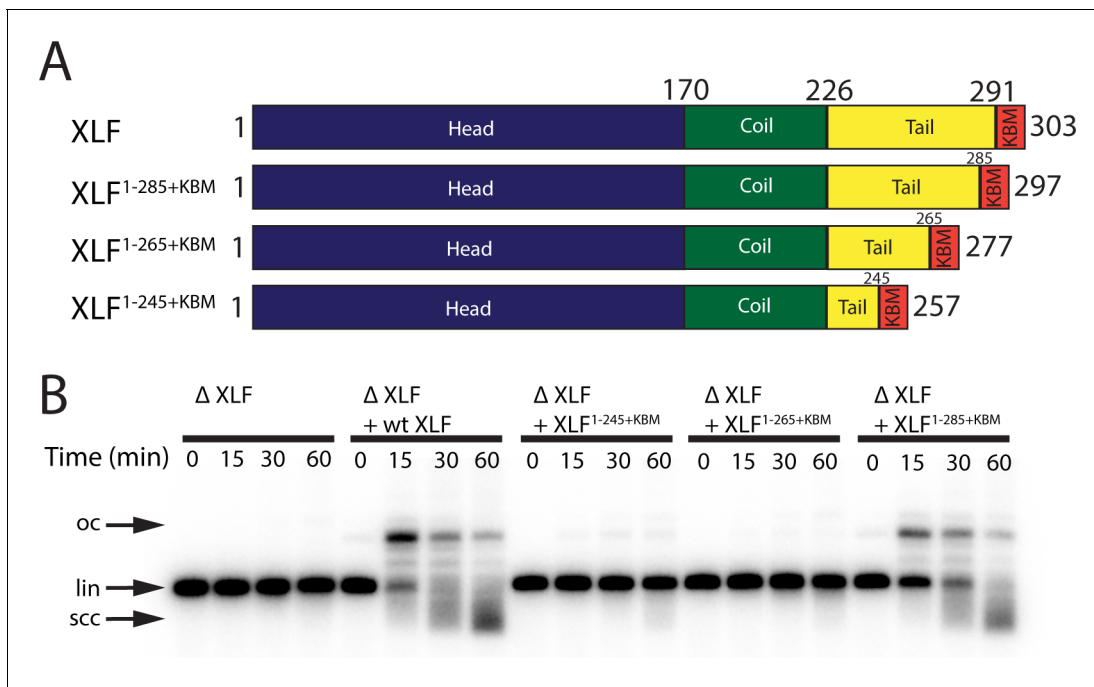

**Figure 2.** The tail region of XLF is essential for DNA end joining. **(A)** Schematics of the domain organization of wt XLF and truncation mutants (XLF<sup>1-285+KBM</sup>, XLF<sup>1-265+KBM</sup>, and XLF<sup>1-245+KBM</sup>). The residue number at the boundary of each region of the protein is indicated. **(B)** Ensemble time course end joining assay in XLF-depleted *Xenopus* egg extract. Recombinant wt XLF, XLF<sup>1-285+KBM</sup>, XLF<sup>1-265+KBM</sup>, and XLF<sup>1-245+KBM</sup> were added back at 75 nM final concentration to their respective reaction samples. DNA species: scc, supercoiled closed circular; lin, linear; oc, open circle.

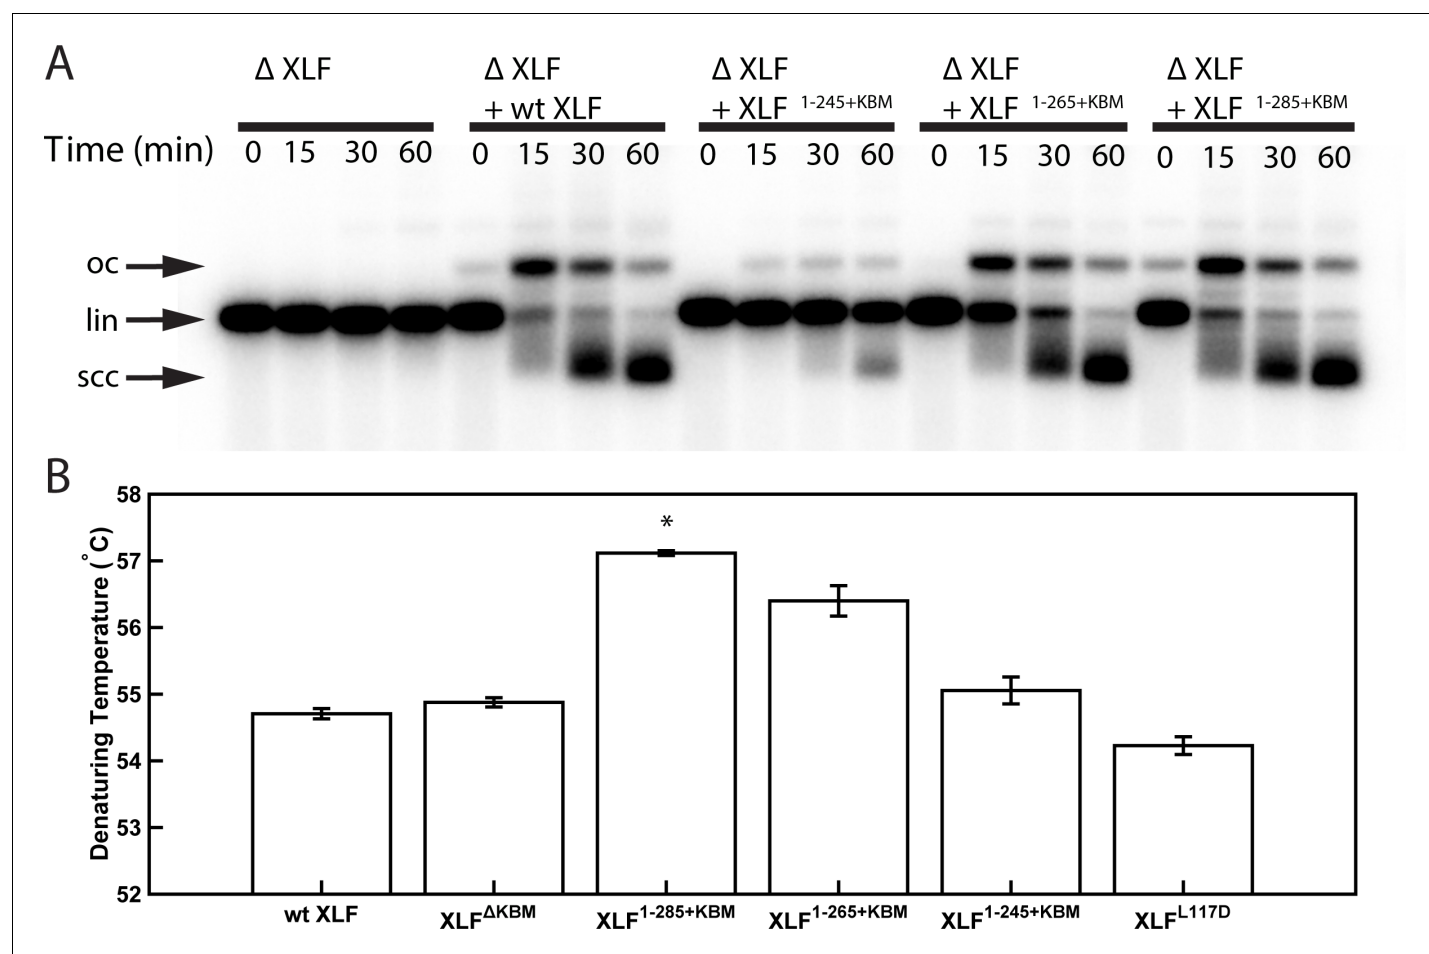

**Figure 2—figure supplement 1.** Characterization of XLF truncation mutants. (A) Ensemble time course end joining assay in XLF-depleted *Xenopus* egg extract. Recombinant wt XLF, XLF<sup>1-285+KBM</sup>, XLF<sup>1-265+KBM</sup>, and XLF<sup>1-245+KBM</sup> were added back to their respective reaction samples at 500 nM final concentration. DNA species: scc, supercoiled closed circular; lin, linear; oc, open circle. (B) Denaturing temperatures of XLF constructs as measured by differential scanning fluorimetry. The average of two replicates is shown with error bars representing the minimum and maximum. Only XLF<sup>1-285+KBM</sup> had a denaturing temperature statistically different from wt XLF ( $p=0.0066$ ), while the denaturing temperature of the other constructs (XLF<sup>ΔKBM</sup>  $p=0.2451$ , XLF<sup>1-265+KBM</sup>  $p=0.615$ , XLF<sup>1-245+KBM</sup>  $p=0.3091$ , XLF<sup>L117D</sup>  $p=0.1172$ ) were not statistically different from that of wt XLF as determined by a two-tailed, unpaired *t* test with unequal variance and the Bonferroni correction. The range of denaturing temperatures was less than 3°C, suggesting no substantial changes in protein folding or stability.

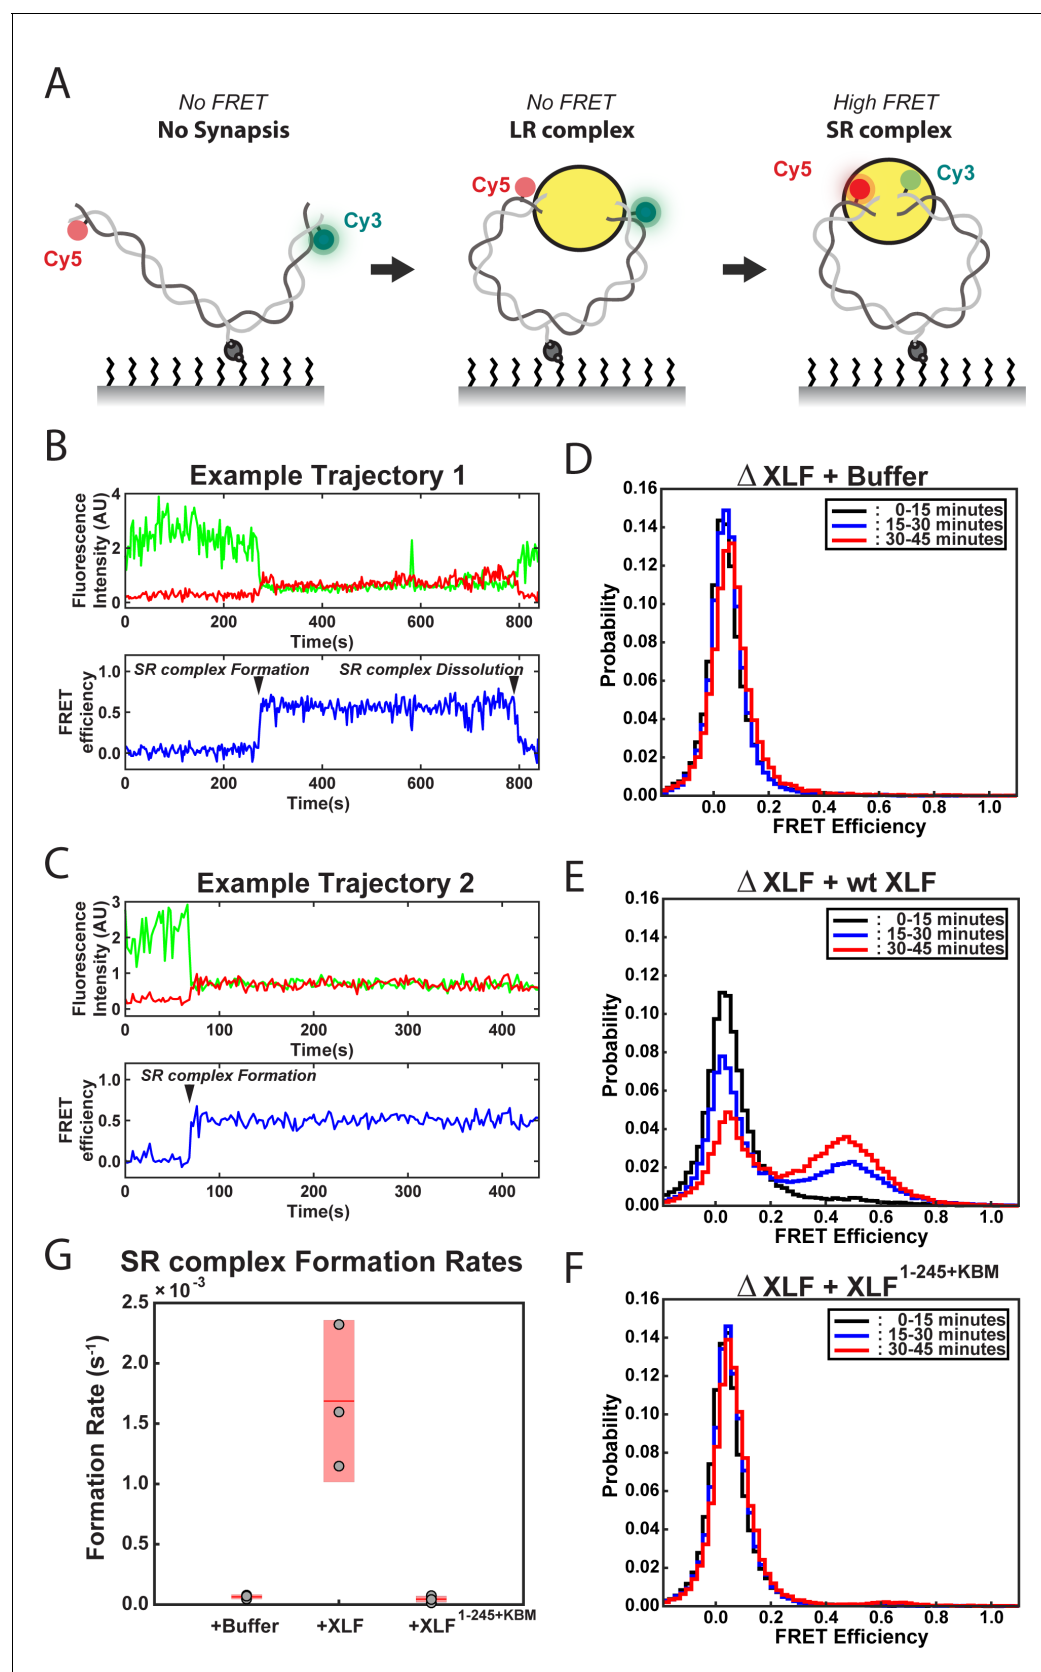

**Figure 3.** DNA end synapsis requires the tail of XLF. (A) Schematic of the FRET-labeled DNA substrate immobilized in the flow cell via biotin-streptavidin interactions. In the absence of egg extract the DNA substrate exhibits no FRET. When the LR complex forms, the DNA ends are not

Figure 3 continued on next page

*Figure 3 continued*

positioned close enough together for energy transfer from Cy3 to Cy5 even though the ends are co-localized within the NHEJ synaptic complex (**Graham et al., 2016**). Upon formation of the SR complex, FRET between the fluorophores on opposing DNA ends can be observed. (**B,C**) Example trajectories that contain SR complex formation events. Donor and acceptor fluorescence intensity are shown in green and red, respectively. The corresponding FRET efficiency from each trace is shown in blue in a separate trajectory below. (**D, E, F**) Normalized FRET histograms for each experimental condition accumulated over a 15-min time window. Data from each 15 min field of view is represented by a separate curve. (**G**) Plot of SR complex formation rates. For each condition, individual replicates are plotted as gray circles, and the mean is represented as dark red horizontal line. The 95% confidence interval is represented for each condition as a light red rectangle centered on the mean. This plot was generated using the `notBoxPlot` MATLAB function (**Campbell, 2020**).



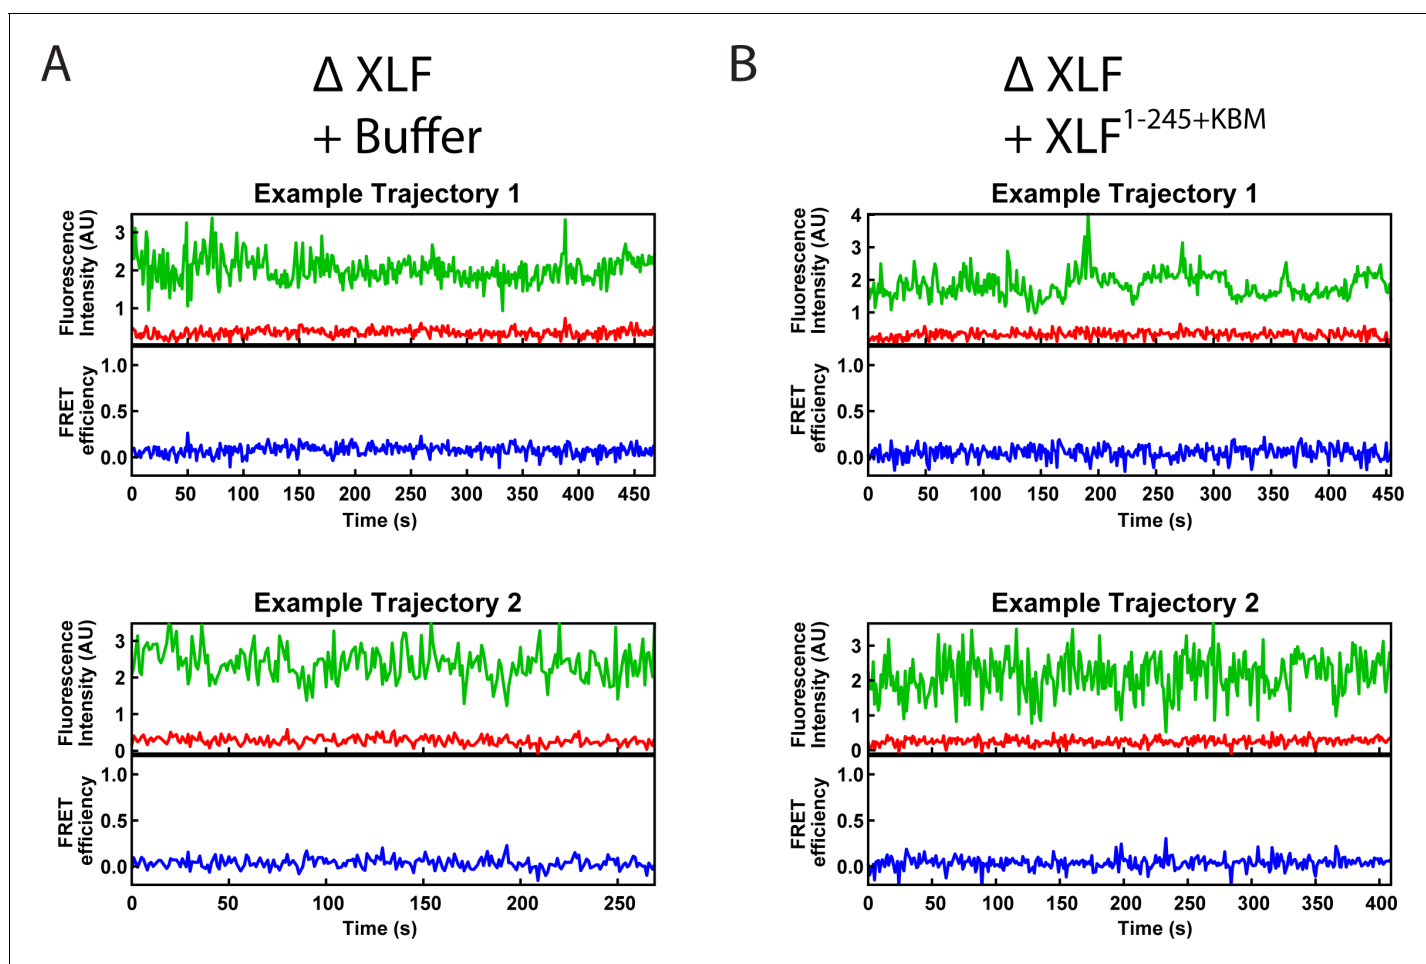

**Figure 3—figure supplement 1.** Example smFRET trajectories. (A, B) Example trajectories from the smFRET SR Complex formation assay for the  $\Delta$ XLF + Buffer and the  $\Delta$ XLF + XLF<sup>1-245+KBM</sup> conditions. Donor and acceptor fluorescence intensity are shown in green and red, respectively. The corresponding FRET efficiency from each trace is shown in blue in a separate trajectory below.

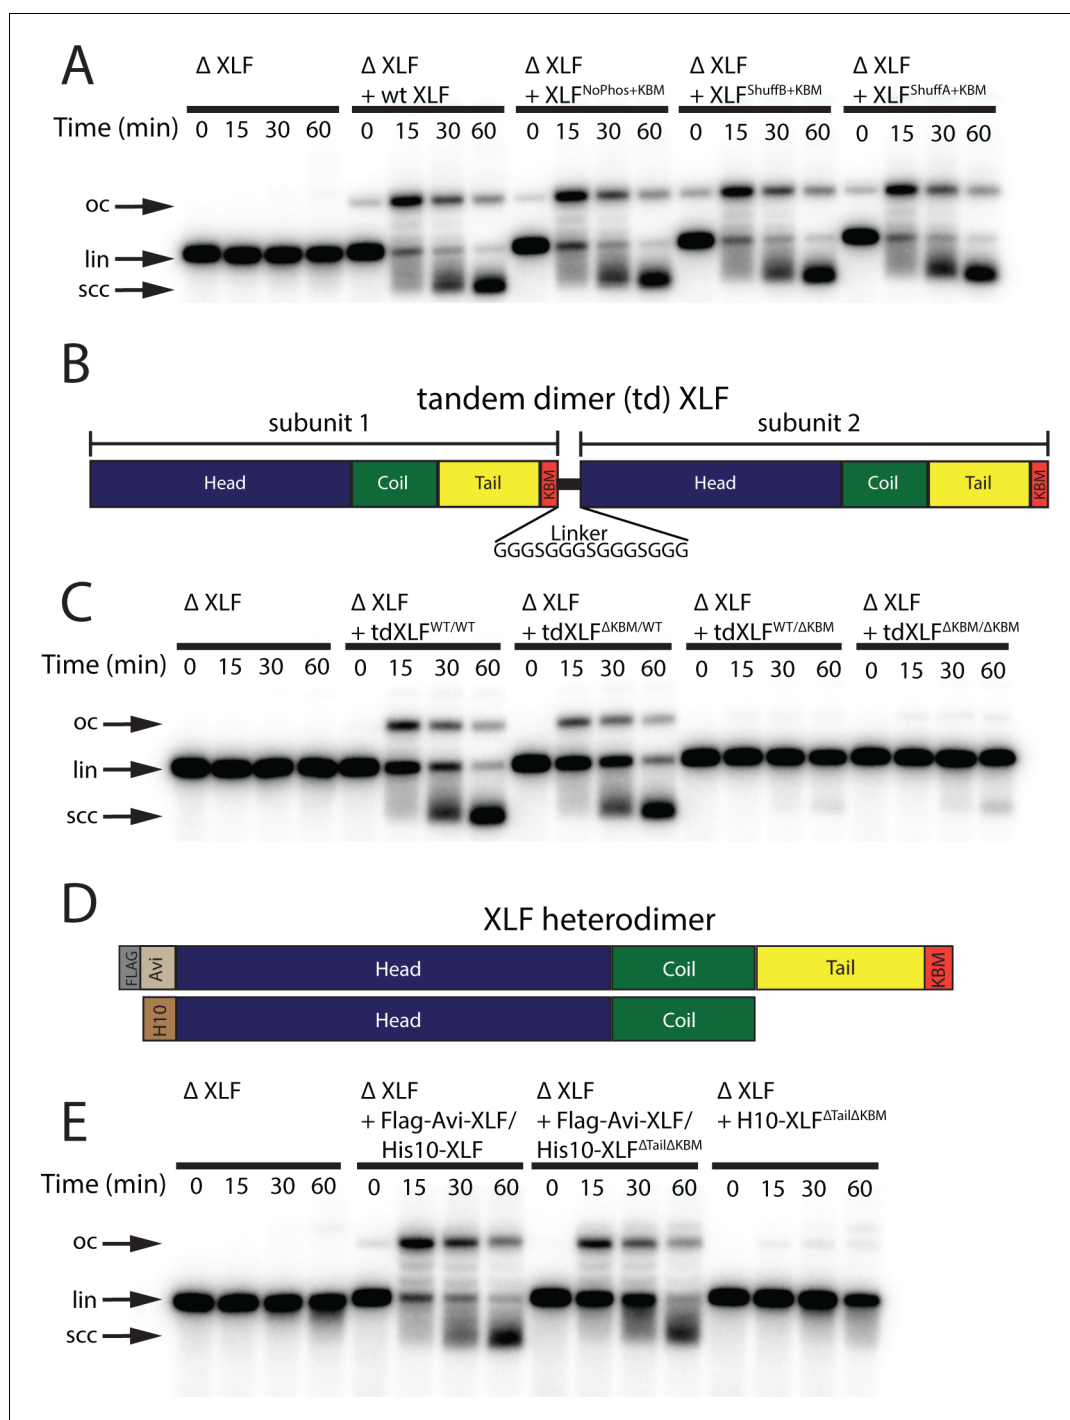

**Figure 4.** Requirements of the XLF tail in end joining. (A) Ensemble time course end joining assay in XLF-depleted *Xenopus* egg extract. Recombinant wt XLF, XLF<sup>NoPhos+KBM</sup>, XLF<sup>ShuffB+KBM</sup>, and XLF<sup>ShuffA+KBM</sup> were added back at 75 nM to their respective reaction samples. DNA species: scc, supercoiled closed circular; lin, linear; oc, open circle. (B) Schematic of the tandem dimer (td) XLF construct. (C) Ensemble time course end joining assay in XLF-depleted *Xenopus* egg extract. Recombinant tdXLF<sup>WT/WT</sup>, tdXLF <sup>$\Delta$ KBM/WT</sup>, tdXLF<sup>WT/ $\Delta$ KBM</sup>, and tdXLF <sup>$\Delta$ KBM/ $\Delta$ KBM</sup> were added back at 50 nM final concentration to their respective reaction samples. DNA species: scc, supercoiled closed circular; lin, linear; oc, open circle. (D) Schematics of the individual subunits coexpressed to form the XLF heterodimer, Flag-Avi-XLF/His10-XLF <sup>$\Delta$ Tail $\Delta$ KBM</sup>. (E) Ensemble time course end joining assay in XLF-depleted *Xenopus* egg extract. Recombinant heterodimers (Flag-Avi-XLF/His10-XLF and Flag-Avi-XLF/His10-XLF <sup>$\Delta$ Tail $\Delta$ KBM</sup>) and His10-XLF <sup>$\Delta$ Tail $\Delta$ KBM</sup> were added back at 75 nM final concentration to their respective reaction samples. DNA species: scc, supercoiled closed circular; lin, linear; oc, open circle.

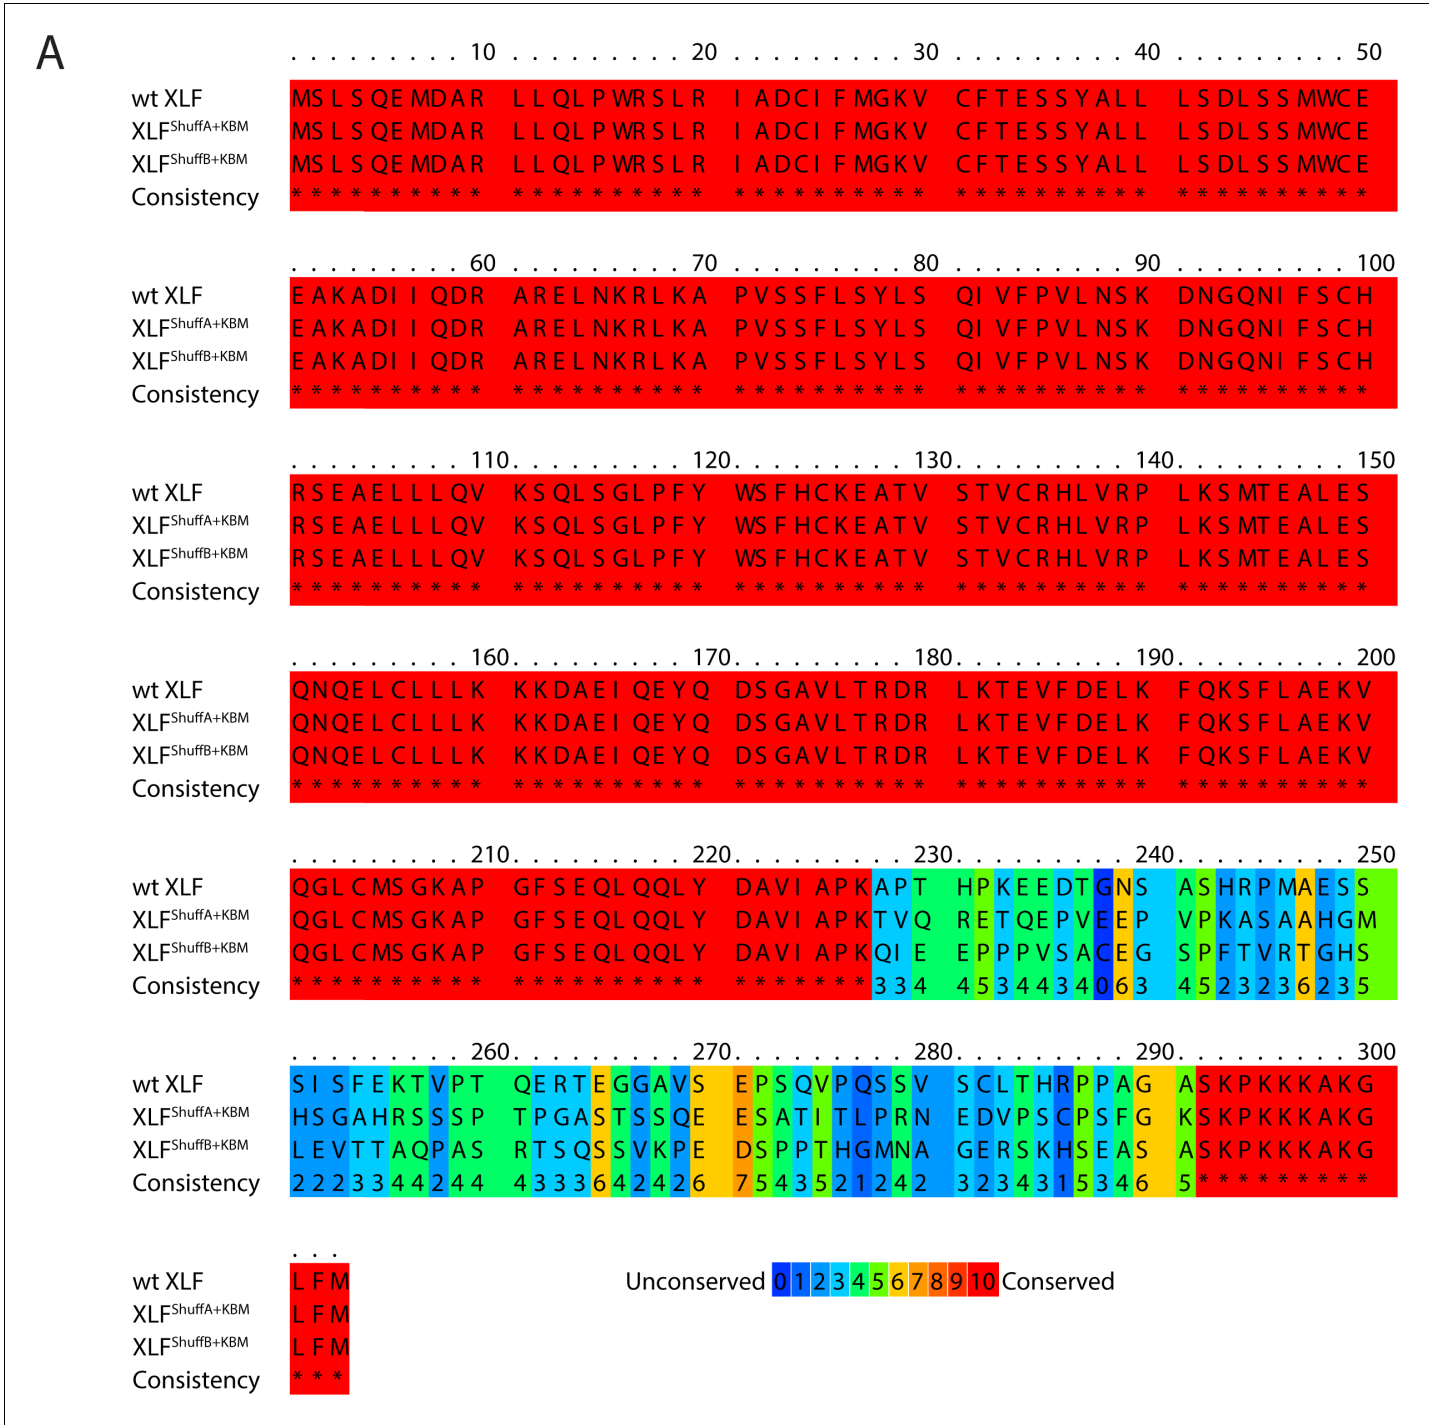

**Figure 4—figure supplement 1.** Sequence alignment of XLF shuffled tail mutants. **(A)** Protein sequence alignment of wt XLF, XLF<sup>ShuffA+KBM</sup>, and XLF<sup>ShuffB+KBM</sup>. The alignment was performed using PRALINE multiple sequence alignment (*Simossis and Heringa, 2005*). Gap penalties were altered to prevent gaps in the alignment.

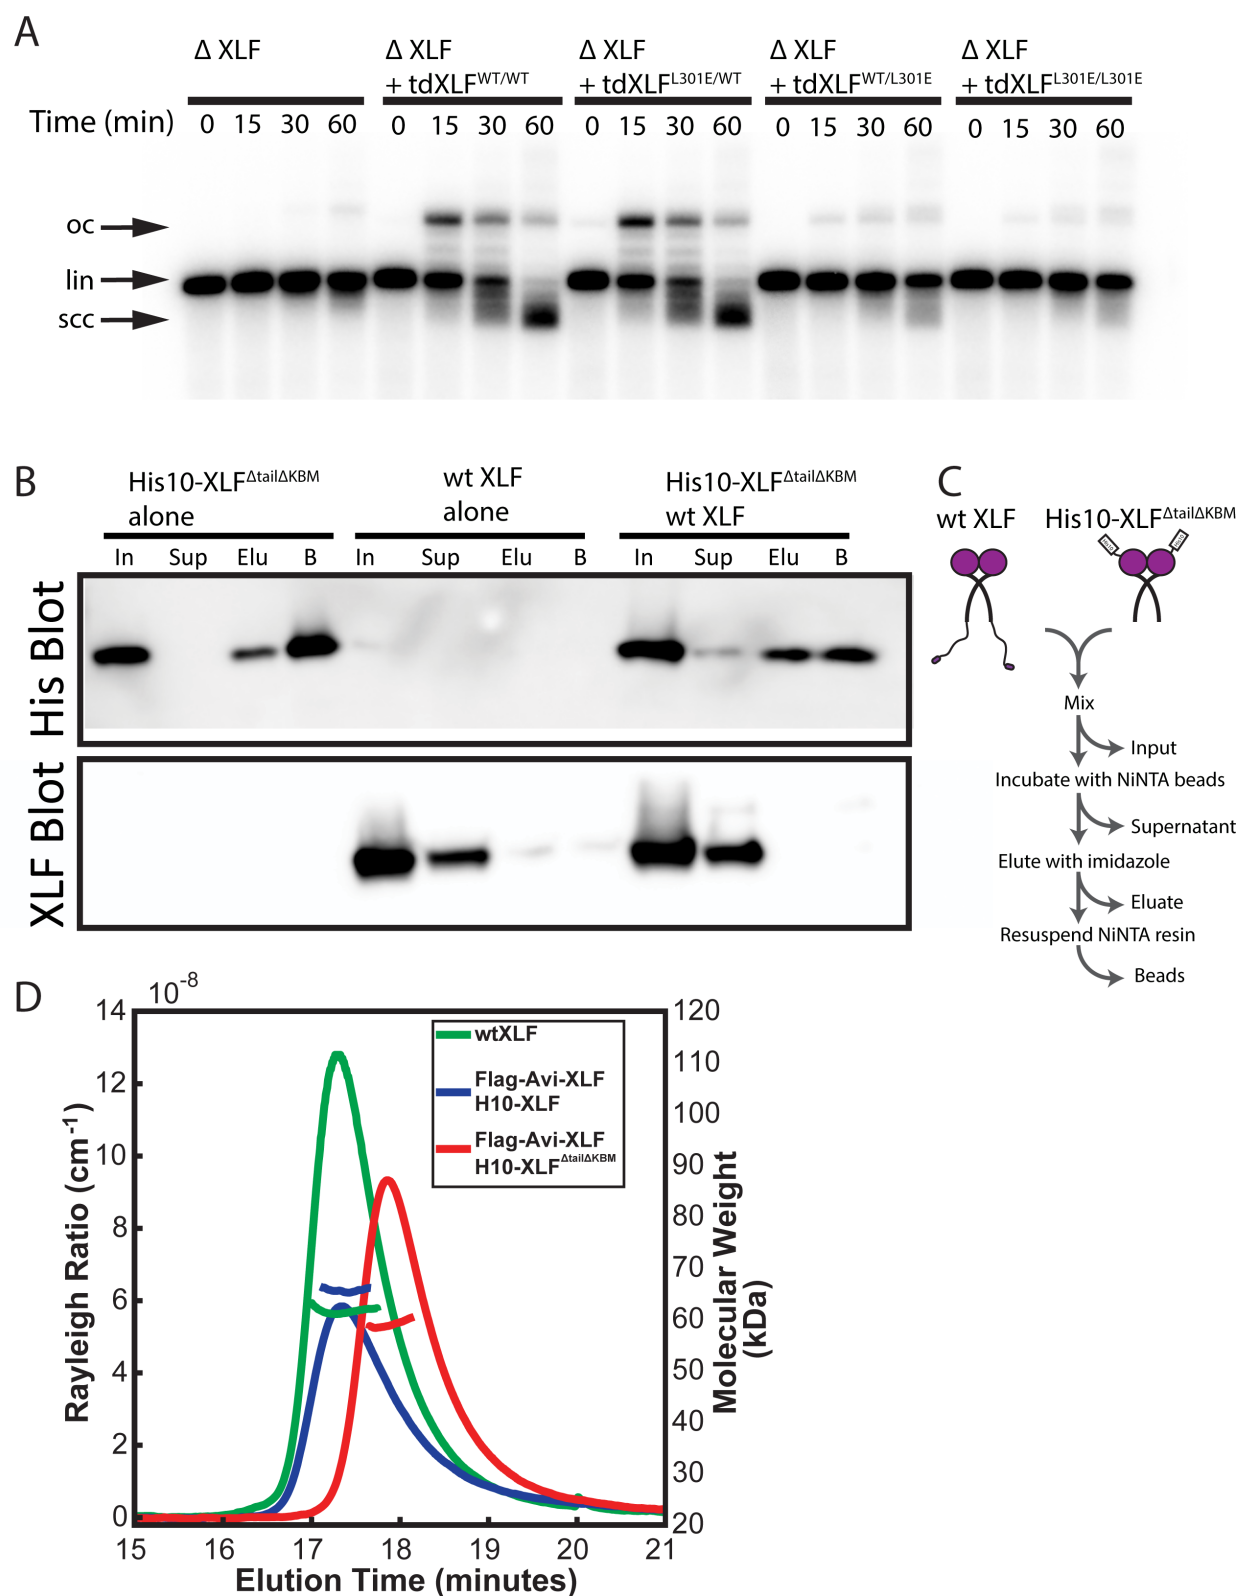

**Figure 4—figure supplement 2.** Characterization of the tdXLF and XLF heterodimer constructs. (A) Ensemble time course end joining assay in XLF-depleted *Xenopus* egg extract. Recombinant tdXLF<sup>WT/WT</sup>, tdXLF<sup>L301E/WT</sup>, tdXLF<sup>WT/L301E</sup>, and tdXLF<sup>L301E/L301E</sup> were added back at 50 nM final concentration. (B) His10-XLF <sup>$\Delta$ tail $\Delta$ KBM</sup> and wt XLF were purified by NiNTA bead chromatography. (C) Schematic of NiNTA bead purification workflow. (D) SEC-MALS analysis of XLF heterodimers. *Figure 4—figure supplement 2 continued on next page*

## Figure 4—figure supplement 2 continued

concentration to their respective reaction samples. DNA species: scc, supercoiled closed circular; lin, linear; oc, open circle. **(B)** XLF heterodimer subunit exchange assay. His10-XLF<sup>ΔTailΔKBM</sup> and wt XLF each alone or in combination were incubated at room temperature (input: I) before being incubated with NiNTA resin that was subsequently, spun down (supernatant: Sup), washed, eluted with imidazole (eluate: Elu), and resuspended (beads: B). Exchange between dimer subunits in the His10-XLF<sup>ΔTailΔKBM</sup> + wt XLF sample would result in detecting wt XLF in the eluate and/or bead sample(s). The XLF antibody used here and throughout this study is specific to the XLF C-terminus (see Materials and methods), leading to no signal on the XLF blot for H10-XLF<sup>ΔTailΔKBM</sup>. **(C)** Cartoon schematic of experimental workflow of the heterodimer exchange assay. **(D)** Analysis of XLF constructs by size-exclusion chromatography and multi-angle light scattering (SEC-MALS). Each XLF construct (wt XLF (green), Flag-Avi-XLF/H10-XLF heterodimer (blue), and Flag-Avi-XLF/H10-XLF<sup>ΔTailΔKBM</sup> heterodimer (red)) eluted as a single peak (left y-axis). The corresponding molecular mass (right y-axis, shown in colors to match each sample peak) of the species present within each peak measured to within 10% of the expected mass of a dimer for each XLF sample. The XLF tandem dimer, tdXLF, has previously been shown to exist as a dimer via SEC-MALS (**Graham et al., 2018**).

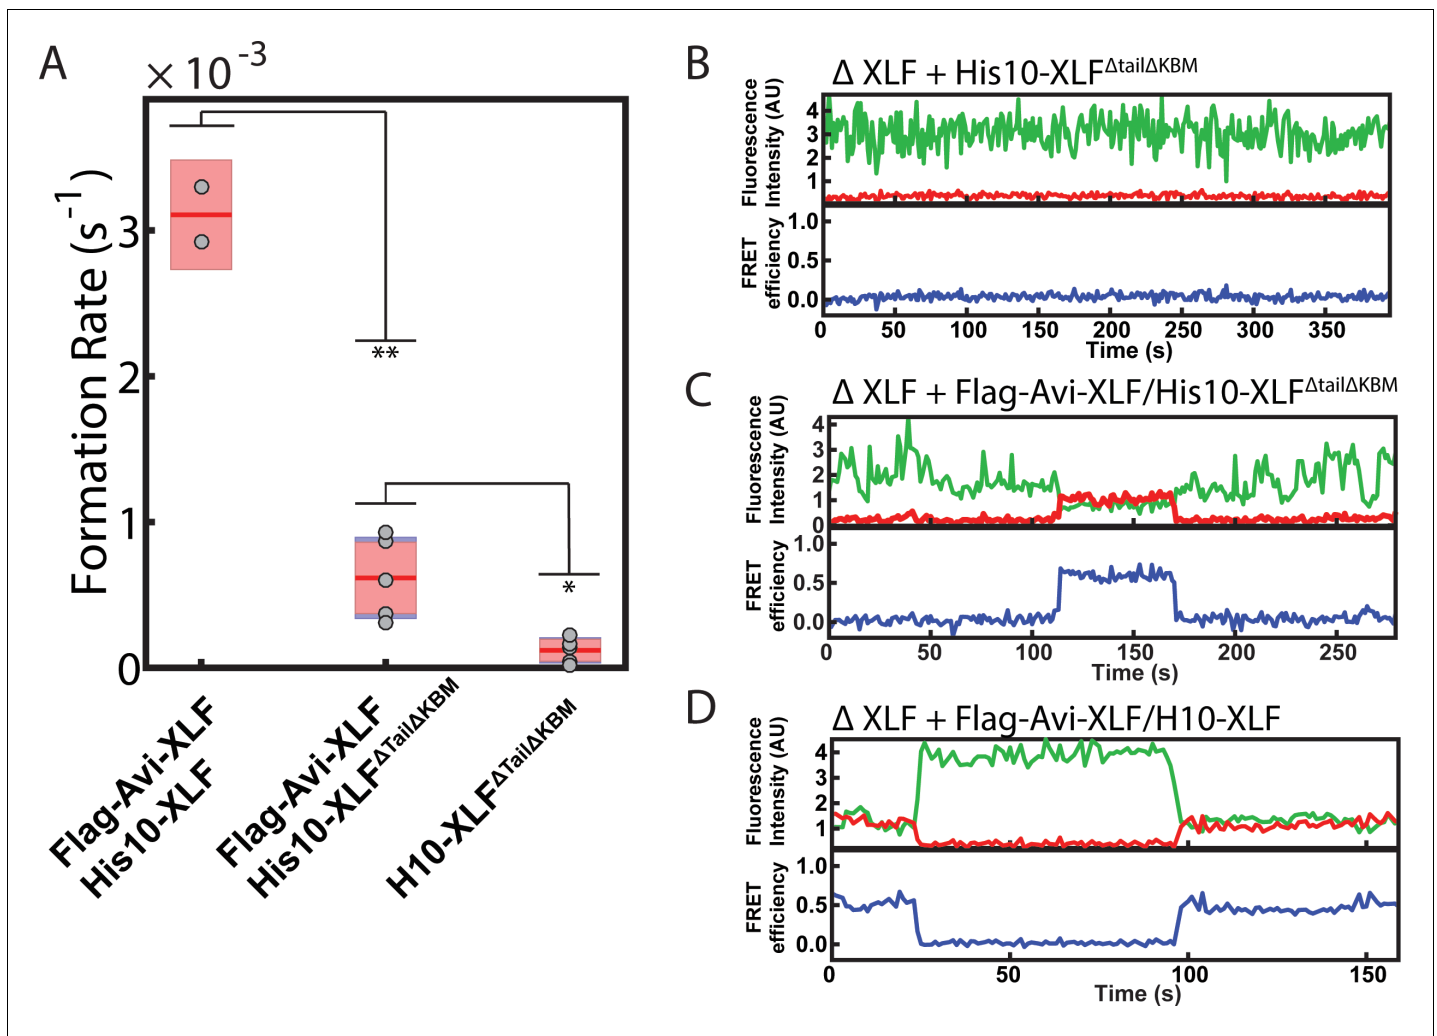

**Figure 4—figure supplement 3.** SR complex formation by XLF heterodimer constructs. (A) Plot of SR complex formation rates. For each condition, individual replicates are plotted as grey circles, and the mean is represented as dark red horizontal line. The 95% confidence interval is represented for each condition as a light red rectangle centered on the mean. This plot was generated using the notBoxPlot MATLAB function (Campbell, 2020). A two-tailed, unpaired t test with unequal variance was performed to determine that the rate of SR complex formation by Flag-Avi-XLF/His10-XLF $\Delta$ Tail $\Delta$ KBM is significantly slower than Flag-Avi-XLF/His10-XLF (\*\* $p=0.0092$ ) but significantly faster than dimers of His10-XLF $\Delta$ Tail $\Delta$ KBM (\* $p=0.0138$ ). (B, C, D) Example trajectories from the smFRET SR Complex formation assay for the  $\Delta$ XLF + H10-XLF $\Delta$ Tail $\Delta$ KBM,  $\Delta$ XLF + Flag-Avi-XLF/H10-XLF $\Delta$ Tail $\Delta$ KBM, and  $\Delta$ XLF + Flag-Avi-XLF/H10 XLF conditions, respectively, are shown. Donor and acceptor fluorescence intensity are shown in green and red, respectively. The corresponding FRET efficiency from each trace is shown in blue in a separate trajectory below.

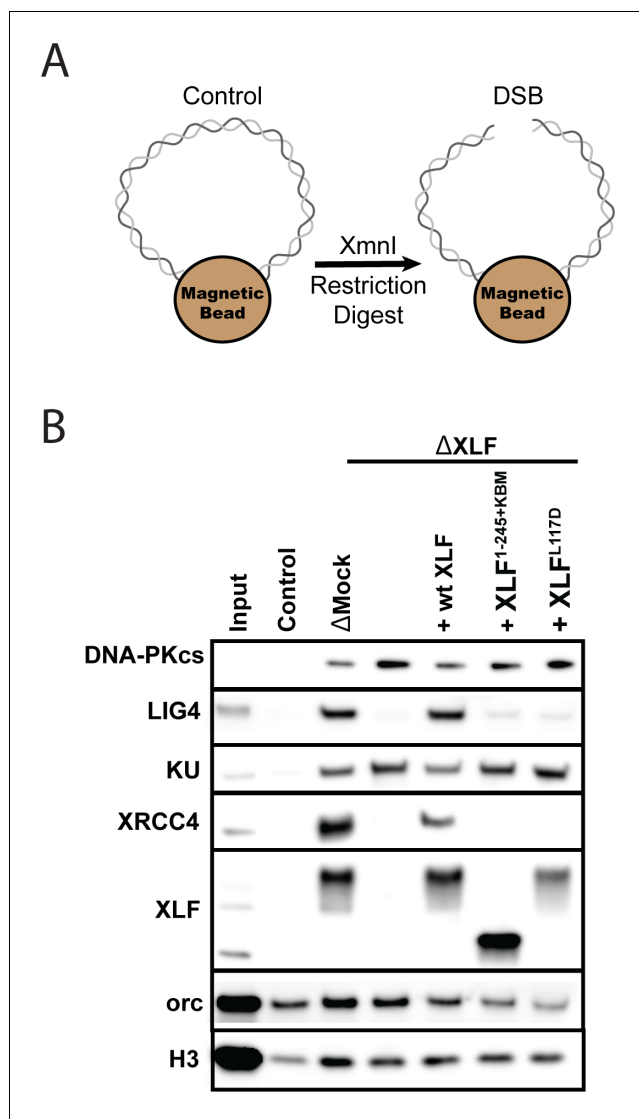

**Figure 5.** The XLF tail is required to stabilize XRCC4-Lig4. (A) Cartoon schematic of the DNA pulldown assay. Both ends of a linear DNA substrate are conjugated to magnetic beads, and either cut with XmnI to generate a DSB with blunt ends or left uncut as a control. (B) Immunoblots of NHEJ core factors (DNA-PKcs, Lig4, Ku, XRCC4, and XLF) and the loading controls, Orc and H3, bound to DNA-beads after a 15-min incubation in egg extract. Samples run in parallel were the input (extract diluted 1:40) and control (uncut DNA substrate pulldown) as well as pulldowns with the DSB substrate in either mock-depleted extract or XLF-depleted extract with recombinant wt XLF, XLF<sup>1-245+KBM</sup>, or XLF<sup>L117D</sup> added back at 20 nM. The lower band observed in the XLF input sample is an unidentified cross-reactive species (see **Figure 1—figure supplement 1B**) that is not pulled down under the control or the DSB condition.

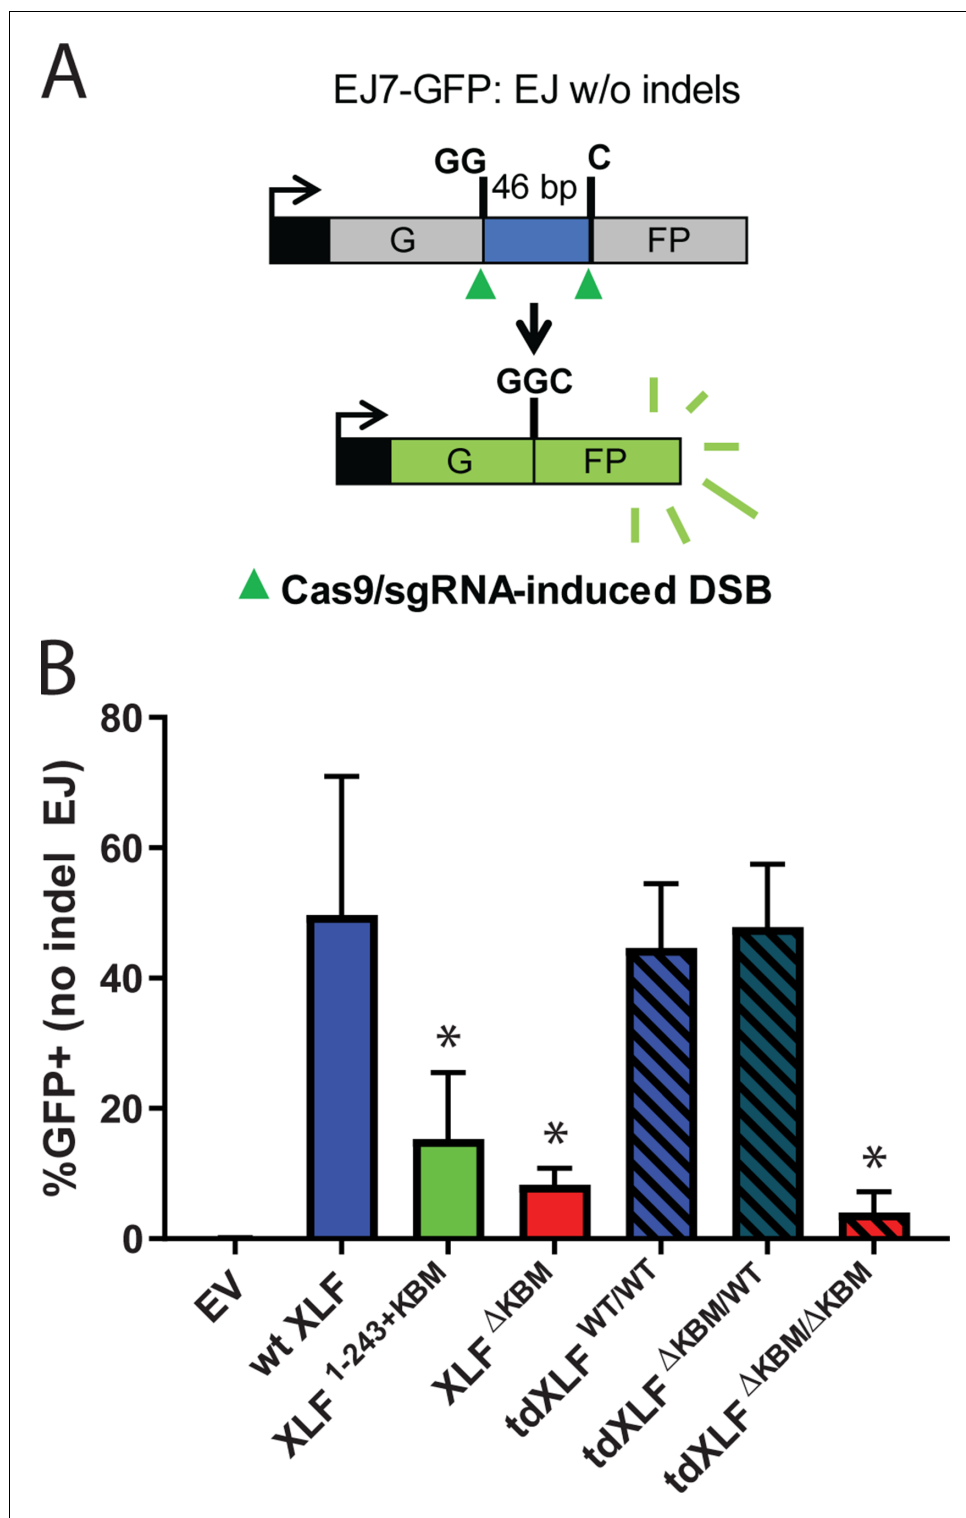

**Figure 6.** A single XLF tail is required for end joining in cells. (A) Schematic of the cellular GFP NHEJ reporter (EJ7-GFP). A 46 bp insertion is located within a region of the GFP gene that is critical for fluorescence. Cas9 and guide RNAs are expressed so that DSBs are induced on either end of this insertion. Fluorescence is restored only if the blunt ends of the GFP gene are repaired via error-free end joining. (B) Xlf<sup>-/-</sup> mESCs were transfected with an empty vector or the same vector containing a human XLF construct. The GFP frequencies were normalized against parallel transfections of a GFP<sup>+</sup> expression vector. The normalized mean %GFP<sup>+</sup> and corresponding standard deviation for each condition are shown. N=6 for each condition, and an unpaired T-Test with the Holm-Sidak

Figure 6 continued on next page



*Figure 6 continued*

correction was used to determine significance. An \* represents datasets that are significantly different ( $p \leq 0.015$ ) from the wt XLF results (XLF<sup>1-243+KBM</sup>  $p=0.015$ , XLF<sup>ΔKBM</sup>  $p=0.003$ , tdXLF<sup>WT/WT</sup>  $p=0.085$ , tdXLF<sup>ΔKBM/WT</sup>  $p=0.085$ , tdXLF<sup>ΔKBM/ΔKBM</sup>  $p=0.002$ ).

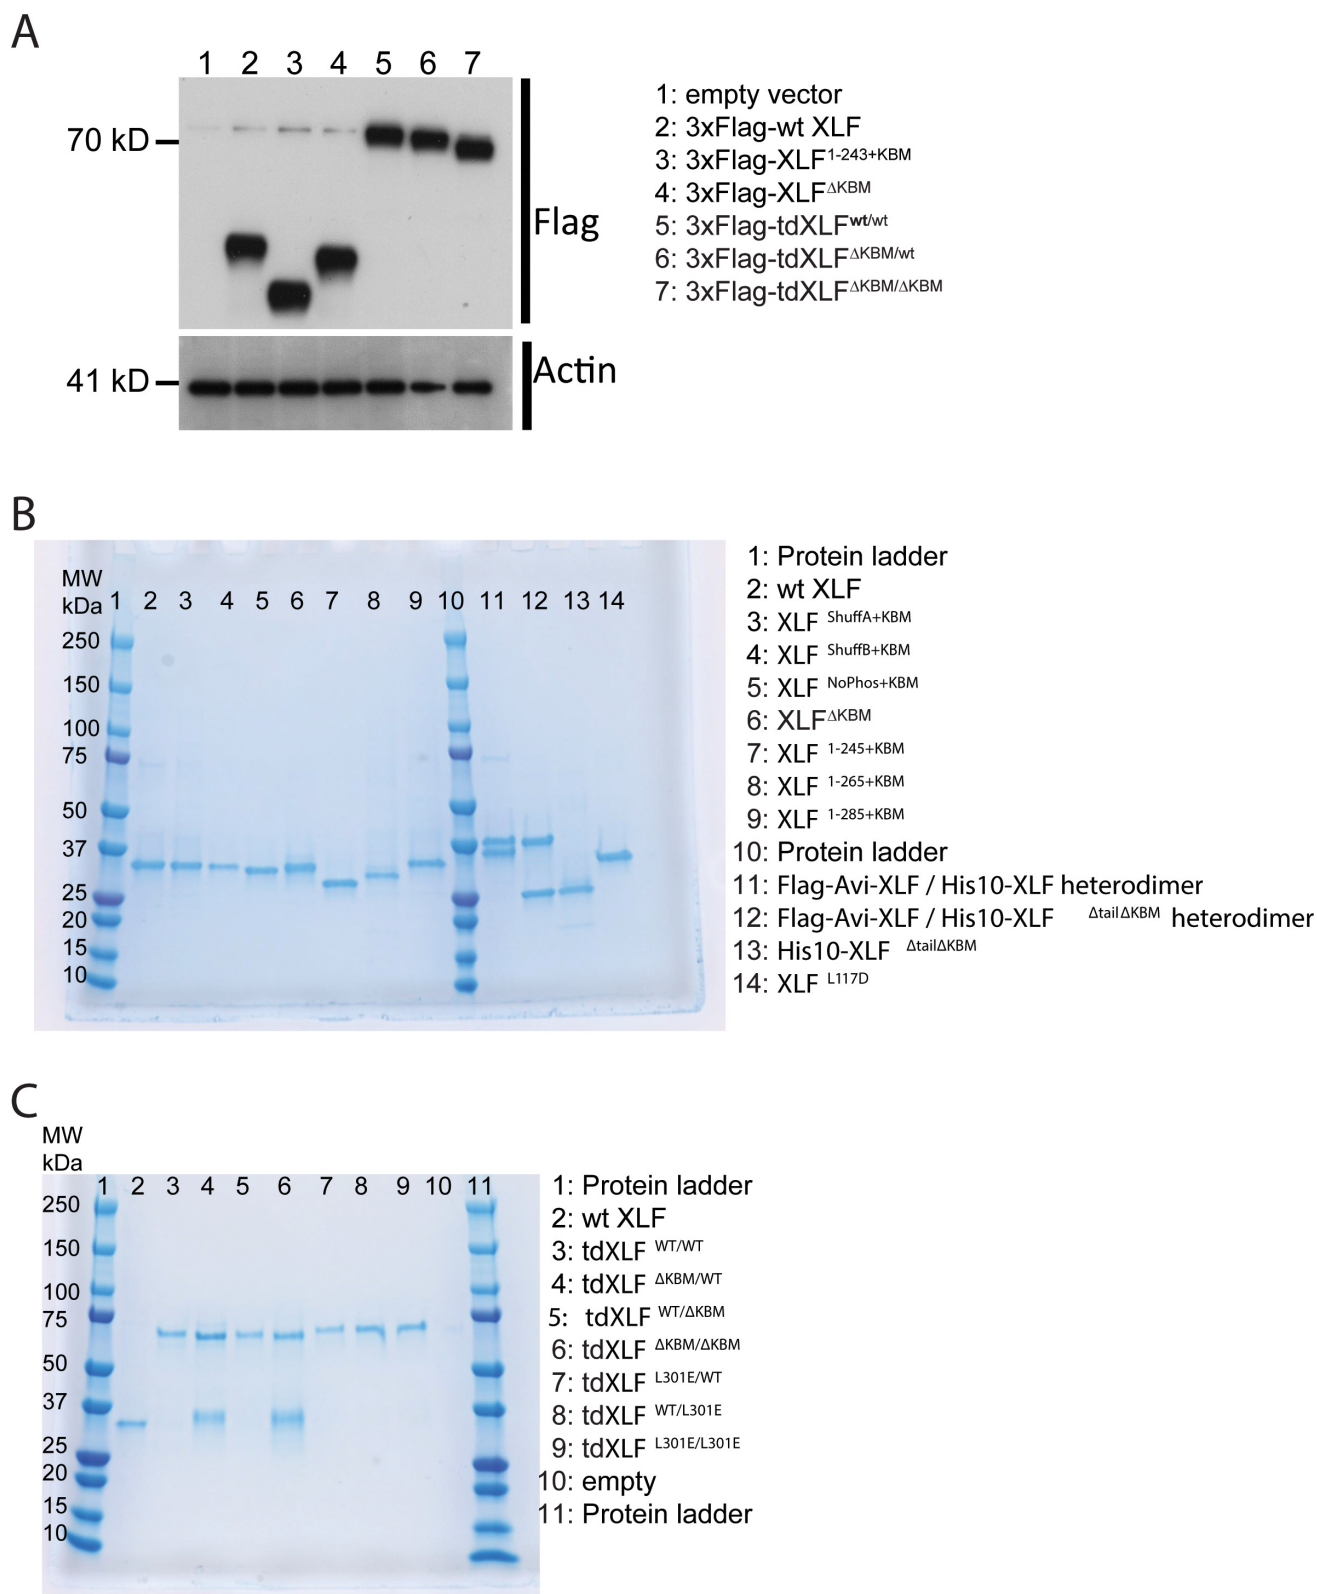

**Figure 6—figure supplement 1.** XLF constructs. (A) Expression of XLF constructs in mESCs after transfection with the indicated constructs within the pCAGGS-BSKX vector. Samples of extract from each transfection were blotted with both anti-Flag and anti-Actin antibodies. (B) XLF mutants and heterodimers. (C) XLF constructs and heterodimers. Figure 6—figure supplement 1 continued on next page

## Figure 6—figure supplement 1 continued

heterodimer constructs. For each construct, 1500 ng was loaded on a 4–15% Mini-PROTEAN TGX Precast Protein Gel (BioRad). For each heterodimer, 3 µg construct was loaded so that individual bands should be of the same intensity as the other XLF constructs. (C) Tandem dimer XLF constructs. 750 ng of wtXLF and each tandem dimer construct were loaded and run on a 4–15% Mini-PROTEAN TGX Precast Protein Gel (BioRad). tdXLF constructs where the KBM of subunit 1 was replaced with additional linker sequence (lane four tdXLF<sup>AKBM/WT</sup> and lane six tdXLF<sup>AKBM/ΔKBM</sup>) purified with a contaminants that run at ~ 35 kDa on these PAGE gels. These contaminant bands were sent for mass spectrometry (Taplin Mass Spectrometry Core Facility, Harvard Medical School). Although peptides corresponding to *Xenopus* XLF were detected in both cases, the majority of peptides identified were from endogenous *E. coli* proteins, with the bacterial lipid synthesis protein, lpxD, being responsible for 72% and 41% of peptides identified from the contaminant bands within the tdXLF<sup>AKBM/WT</sup> and tdXLF<sup>AKBM/ΔKBM</sup> samples, respectively.

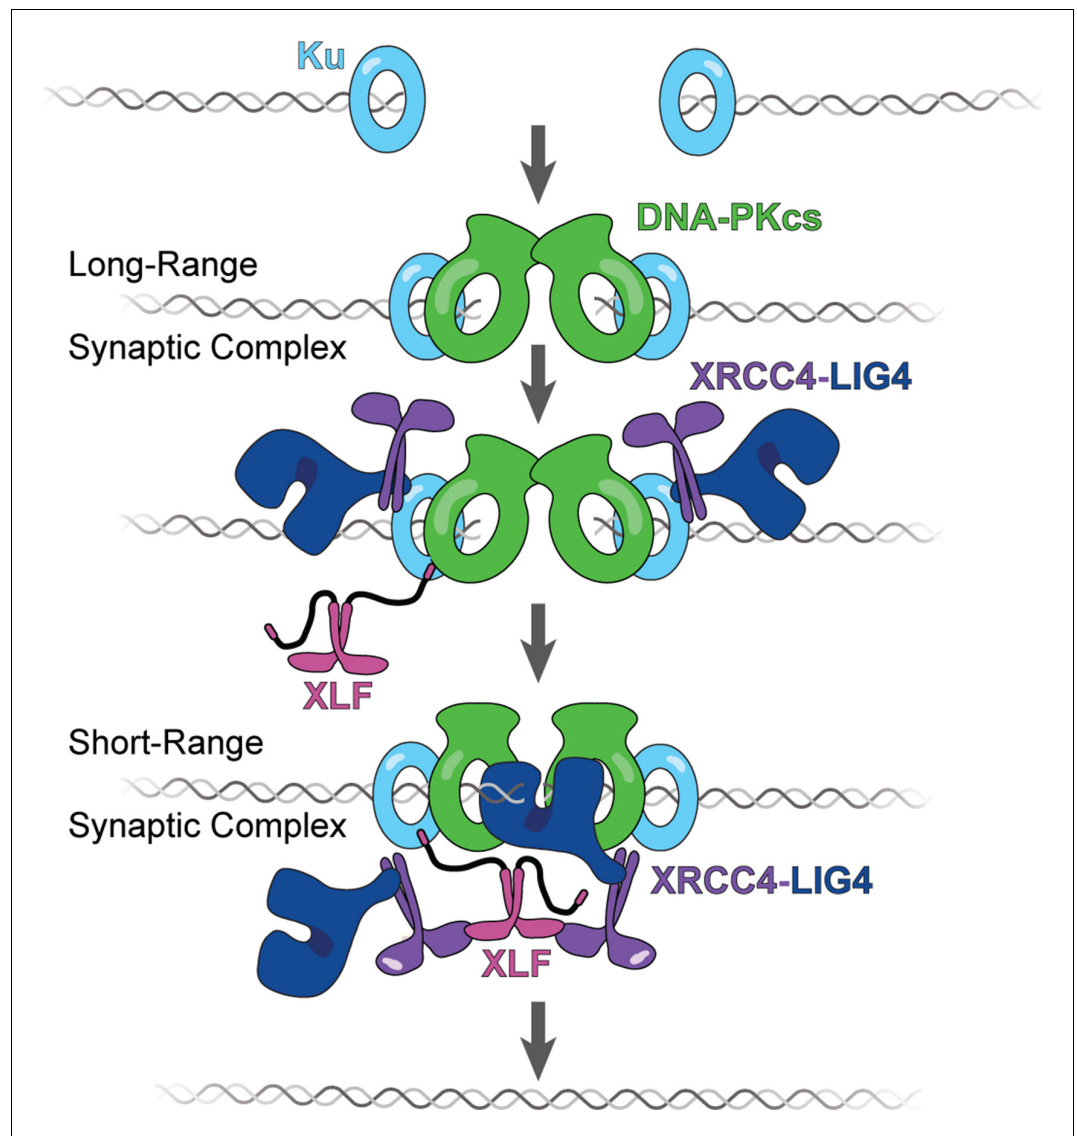

**Figure 7.** The tail enables XLF to stabilize XRCC4-Lig4 in the short-range (SR) complex. Cartoon model representing the evolution of the NHEJ synaptic complex. Ku initially binds DNA ends and DNA-PKcs is recruited shortly after to mediate formation of the long-range (LR) complex. The XLF KBM tethers it to Ku while the other domains of XLF can diffuse locally to find and bind XRCC4. This mediates the formation of the XRCC4-XLF-XRCC4 bridge that leads to SR complex formation and likely puts Lig4 in position to engage the DNA ends.
